# Supplementary material for: Asperuloside, the bioactive compound in the edible Eucommia ulmoides male flower, delays muscle aging by daf-16 mediated improvement in mitochondrial dysfunction
Source: Royal Society of Chemistry journal article supplement (doi:10.1039/d3fo01024d), 2023-01-01
Supplement: d3fo01024d1.xlsx [file d3fo01024d1.xlsx]

## Sheet: Iridoid composition
								Standard Curve
								1-aucubin
								2-asperuloside
								3-geniposide
	Sample	Mass(g）	Peak area	Content（mg/mL)	Content(%)
	1-aucubin
	EUFE-1	0.095	1.31644e+07	2.4586	25.88
	EUFE-2	0.095	1.46706e+07	0.62985	6.63
	EUFE-3	0.095	9.69252e+06	0.86545	9.11
	2-asperuloside
	EUFE-1	0.093	1.23269e+07	2.30268	24.76
	EUFE-2	0.093	1.39397e+07	0.59892	6.44
	EUFE-3	0.093	9.35894e+06	0.83607	8.99
	3-geniposide
	EUFE-1	0.098	1.38131e+07	2.57936	26.32
	EUFE-2	0.098	1.40985e+07	0.60564	6.18
	EUFE-3	0.098	1.04034e+07	0.92806	9.47
	1-aucubin	y=-41824.59868+5371440.21779x
	2-asperuloside	y=-213695.23976+23631500x
	3-geniposide	y=-133626.76385+11353800x

## Sheet: Motion status 
Normal aging
1 d		A			B			C			9 d	A			B			C
Control		59	60	59	1	0	1	0	0	0		25	27	29	24	22	22	11	11	9
Asp	50 μM	59	59	59	1	1	1	0	0	0		31	33	34	20	19	17	9	8	9
	100 μM	58	60	60	2	0	0	0	0	0		38	36	39	17	19	17	5	5	4
	200 μM	57	60	59	3	0	1	0	0	0		37	38	39	16	14	14	7	8	7
Gen	50 μM	60	60	60	0	0	0	0	0	0		27	28	28	21	23	22	12	9	10
	100 μM	58	58	59	2	2	1	0	0	0		29	29	28	22	24	24	9	7	8
	200 μM	56	58	60	4	2	0	0	0	0		35	36	36	19	17	18	6	7	6
Auc	50 μM	58	60	60	2	0	0	0	0	0		23	26	26	24	24	25	13	10	9
	100 μM	60	58	58	0	2	2	0	0	0		30	28	28	21	23	24	9	9	8
	200 μM	55	57	58	5	3	2	0	0	0		33	34	34	20	19	18	7	7	8
UA	50 μM	59	60	60	1	0	0	0	0	0		32	35	36	21	19	18	7	6	6
	100 μM	59	59	59	1	1	1	0	0	0		40	41	40	17	16	15	3	3	5
	200 μM	58	57	60	2	3	0	0	0	0		40	42	40	15	14	14	5	4	6
High-glucose
1 d		A			B			C			9 d	A			B			C
Control		59	60	60	1	0	0	0	0	0		9	9	10	25	24	23	26	27	27
Asp	50 μM	60	59	60	0	1	0	0	0	0		13	12	13	22	24	23	25	24	24
	100 μM	60	60	60	0	0	0	0	0	0		16	18	18	27	25	24	17	17	18
	200 μM	59	60	59	1	0	1	0	0	0		14	14	15	23	24	24	23	22	21
Gen	50 μM	60	60	60	0	0	0	0	0	0		11	12	11	25	22	23	24	26	26
	100 μM	60	58	59	0	2	1	0	0	0		13	13	15	24	24	21	23	23	24
	200 μM	59	58	60	1	2	0	0	0	0		16	16	18	28	25	23	16	19	19
Auc	50 μM	58	60	60	2	0	0	0	0	0		10	10	12	25	27	23	25	23	25
	100 μM	60	58	60	0	2	0	0	0	0		10	14	14	26	22	24	24	24	22
	200 μM	59	58	59	1	2	1	0	0	0		16	17	16	24	23	26	20	20	18
UA	50 μM	60	60	60	0	0	0	0	0	0		15	16	15	22	20	23	23	24	22
	100 μM	60	59	59	0	1	1	0	0	0		26	25	26	18	20	20	16	15	14
	200 μM	58	59	60	2	1	0	0	0	0		27	28	26	12	9	10	21	23	24
High-fat
1 d		A			B			C			9 d	A			B			C
Control		56	56	58	4	4	2	0	0	0		12	10	13	30	31	28	18	19	19
Asp	50 μM	58	59	58	2	1	2	0	0	0		21	22	22	24	22	24	15	16	14
	100 μM	59	60	60	1	0	0	0	0	0		30	29	30	21	22	22	9	9	8
	200 μM	58	59	59	2	1	1	0	0	0		25	24	24	21	23	23	14	13	13
Gen	50 μM	57	57	58	3	3	2	0	0	0		16	17	16	27	25	26	17	18	18
	100 μM	59	58	59	1	2	1	0	0	0		18	20	22	27	26	24	15	14	14
	200 μM	59	60	60	1	0	0	0	0	0		26	25	26	23	23	24	11	12	10
Auc	50 μM	58	58	57	2	2	3	0	0	0		17	18	18	25	23	24	18	19	18
	100 μM	58	58	60	2	2	0	0	0	0		18	20	18	25	22	25	17	18	17
	200 μM	59	57	59	1	3	1	0	0	0		22	23	23	24	23	24	14	14	13
UA	50 μM	56	57	58	4	3	2	0	0	0		17	15	17	27	30	27	16	15	16
	100 μM	58	59	57	2	1	3	0	0	0		23	25	25	25	22	22	12	13	13
	200 μM	56	56	59	4	4	1	0	0	0		20	21	20	25	24	22	15	15	18

## Sheet:  Body bends frequency
N2	Control-1	Asp-50-1	Asp-100-1	Asp-200-1	UA-100-1	EUFE-50	EUFE-100	EUFE-200		Control-9	Asp-50-9	Asp-100-9	Asp-200-9	UA-100-9	EUFE-50	EUFE-100	EUFE-200
	58	57.5	57	58.5	56	58.5	29	53		35	37.5	45	43	43.5	33	37	40.5
	54.5	46.5	55.5	58.5	56	58	36.5	54		31	36	44	42	42.5	32.5	33	41.5
	54	56.5	55	57	55	58	42.5	44		34.5	34	40	38	41.5	29.5	32.5	37.5
	54	55.5	55	57	54	57.5	40	48.5		33.5	31.5	40	38	40	29.5	32	42
	51.5	55	49	56.5	54.5	56.5	46.5	52		29.5	30.5	39.5	38	40	29.5	32	43
	53	53.5	49	56	54.5	55.5	36	36		25	28.5	39.5	37.5	37.5	29.5	30.5	40
	53	43	48.5	53.5	54.5	55.5	33	57.5		25	28.5	38.5	37.5	37	28.5	38	37
	52.5	53	48	41.5	54	54.5	36	47.5		25	28.5	38.5	37	36.5	28	39	36.5
	50	43	48	45.5	51	54.5	57	50.5		24.5	28	38	36.5	36.5	28	30	36
	50	33.5	48	42	50.5	54	57	54		24.5	26.5	37.5	36.5	36	27.5	29	35.5
	49	53	47	44.5	49.5	53.5	57	58		24	26.5	37	37.5	35.5	27.5	27.5	35
	48.5	44	46	46	49.5	53.5	56	37		23.5	26	37	38.5	35.5	27	27.5	35
	48.5	53	46	51.5	49	52	31	55		23.5	26	37	39.5	35.5	26.5	30	34.5
	48.5	52.5	45.5	38.5	48	51	53	57		23.5	25.5	36.5	36	34.5	26.5	30	34
	48	42.5	44.5	44.5	47	50	30	49		23	25	36.5	35.5	34	26	27	33
	48	42.5	44.5	41	46	49.5	37	37.5		23	24.5	36.5	35.5	34	25.5	26.5	33
	48	52.5	44.5	48.5	45.5	49.5	53	33.5		23	24.5	36	35.5	32	25	26.5	32
	47.5	52	44	46.5	45.5	49	36.5	42		22.5	24	35.5	34	32	25	26.5	31.5
	47.5	51.5	44	41	45.5	48.5	40.5	30		22	24	35	31.5	31.5	25	26	31.5
	47.5	51	43	48.5	44.5	48	38.5	43		21.5	24	34.5	31	31.5	24.5	26	31.5
	47	50.5	43	50.5	44.5	47	50	39.5		21	23.5	34	30	31.5	24.5	26	31
	46.5	50.5	53	50	44.5	47	45.5	53		20.5	17.5	33.5	29	31	24	25	30.5
	46.5	50	50	52.5	44.5	46.5	37.5	46.5		21	23.5	33.5	28.5	30	24	25	30
	46.5	50	43	42	44	45.5	42.5	47		24	22.5	33	27.5	29	23.5	25	30
	46	49.5	43	41.5	44	50	56.5	48.5		21	22.5	33	27.5	28.5	23	24.5	29.5
	45.5	49.5	42.5	38	44	45	41.5	56.5		19.5	22	33	27	28	23	24.5	29
	45.5	49.5	42.5	45	43.5	44.5	53	40		19	22	32.5	27	28	23	24	28
	45.5	48.5	42	44.5	43.5	43.5	44	56		18.5	21.5	32.5	26.5	27.5	22.5	24	42
	45.5	48.5	42	43	43	43	58	47.5		18.5	21.5	32	26	27.5	22.5	23.5	28
	45	46.5	42	45	43	42.5	54	35.5		18	21.5	32	26	27	21	23.5	28
	45	46.5	41.5	48	42	43.5	43	36.5		18	21	31.5	25	27	21	23	27.5
	45	47.5	42.5	46.5	42.5	42.5	46	41.5		18	21	31.5	24.5	27	20.5	23	27.5
	44.5	47.5	41.5	45.5	42.5	42	42	44.5		17	20.5	31	24	26.5	20.5	22	27
	44.5	46	44	45	42.5	40.5	49	57.5		17	20.5	31	24	26.5	20	22	27
	44.5	46	45	44.5	42.5	39.5	28.5	37		17	20.5	31	23.5	26.5	19	21	26.5
	44	47	41	53.5	42	39.5	52	37		16.5	20.5	31	23	26	18.5	21	26
	44	47	51	39	42	39	37	30.5		16.5	20	30	23	24.5	17.5	20.5	26
	43.5	46.5	41	53	41.5	38	46.5	57		16	17	29.5	23	24.5	17.5	20	25
	42.5	45.5	40.5	45.5	41.5	37.5	36.5	31.5		16	20	29.5	23	23.5	17	19.5	25
	41.5	45.5	40.5	46.5	41.5	37	40.5	39		15.5	20	29	22.5	23	16.5	19	25
	43.5	45.5	40.5	42	41	37	34.5	30		15.5	19.5	28.5	22	21.5	16.5	19	24.5
	43.5	45.5	40	47	41	36.5	43.5	50.5		15	17.5	28	20	18.5	15.5	19	24.5
	41.5	44.5	39.5	45	40.5	36	45	46		14.5	17.5	27.5	20	21.5	15.5	19	24.5
	41	44	53.5	41	40	36	49	41.5		14.5	19.5	27	19.5	17	15	18.5	24
	40	43.5	51.5	40	40	35.5	45.5	57		14.5	16.5	27	19	21	14.5	18	24
	40	42.5	39.5	38.5	38	35.5	50	33.5		14	19.5	26.5	18.5	20.5	14.5	18	23
	39.5	41	50.5	43.5	37.5	35	48	33		14	19	26	18	20	14	17.5	23
	39	40.5	39.5	52	36.5	34.5	52.5	47.5		13.5	19	23.5	18	20	14	17	22.5
	39	39.5	39.5	38	38.5	34.5	41	37.5		13	18.5	23.5	17.5	19.5	13.5	16.5	22.5
	39	39.5	39	43.5	38	50	35	28.5		12.5	18.5	23	17.5	19.5	13	15.5	22
	37.5	38.5	39	47	37.5	34	49	44.5		12	18.5	21.5	12	19	12	15.5	22
	37	38	39	39.5	37.5	32.5	28.5	57		12	18	21	13	18.5	12	15.5	20.5
	36	37.5	39	40.5	36	32	32	52		11.5	18	19.5	12	18	11.5	15	18.5
	36	36.5	38.5	36.5	35.5	32	51.5	35.5		10.5	17	18.5	12	17.5	10	15	20
	36	36	38.5	26.5	36.5	31.5	34	33		10	18	18	11.5	17.5	9	14.5	16
	31	31	38.5	31.5	35	31.5	45.5	49.5		7.5	14	17.5	11	13.5	8.5	14.5	16.5
	30	25	27.5	26	35	30.5	44	41.5		8.5	13.5	17	10	13	7	14	14
	27	24.5	34	35	31	28.5	50	37.5		6.5	12	16.5	9	13	7	13	14
	47.5	35.5	36	28	29	27	57.5	32		6	10.5	13	7.5	13	6.5	10	13
	28.5	24	26.5	25	25	32.5	42.5	49		5.5	8.5	12	6.5	12	6	9	11
N2	Control-9	EUFE-200-9	Asp-12-9	Auc-50-9	Gen-18-9	Combination-9
	35	40.5	36.5	35.5	35	40
	31	41.5	36	34.5	34	38.5
	34.5	37.5	35.5	33.5	34	38.5
	33.5	42	35.5	33	33.5	38
	29.5	43	34	32.5	33.5	37
	25	40	34	32	33.5	36
	25	37	33	32	33	36
	25	36.5	32.5	32	32.5	36
	24.5	36	32	31.5	32	35.5
	24.5	35.5	31.5	31.5	31.5	35.5
	24	35	30.5	31	31.5	35
	23.5	35	30	31	31	34.5
	23.5	34.5	29.5	30	30	34
	23.5	34	29	30	28.5	33.5
	23	33	28.5	29	28.5	33
	23	33	28.5	28.5	28	33
	23	32	28.5	27.5	27	33
	22.5	31.5	27.5	27	26.5	33
	22	31.5	27	27	26	32.5
	21.5	31.5	27	26.5	25	30
	21	31	26.5	26	25	30
	20.5	30.5	26.5	24.5	25	29
	21	30	25.5	24.5	22.5	29
	24	30	24.5	24.5	22.5	28.5
	21	29.5	24	24.5	22	28.5
	19.5	29	24	24.5	21	28
	19	28	23.5	24	19	27.5
	18.5	42	23	23.5	19	27
	18.5	28	22	23	19	27
	18	28	21.5	23	18.5	27
	18	27.5	21.5	22.5	18.5	25
	18	27.5	21	22	18	25
	17	27	20.5	21.5	18	24.5
	17	27	20.5	21	17.5	24
	17	26.5	19	20.5	17.5	24
	16.5	26	18	20	16.5	24
	16.5	26	18	19.5	16.5	23
	16	25	16.5	19	16	22.5
	16	25	16	18.5	15	22.5
	15.5	25	16	18.5	15	21.5
	15.5	24.5	16	17	14.5	21
	15	24.5	15	16.5	14	21
	14.5	24.5	14	16.5	14	20.5
	14.5	24	14	15.5	14	19
	14.5	24	13.5	15.5	13.5	18.5
	14	23	13.5	15	13	17.5
	14	23	13	15	12.5	17.5
	13.5	22.5	12.5	15	11.5	17.5
	13	22.5	12.5	13.5	11	17.5
	12.5	22	12.5	12.5	11	16.5
	12	22	12	12	10.5	16
	12	20.5	12	12	10	13.5
	11.5	18.5	11	12	10	13.5
	10.5	20	10	11	9.5	13
	10	16	10	9	9	12.5
	7.5	16.5	10	8.5	8	12
	8.5	14	9.5	8.5	8	11.5
	6.5	14	9	8	8	11.5
	6	13	9	8	8	11.5
	5.5	11	9	8	7.5	10.5
mev-1	Control-9	Asp-100-9	UA-100-9
	6.5	13	14
	8.5	19.5	13.5
	17	11.5	5
	20	16.5	11.5
	8	10	10.5
	19	20	15.5
	13	17.5	9.5
	7.5	11	14.5
	8.5	17.5	6
	19	13	13
	12	20	17.5
	11	12.5	12
	5	17.5	13
	14	11	14.5
	5	6.5	13
	19	19	9
	9.5	17.5	5
	7	13.5	6
	20	15.5	9
	19	15.5	14
	11	16	20
	12	5.5	11.5
	13.5	16	15.5
	9.5	11	18
	5	10.5	6
	9	11.5	11.5
	18.5	7	19
	19.5	16	6
	14.5	17.5	19
	7	17.5	15
	13.5	7.5	18.5
	5	16.5	8
	8	7	15.5
	17.5	7.5	8.5
	11.5	18.5	8.5
	19	18.5	20
	18	7.5	11.5
	16	19	10
	16.5	6.5	19
	14	15.5	20
	13	12.5	6.5
	12.5	5	5
	7	6.5	13.5
	17.5	14	18
	20	9.5	9
daf-16	Control-9	Asp-100-9	UA-100-9
	28	13	32
	25	19.5	32
	24.5	11.5	31
	22	16.5	31
	24.5	10	31
	30	20	30
	26	17.5	30
	24	11	30
	22	17.5	29.5
	21.5	13	29.5
	21.5	20	25.5
	25	12.5	25.5
	25.5	17.5	25
	22	11	25
	24.5	6.5	24.5
	28	19	24.5
	6.5	17.5	25
	16.5	21	25
	15	30	24
	5	26	24
	16.5	26	26.5
	20	28.5	22.5
	16	23	25
	19	27.5	28.5
	9.5	24.5	27.5
	18	28.5	26.5
	16.5	24	19
	5	27.5	24
	10	29	19.5
	14	23	22
	19.5	26.5	17
	15.5	26.5	23
	9	21.5	22.5
	16	12.5	22.5
	13.5	18.5	22
	15.5	18.5	22
	10	7.5	20
	10.5	19	19
	8	6.5	18
	14.5	15.5	18
	5	12.5	17
	16	5	16
	6	6.5	14
	7	14	13
	19	9.5	15.5
daf-16 RNAi	Control-9	Asp-100-9	UA-100-9	control RNAi	Control-9	Asp-100-9	UA-100-9
	27	29	32		35	46	43.5
	26.5	29	31.5		34.5	44	43
	26	28.5	31		34.5	43.5	41.5
	25	28.5	31		33.5	43	38
	27.5	28	30.5		32.5	41	38
	23.5	26	30.5		32.5	40.5	37
	23	25	28		25	39.5	36.5
	23	24.5	28		24.5	39.5	36.5
	22	24.5	27.5		24	39	35.5
	21.5	24.5	27.5		23	40	34
	21.5	24	29.5		23	40	33.5
	20.5	24	27.5		22	39	33
	20	23.5	27		22	38	33
	20	20.5	24		22	37	33
	20	20.5	27		21.5	37	32.5
	19.5	20	25		21	36.5	31.5
	19.5	19	26.5		20.5	36.5	30.5
	19	19	26.5		20.5	35.5	30.5
	19	19	26.5		20	37.5	30
	19	19	26		20	35.5	29.5
	18.5	18.5	24		20	35	29
	18	18.5	26		20	34	29
	17.5	18.5	24.5		20	33.5	29
	17.5	18	25.5		19.5	33.5	29
	17.5	18	25.5		19.5	33	28.5
	17	17.5	25		19.5	32	28
	16.5	17.5	24.5		19	32	27
	16	17.5	23.5		19	32	27
	16	17	23.5		18	32	26.5
	16	17	23.5		18	31	26.5
	15	17	23		18	31	26
	14.5	16.5	22.5		18.5	31	26
	14.5	16.5	22.5		18	30.5	26
	14	16.5	22.5		18	30	25.5
	13.5	16.5	22.5		17.5	29	25
	13	15.5	22		17.5	28.5	24.5
	13	15	21		17.5	28.5	24.5
	13	15.5	21		17	28	24
	12.5	15	21		17	27.5	23
	12	15.5	21		17	27	22.5
	12	15	22		15	26.5	22
	11.5	15	22		15	25.5	22
	11.5	14.5	21.5		14.5	25	22
	11.5	14.5	21.5		14	25	21
	11	14.5	21		14	24.5	21
	11	14	21		13.5	22.5	20.5
	11	14	21		13.5	22	20
	11	12.5	20.5		13	21	19.5
	10.5	12.5	20		11.5	21	19
	10.5	12	20		11.5	21	19
	9.5	12	19.5		11	20	18.5
	9.5	11.5	19.5		11	20	18.5
	9	11.5	19		11	19.5	18.5
	9	11	19		11	19	18.5
	8.5	11	18.5		9	17.5	18.5
	8	10.5	18.5		7	17	18
	7.5	10.5	18		7	15	18
	7.5	9.5	18		6	14.5	12.5
	7.5	9.5	18		6	13.5	12.5
	7	9.5	18		5.5	13	12
	6.5	9	17.5
	6	8.5	17
	5.5	8.5	17
	5.5	8	16.5
	5	8	15.5
		6.5	15.5
		9	15.5
		6	15
		5.5	14.5
		5	13.5
			12
			12.5
			11.5
			10
			10

## Sheet: Moving rates 
		1 d			5 d			9 d
	Control	3.21	3.13	3.16	2.18	2.08	2.19	0.62	0.61	0.55
100 μM	Asp	3.43	3.31	3.45	2.79	2.78	2.83	1.56	1.53	1.59
100 μM	UA	3.23	3.23	3.25	2.67	2.71	2.65	1.23	1.25	1.28
200 μg/mL	EUFE	3.33	3.22	3.4	2.75	2.77	2.71	1.35	1.36	1.29

## Sheet: Muscle fibre morphology
1 d	A			B			C
Control	8	6	7	2	4	3	0	0	0
9d
Control	2	1	3	4	6	4	4	3	3
100 μM Asp	4	4	4	5	5	4	1	1	2
100 μM UA	3	2	3	5	6	6	2	2	1
200 μg/mL EUFE	3	4	3	6	4	5	1	2	2

## Sheet: oil red o
	Control-1	Control-9	Asp-100-9	UA-100-9	EUFE-200-9
Relative intensity	0.90604	7.65101	4.32886	6.7953	5.33557
	1.30872	7.55034	4.73154	8.00336	7.14765
	0.704698	7.44966	4.32886	8.2047	5.33557
	1.51007	8.85906	7.14765	8.30537	5.9396
	0.503356	8.75839	6.14094	8.10403	7.55034
	0.90604	7.65101	7.14765	7.39933	6.24161
	0.503356	7.04698	5.73826	7.09732	6.6443
	1.10738	6.54362	7.34899	7.60067	6.84564
	1.51007	8.15436	7.04698	8.10403	5.2349
	1.20805	8.75839	6.94631	7.19799	6.44295
	1.00671	7.95302	6.34228	6.59396	6.04027
	0.604027	6.6443	7.14765	6.49329	5.83893
	1.00671	8.75839	6.34228	5.88926	7.04698
	1.51007	8.65772	7.04698	7.70134	5.63758
	0.704698	6.94631	6.94631	7.80201	6.14094
	0.704698	8.65772	4.42953	7.09732	7.55034
	1.20805	7.95302	7.55034	7.60067	6.44295
	0.90604	8.3557	7.55034	5.88926	5.03356
	0.805369	6.6443	4.63087	6.7953	6.44295
	1.20805	8.25503	6.14094	7.80201	5.03356
	1.4094	9.0604	5.73826	6.29195	6.84564
	0.805369	7.95302	6.34228	6.7953	6.94631
	0.503356	8.65772	7.34899	6.7953	6.04027
	1.10738	7.65101	4.5302	7.29866	6.14094
	1.10738	6.54362	5.2349	6.29195	5.03356
	1.20805	8.85906	7.55034	6.69463	6.94631
	0.90604	6.6443	7.34899	8.30537	6.6443
	1.00671	6.6443	6.44295	8.10403	5.13423
	0.90604	8.15436	7.34899	6.89597	6.24161
	1.20805	8.75839	6.94631	7.80201	5.73826

## Sheet: OCR
Measurement # (loop)	N2								Asp-100								UA-100
1	124.658	111.179	110.164	138.192	127.38	144.671	146.098	98.3558	157.981	210.293	231.207	196.025	173.128	174.877	175.987	185.503	205.207	220.397	195.789	201.126	89.3197	110.22	86.4825	93.813
2	121.029	118.918	92.2436	92.3852	137.942	128.991	140.346	95.1264	220.207	202.875	237.758	168.455	167.052	172.637	191.659	173.705	195.558	209.196	187.177	194.308	86.6107	108.112	84.8214	91.8158
3	136.573	101.945	92.105	107.793	98.3944	92.2922	107.29	130.661	239.1	166.189	173.301	200.55	201.432	198.218	211.269	182.858	196.746	209.536	187.885	195.502	86.9866	106.308	84.0648	90.364
4	144.825	121.422	121.813	148.682	149.534	151.016	155.75	148.247	250.833	239.161	250.465	221.89	224.657	214.352	238.236	207.335	218.34	223.893	201.126	212.051	229.871	253.15	229.548	232.524
5	275.11	250.567	255.666	263.308	249.891	262.944	271.039	249.555	381.469	388.248	417.493	382.908	361.769	361.959	394.405	403.995	349.883	355.84	332.763	342.748	337.661	361.681	336.731	339.099
6	269.017	268.129	246.222	245.023	250.831	263.227	244.962	259.677	376.418	369.413	398.138	408.097	389.092	411.166	412.109	370.034	356.95	362.291	339.685	350.1	338.868	362.512	338.216	341.914
7	248.114	264.245	243.799	243.006	268.361	253.242	253.487	224.689	361.921	390.596	345.339	380.587	340.017	330.69	389.353	388.101	379.052	381.755	354.208	365.758	369.554	393.706	372.133	378.64
8	252.328	268.976	259.557	241.583	248.095	261.429	266.888	243.927	417.655	375.27	390.814	370.159	362.686	361.622	409.36	412.427	381.598	386.924	358.91	370.581	365.868	390.657	368.404	373.089
9	241.183	242.487	255.745	240.901	261.975	261.628	276.93	273.898	402.687	360.358	411.677	368.931	397.893	399.319	399.312	395.569	382.204	387.299	360.183	374.441	362.695	388.044	364.485	368.934
10	54.7	53.9724	56.8595	54.6286	50.2012	60.8078	51.0802	55.4562	57.8122	57.4377	60.2192	56.6924	55.3294	56.4793	57.2347	58.5807	44.902	47.1216	20.574	36.7473	65.4754	93.2907	65.5691	67.0865
11	52.083	53.2065	51.2745	57.868	53.716	52.3556	58.7599	54.2305	56.7734	60.3741	58.8073	58.9805	56.248	60.1327	58.8055	55.2879	51.8095	52.436	27.1744	44.7823	67.017	98.6841	66.5715	68.862
12	52.2649	51.6322	54.2028	54.1359	50.4475	57.8278	53.223	29.6758	55.6766	56.6466	57.1383	58.0916	57.9756	59.7547	59.0296	60.5862	58.5542	58.9579	33.8266	52.9403	68.2726	101.23	68.2912	70.3058
		N2			100 μM Asp			100 μM UA
Basal respiration		5.89932	1.3363	8	9.58184	1.61384	8	7.10257	2.86425	8
Maximalrespiration		12.8905	2.38291	8	19.1151	2.39691	8	17.5971	1.50385	8
Spare capacity		6.99113	1.18593	8	9.53329	0.958553	8	10.4945	2.86096	8
Non-mitochondrialrespiration		2.67846	0.511611	8	2.87407	0.317504	8	2.9031	1.03759	8
Measurement # (loop)	daf-16-RNAi								daf-16-RNAi-Asp
1	87.9663	99.3882	98.2996	86.5791	95.7162	94.8386	83.934	99.4947	120.4	114.929	120.627	109.172	80.1098	105.732	104.863	111.647
2	99.8113	84.9773	97.0499	95.7521	94.232	101.961	96.2999	99.4469	94.2881	112.87	91.238	105.322	96.5694	99.8854	113.297	120.015
3	80.8721	95.3202	96.2133	98.4257	97.9449	98.2418	93.0253	93.3782	80.1841	88.6862	82.9209	119.843	102.719	96.4949	104.375	98.4651
4	113.361	114.769	108.59	108.265	117.009	121.705	116.436	120.844	150.174	144.302	140.939	125.682	132.704	135.146	123.773	128.33
5	201.387	198.962	208.1	197.268	191.439	192.494	245.923	203.461	231.733	240.554	239.065	248.344	205.374	195.868	247.316	214.659
6	198.62	249.073	202.489	196.404	231.059	246.256	247.611	232.698	232.648	234.12	250.814	224.047	210.876	242.629	236.3	225.937
7	221.177	231.028	225.041	213.507	223.916	234.916	202.564	209.226	219.1	211.42	203.574	200.014	191.393	245.927	230.738	233.532
8	246.387	203.72	212.78	209.573	199.269	209.405	233.271	246.947	247.106	250.004	232.99	193.331	215.828	226.257	246.491	211.442
9	227.965	243.609	225.386	220.441	211.295	225.925	192.144	204.757	204.54	215.115	190.498	194.769	215.704	194.21	201.916	240.611
10	30.06	32.4724	37.3765	49.1618	43.2371	49.426	42.0239	30.6786	41.1597	44.5672	37.2138	34.7746	46.3251	38.6188	46.8991	49.1752
11	46.7588	37.9631	39.0257	30.0054	30.6947	40.6939	50.8525	44.9205	36.4929	42.3638	39.3086	50.8114	47.7718	37.1951	32.275	39.3594
12	46.2736	39.7429	47.8	37.3613	47.417	40.3883	44.5418	49.7933	45.2126	38.8366	32.2197	31.8741	37.1198	47.7994	38.4092	33.8557
		daf-16RNAi			daf-16RNAi+100μMAsp
Basal respiration		4.70588	0.433472	8	4.77201	0.652501	8
Maximalrespiration		10.8715	1.2919	8	10.2968	1.36737	8
Spare capacity		6.16561	0.910344	8	5.52483	0.835918	8
Non-mitochondrialrespiration		2.05295	0.267213	8	1.86671	0.230637	8

## Sheet: ATP
ATP content（nM/100 worms）
Control-1 d	408.473	366.008	398.722
Control-9 d	217.379	210.442	191.194
100 μM Asp	274.2	244.448	234.926
100 μM UA	304.982	274.17	254.477

## Sheet: ROS
Time (h)	Control-day 1			Control-day 9			100 μM Asp			100 μM UA
0	3.02333	5.93433	3.18933	6.85133	5.10233	10.4963	7.57933	2.73733	7.91733	2.32733	1.91233	2.26133
1	6.53833	12.2593	8.33633	55.9403	54.8003	56.7723	19.1853	16.7743	22.0083	22.2233	31.9393	30.2373
2	33.5267	45.0507	40.7657	198.802	231.029	213.602	59.9497	74.3117	72.3487	62.6747	71.5117	67.5007
3	86.3247	107.869	107.274	467.376	539.351	478.565	151.197	166.667	199.46	236.796	266.753	296.471
4	197.775	260.376	273.885	944.508	1104.15	1012.18	343.323	459.434	464.877	484.177	584.467	566.064

## Sheet: Widely targeted metabolom
Index	Compounds	物质	Class I	物质一级分类	Class II	物质二级分类	Q1 (Da)	Molecular weight (Da)	Ionization model	Formula	Level	NF-1	NF-2	NF-3	F-C-1	F-C-2	F-C-3	F-Asp-1	F-Asp-2	F-Asp-3	QC01	QC02	QC03	cpd_ID	HMDB	PubChem CID	CAS	ChEBI	Metlin
MEDN2276	(24S)-24,25-dihydroxyvitamin D3	（24S）-24,25-二羟基维生素D3	CoEnzyme and vitamins	辅酶和维生素	CoEnzyme and vitamins	辅酶和维生素	415.3	416.329	[M-H]-	C27H44O3	2	112544	147832	141292	159978	166691	130160	135691	149900	154042	143522	139795	141808	-	-	5283749	55700-58-8	-	-
MEDN1921	(2R)-1-O-beta-D-Galactopyranosylglycerol	（2R）-1-O-β-D-吡喃半乳糖基甘油	Carbohydrates and Its metabolites	碳水化合物及其代谢物	Carbohydrates and Its metabolites	碳水化合物及其代谢物	253.1	254.1	[M-H]-	C9H18O8	2	15000.2	9813.66	15322.2	13838.8	10046.9	11354.4	13067.1	10056.9	15318.2	7422.25	11602.7	9662.73	C05401	HMDB0038664	16048618	16232-91-0	-	-
MEDN2099	(2s)-2-Amino-4-sulfinobutanoic acid	（2s）-2-氨基-4-亚磺基丁酸	Amino acid and Its metabolites	氨基酸及其代谢物	Amino acid derivatives	氨基酸衍生物	166	167.025	[M-H]-	C4H9NO4S	2	38359.1	27426.5	33574.6	50113.1	57339.1	38883.7	56409.8	49037.7	40175.8	42437.2	36416.8	47819.1	-	-	75896	2686-70-6	-	-
MEDP2334	(R)-(-)-1-Amino-2-propanol	(R)-(-)-1-氨基-2-丙醇	Alcohol and amines	醇、胺类	Amines	胺类	76.1	75.0684	[M+H]+	C3H9NO	1	403389	384050	328511	396190	427392	421511	418560	460421	337771	349554	328966	386286	C03194	-	439938	2799-16-8	-	-
MEDP1126*113	(R)-(-)-2-phenylglycine	(R)-(-)-2-苯基甘氨醇	Amino acid and Its metabolites	氨基酸及其代谢物	Amino acid derivatives	氨基酸衍生物	120.1	137.084	[M-H2O+H]+	C8H11NO	1	2.81946e+07	2.37374e+07	2.8673e+07	2.84487e+07	2.8076e+07	2.69444e+07	2.53453e+07	2.69749e+07	2.86998e+07	2.66995e+07	2.4883e+07	2.35534e+07	-	-	2724025	56613-80-0	-	-
MEDP0823	(R)-2-Hydroxy-3-phenylpropionic acid	(R)-(+)-3-苯乳酸	Organic acid And Its derivatives	有机酸及其衍生物	Organic acid And Its derivatives	有机酸及其衍生物	167	166.063	[M+H]+	C9H10O3	2	1.52665e+07	1.36696e+07	15967270	1.63485e+07	1.65737e+07	1.45296e+07	1.37518e+07	1.73156e+07	1.46068e+07	1.46526e+07	1.39686e+07	1.5034e+07	C05607	HMDB0000563	643327	7326-19-4	43065	5547
MEDP2197	(Z)-13-Eicoseneamide	(Z)-13-二十二烯酰胺	FA	脂肪酰类	Others	其他	338.3	337.334	[M+H]+	C22H43NO	2	1.50145e+07	1.10331e+07	1.38015e+07	1.04804e+07	1.06724e+07	1.12702e+07	2.10941e+07	3.84735e+07	1.03981e+07	1.02946e+07	8.01932e+06	9.03673e+06	-	-	5365371	112-84-5	-	-
MEDN0750*054	(±)12-HEPE	(±)-12-羟基-5Z,8Z,10E,14Z,17Z-二十碳五烯酸	FA	脂肪酰类	Oxidized lipids	氧化脂质	317.2	318.219	[M-H]-	C20H30O3	2	158776	170866	163249	203177	201343	188061	183094	186416	201186	182509	172886	187741	-	HMDB0010202	10041593	81187-21-5	72645	-
MEDN0752*054	(±)15-HEPE	(±)-15-羟基-5Z,8Z,11Z,13E,17Z-二十碳五烯酸	FA	脂肪酰类	Oxidized lipids	氧化脂质	317.2	318.219	[M-H]-	C20H30O3	2	158776	170866	163249	203177	201343	188061	183094	186416	201186	182509	172886	187741	-	HMDB0010209	53480357	88852-33-9	-	-
MEDN1437	(±)17(18)-DiHETE	17,18-双羟基-5Z,8Z,11Z,14Z-二十碳四烯酸	FA	脂肪酰类	Oxidized lipids	氧化脂质	335.2	336.23	[M-H]-	C20H32O4	2	11414	13619.2	13743.9	18459.3	20432.1	19442.1	13720.2	10345.9	11693	13211.4	9950.42	16693	-	HMDB0010211	16061120	-	88349	-
MEDN0755*056	(±)17-HETE	(±)17-羟基-5Z,8Z,11Z,14Z-二十碳四烯酸	FA	脂肪酰类	Oxidized lipids	氧化脂质	319.2	320.235	[M-H]-	C20H32O3	2	7.94948e+06	8.8973e+06	12640618	1.747e+07	1.09103e+07	1.46579e+07	1.32386e+07	1.69903e+07	1.64388e+07	1.55069e+07	1.2023e+07	1.27607e+07	-	HMDB0012598	6442740	128914-47-6	63995	-
MEDN0756*054	(±)18-HEPE	(±)-18-羟基-5Z,8Z,11Z,14Z,16E-二十碳五烯酸	FA	脂肪酰类	Oxidized lipids	氧化脂质	317.2	318.219	[M-H]-	C20H30O3	1	158776	170866	163249	203177	201343	188061	183094	186416	201186	182509	172886	187741	-	HMDB0012611	53481496	141110-17-0	-	-
MEDN0757*056	(±)18-HETE	(±)18-羟基-5Z,8Z,11Z,14Z-二十碳四烯酸	FA	脂肪酰类	Oxidized lipids	氧化脂质	319.2	320.235	[M-H]-	C20H32O3	2	7.94948e+06	8.8973e+06	12640618	1.747e+07	1.09103e+07	1.46579e+07	1.32386e+07	1.69903e+07	1.64388e+07	1.55069e+07	1.2023e+07	1.27607e+07	-	HMDB0006245	11141754	133268-58-3	91132	-
MEDN0759	(±)5-HEPE	(±)-5-羟基-6E,8Z,11Z,14Z,17Z-二十碳五烯酸	FA	脂肪酰类	Oxidized lipids	氧化脂质	317.2	318.219	[M-H]-	C20H30O3	2	11603	11076.6	10810.3	15015.1	11240.7	10709.2	6557.71	9145.29	12922.5	11430.3	12050.1	12753.7	-	HMDB0005081	6439678	83952-40-3	72801	-
MEDN1191	1,2-epoxy-3-(p-nitrophenoxy) propane	1,2-环氧-3-(对硝基苯氧基)丙烷	Benzene and substituted derivatives	苯及其衍生物	Benzene and substituted derivatives	苯及其衍生物	194	195.053	[M-H]-	C9H9NO4	2	22043.7	17706.8	22282.5	28414.4	24475	23185.4	23424.7	20812.5	23646.9	23062.3	20349.5	22745.7	C04274	-	21327	5255-75-4	-	-
MEDP1212	1,3-Dicyclohexylurea	1,3-二环己基脲	Alcohol and amines	醇、胺类	Polyamines	多胺	225.2	224.189	[M+H]+	C13H24N2O	2	184256	195101	199529	190499	192694	182617	176195	148396	187601	185026	193153	201907	-	-	4277	2387-23-7	-	-
MEDP1464	1,3-Diphenylguanidine	1,3-二苯基胍	Alcohol and amines	醇、胺类	Polyamines	多胺	212.1	211.111	[M+H]+	C13H13N3	2	20071.4	31085.8	22697.2	13326.9	26790.9	35932.3	24350.7	29758.1	26973.6	18620.7	17369.1	30626.8	D88181	-	7594	102-06-7	-	-
MEDN2278	1,4-Cyclohexanedicarboxylic acid	1,4-环己烷二甲酸	Organic acid And Its derivatives	有机酸及其衍生物	Organic acid And Its derivatives	有机酸及其衍生物	171.1	172.074	[M-H]-	C8H12O4	2	394441	409743	357628	360364	364706	376234	381672	404203	426159	267100	286551	293218	-	-	14106	1076-97-7	-	-
MEDP0115	1,4-Dihydro-1-Methyl-4-Oxo-3-Pyridinecarboxamide	1,4-二氢-1-甲基-4-氧代-3-吡啶甲酰胺	Heterocyclic compounds	杂环化合物	Pteridines and derivatives	蝶啶及其衍生物	153.1	152.059	[M+H]+	C7H8N2O2	1	388745	529064	394469	661269	683550	627587	327118	544551	548774	483306	479588	408953	C05843	HMDB0004194	440810	769-49-3	27838	-
MEDN0136	1,7-Dimethylxanthine	1,7-二甲基黄嘌呤	Nucleotide And Its metabolites	核苷酸及其代谢物	Nucleotide And Its metabolites	核苷酸及其代谢物	179.1	180.065	[M-H]-	C7H8N4O2	1	19032	21695.3	16416.7	14730.4	19194.4	12950.3	16704.6	13705.5	15708.3	16880.5	18091.8	15695.3	C13747	HMDB0001860	4687	611-59-6	25858	1457
MEDP2132*108	1-Aminocyclobutanecarboxylic acid	1-氨基-1-环丁烷羧酸	Amino acid and Its metabolites	氨基酸及其代谢物	Amino acid derivatives	氨基酸衍生物	116.1	115.063	[M+H]+	C5H9NO2	1	86912.6	100614	219562	218555	193474	241981	256377	227237	95651	238959	216688	222007	-	-	89643	22264-50-2	-	-
MEDP2005	1-Aminocyclohexanecarboxylic acid	1-氨基环己甲酸	Organic acid And Its derivatives	有机酸及其衍生物	Organic acid And Its derivatives	有机酸及其衍生物	144.1	143.095	[M+H]+	C7H13NO2	2	391168	308733	242602	276608	343013	330579	339611	332831	258691	307757	288265	304805	-	-	1366	2756-85-6	-	-
MEDP0831*101	1-Aminopropan-2-ol	DL-1-氨基-2-丙醇	Alcohol and amines	醇、胺类	Alcohols	醇类	76	75.0684	[M+H]+	C3H9NO	2	35715.6	47095.5	54432.7	50350.4	63100.2	55542.9	64844.1	44942.4	39433.1	62809.1	41386	54038.7	C05771	HMDB0012136	4	78-96-6	19030	-
MEDP1247	1-Deoxyvaleric acid	1-脱氧淀粉酸	Organic acid And Its derivatives	有机酸及其衍生物	Organic acid And Its derivatives	有机酸及其衍生物	235.2	234.162	[M+H]+	C15H22O2	1	476044	369004	587982	634894	305178	435033	684415	616966	580833	451763	404900	520605	C20404	-	71448993	-	-	-
MEDP2725	1-Fluorocyclohexadiene-cis,cis-1,2-diol	1-氟环己二烯-cis,cis-1,2-二醇	Alcohol and amines	醇、胺类	Alcohols	醇类	131	130.043	[M+H]+	C6H7FO2	2	4.36551e+06	4.12701e+06	3.22837e+06	3.43614e+06	4.14981e+06	3.0223e+06	3.68678e+06	3.90754e+06	4.06664e+06	3.7136e+06	3.52237e+06	3.17552e+06	-	-	23724766	-	-	-
MEDP1003*113	1-Hydroxylamino-2-phenylethane	羟苯乙胺	Benzene and substituted derivatives	苯及其衍生物	Benzene and substituted derivatives	苯及其衍生物	120.1	137	[M-H2O+H]+	C8H11NO	1	2.81946e+07	2.37374e+07	2.8673e+07	2.84487e+07	2.8076e+07	2.69444e+07	2.53453e+07	2.69749e+07	2.86998e+07	2.66995e+07	2.4883e+07	2.35534e+07	-	-	165091	3217-93-4	-	-
MEDP1654*155	1-Methyladenosine	1-甲基腺苷	Nucleotide And Its metabolites	核苷酸及其代谢物	Nucleotide And Its metabolites	核苷酸及其代谢物	282.1	281.112	[M+H]+	C11H15N5O4	1	26961.9	46776	63512.1	96786.3	51410.4	72716.8	61646	62498.7	48462.2	49013.1	56595.3	48687.6	C02494	-	27476	15763-06-1	-	-
MEDP1162*124	1-Methylguanine	1-甲基鸟嘌呤	Nucleotide And Its metabolites	核苷酸及其代谢物	Nucleotide And Its metabolites	核苷酸及其代谢物	166.1	165.065	[M+H]+	C6H7N5O	1	357418	403036	393963	332984	392541	421088	198576	215867	160826	289281	260025	232503	C04152	HMDB0003282	3778	938-85-2	21803	3778
MEDP2421*159	1-Methylguanosine	1-甲基鸟苷	Nucleotide And Its metabolites	核苷酸及其代谢物	Nucleotide And Its metabolites	核苷酸及其代谢物	298.1	297.107	[M+H]+	C11H15N5O5	1	68025.6	89804	81632.6	134460	73425.6	40383.7	72843.2	87528	76428.5	106922	80458.3	96655.8	C04545	HMDB0001563	96373	2140-65-0	19062	6324
MEDP1974*117	1-Methylpiperidine-2-carboxylic acid	1-甲基哌啶-2-羧酸	Amino acid and Its metabolites	氨基酸及其代谢物	Amino acid derivatives	氨基酸衍生物	144.1	143.095	[M+H]+	C7H13NO2	2	229418	251510	196689	263214	254099	194209	247827	228697	240419	266399	200241	207986	-	-	415939	7730-87-2	-	-
MEDN0698*017	1-Naphthol	1-萘酚	Benzene and substituted derivatives	苯及其衍生物	Phenolics	苯酚类	143	144.058	[M-H]-	C10H8O	2	90345.8	88818.3	92331.1	63121.9	85368.6	95158.5	93463.7	57340.3	106200	84372.1	89544.4	91235.6	C11714	HMDB0012138	7005	90-15-3	10319	-
MEDN1231	1-O-vanillyl-β-D-glucose	1-O-香草基-β-D-葡萄糖	Benzene and substituted derivatives	苯及其衍生物	Benzene and substituted derivatives	苯及其衍生物	329.1	330.095	[M-H]-	C14H18O9	2	30737.6	42737	41906.7	55767.1	71221.1	48014.2	41089.3	64193.2	57159.7	60974.6	51584.1	47120.1	C20470	-	14132344	-	-	-
MEDP1127	1-acetylindole	1-乙酰吲哚	Heterocyclic compounds	杂环化合物	Indole and Its derivatives	吲哚及其衍生物	160.1	159.068	[M+H]+	C10H9NO	2	36292.9	36228	41760.5	46740.6	36103	43013.7	32796.8	30306.5	35335.3	32182.5	41991.8	49598.4	-	-	68470	576-15-8	-	-
MEDN2310	1-arachidonoyl-2-hydroxy-sn-glycero-3-phosphate	1-花生四烯醇-2-羟基-sn-甘油-3-磷酸	GP	甘油磷脂类	LPA	溶血磷脂酸	457.2	458.243	[M-H]-	C23H39O7P	2	81943.9	88168.5	99514.3	105906	102798	99609.2	97306	98539.6	100467	80165.7	92883.6	43033	-	-	87648539	-	-	-
MEDP2754	1-desoxymethylsphinganine	1-脱氧甲基二氢鞘氨醇	SL	鞘脂类	SM	鞘磷脂	272.3	271.288	[M+H]+	C17H37NO	2	638474	725489	639433	699997	719147	576555	612053	653047	641103	814251	787238	815771	-	-	70678793	1219484-98-6	-	-
MEDP1273	10-deoxyformamycin	10-脱氧甲霉素	Others	其他	Others	其他	454.3	453.309	[M+H]+	C25H43NO6	1	3.98562e+06	4.41079e+06	4.13436e+06	6.84997e+06	6.86388e+06	6.77412e+06	2.39337e+06	4.73464e+06	4.7018e+06	4.38063e+06	4.26537e+06	4.38681e+06	C11994	-	14155	11091-33-1	-	-
MEDN1081	12,13-DiHOME	12,13-二羟基-9Z-十八烯酸	FA	脂肪酰类	Oxidized lipids	氧化脂质	313.2	314.246	[M-H]-	C18H34O4	1	9108.44	9837.31	10341.1	26975.5	20951.8	19445.5	9409.74	8953.29	13867.9	10144	12578.3	13378.3	-	-	10236635	263399-35-5	-	-
MEDN0767*052	12,13-EpOME	(±)12(13)环氧-9Z-十八碳烯酸	FA	脂肪酰类	Oxidized lipids	氧化脂质	295.2	296.235	[M-H]-	C18H32O3	1	33396.6	35801.8	33143.5	34058.2	32220.3	36017.5	37983.9	34244.4	30955.7	35236.2	37092.4	38977.7	C14826	HMDB0004702	5356421	-	38299	-
MEDN2300	15-Methyl prostaglandin F2alpha	15-甲基前列腺素F2α	FA	脂肪酰类	Oxidized lipids	氧化脂质	367.2	368.256	[M-H]-	C21H36O5	2	110919	87296.8	96098.3	69915.6	70491.3	38717.9	88211.3	59421.8	107767	88365.3	91168	78582.7	-	-	5281075	35700-23-3	-	-
MEDN1112*052	16-Hydroxyhexadecanoic acid	16-羟基十六酸	FA	脂肪酰类	FFA	游离脂肪酸	271.2	272.235	[M-H]-	C16H32O3	1	33396.6	35801.8	33143.5	34058.2	32220.3	36017.5	37983.9	34244.4	30955.7	35236.2	37092.4	38977.7	C18218	HMDB0006294	10466	506-13-8	55328	-
MEDP0550	18-Hydroxycorticosterone	18-羟基皮质(甾)酮	Hormones and hormone related compounds	激素及激素相关物质	Hormones and hormone related compounds	激素及激素相关物质	363.2	362.209	[M+H]+	C21H30O5	1	2.23653e+06	2.49959e+06	2.57025e+06	2.36847e+06	2.72626e+06	2.64667e+06	2.86158e+06	2.9529e+06	2.92921e+06	1.92569e+06	2.63766e+06	2.87721e+06	C01124	HMDB0000319	11222	561-65-9	16485	5308
MEDN0774*057	19(S)-HETE	19S-羟基-5Z,8Z,11Z,14Z-二十碳四烯酸	FA	脂肪酰类	Oxidized lipids	氧化脂质	319.2	320.235	[M-H]-	C20H32O3	2	151776	140618	502502	605728	286608	555071	702036	806118	171788	473281	386265	358808	C14749	HMDB0011136	9548883	115461-40-0	34185	-
MEDN1677*066	2'-Aenylic Acid	腺苷-2'-磷酸	Nucleotide And Its metabolites	核苷酸及其代谢物	Nucleotide And Its metabolites	核苷酸及其代谢物	346.1	347.063	[M-H]-	C10H14N5O7P	2	308761	267233	300231	389940	299981	294210	312600	317178	320597	278898	312846	277704	C00946	-	94136	130-49-4	-	-
MEDP2418	2'-Deoxyadenosine	2-脱氧腺苷	Nucleotide And Its metabolites	核苷酸及其代谢物	Nucleotide And Its metabolites	核苷酸及其代谢物	252.1	251.102	[M+H]+	C10H13N5O3	1	29752.3	36084.9	39816.9	63903.4	31195.6	33963	85588.2	81375.6	25526.5	42471.8	55550.3	62945.9	C00559	HMDB0000101	13730	958-09-8	17256	3382
MEDP0149	2'-Deoxyadenosine-5'-Monophosphate	5'-单磷酸-2'-脱氧腺苷	Nucleotide And Its metabolites	核苷酸及其代谢物	Nucleotide And Its metabolites	核苷酸及其代谢物	332	331.068	[M+H]+	C10H14N5O6P	1	79045.4	53610.7	60366.2	116499	158883	93157.6	103211	126024	114266	108655	115163	88042.8	C00360	HMDB0000905	12599	653-63-4	17713	3461
MEDP0888	2'-Deoxycytidine-5'-Diphosphate	2'-脱氧胞苷5'-二磷酸	Nucleotide And Its metabolites	核苷酸及其代谢物	Nucleotide And Its metabolites	核苷酸及其代谢物	388.2	387.023	[M+H]+	C9H15N3O10P2	2	11988.1	13403	20091.6	32152.7	23336.2	16194.1	24394.6	40739	18020.8	14089.8	16529.3	19001.2	C00705	HMDB0001245	150855	800-73-7	28846	6105
MEDN0747*042	2,4-Di-tert-butylphenol	2,4-二叔丁基苯酚	Benzene and substituted derivatives	苯及其衍生物	Phenolics	苯酚类	205.2	206.167	[M-H]-	C14H22O	2	102640	118452	110339	87819.5	108293	123544	115482	85881.6	93588.4	240549	207785	229693	-	HMDB0013816	14339290	96-76-4	89188	-
MEDP0883	2,4-Dihydroxypteridine	2,4-二羟基蝶啶	Heterocyclic compounds	杂环化合物	Pteridines and derivatives	蝶啶及其衍生物	165.3	164.033	[M+H]+	C6H4N4O2	2	15241.8	5597.91	1163.17	8288.09	8955.82	16235.2	5127.43	1147.03	6645.4	16570.8	10087.4	14225.3	C03212	-	10250	487-21-8	-	-
MEDP2092	2,4-Quinolinediol	2,4-喹啉二醇	Heterocyclic compounds	杂环化合物	Heterocyclic compounds	杂环化合物	162.1	161.048	[M+H]+	C9H7NO2	1	723678	680919	696022	669659	749636	668793	734239	723037	725224	677410	676743	677388	C16716	-	54680871	86-95-3	-	-
MEDP1814	2,5-Dimethyl-2,3-dihydrofuran-3-one	1,2,5-二甲基-3,2-二氢呋喃	Heterocyclic compounds	杂环化合物	Heterocyclic compounds	杂环化合物	113.1	112.052	[M+H]+	C6H8O2	2	789537	636317	647306	786295	707124	552331	666132	765788	660634	814879	759892	767723	D90227	HMDB0032233	85730	14400-67-0	-	-
MEDP0694	2,5-Dimethyl-pyrazine	2,5-二甲基吡嗪	Heterocyclic compounds	杂环化合物	Heterocyclic compounds	杂环化合物	109.3	108.069	[M+H]+	C6H8N2	2	60130.3	27114.5	46647.5	58566.3	45163.5	37090.9	42281	46159.9	45571.1	43664.5	39710.2	21122.2	-	HMDB0035289	31252	123-32-0	-	-
MEDN0689	2,5-Furandicarboxylicacid	2,5-呋喃二羧酸	Organic acid And Its derivatives	有机酸及其衍生物	Organic acid And Its derivatives	有机酸及其衍生物	155	156.006	[M-H]-	C6H4O5	2	689993	663953	804744	623469	726542	744082	691396	716566	505565	729316	754958	702710	C20450	HMDB0004812	76720	3238-40-2	84212	7076
MEDN1837	2,6-Di-tert-butyl-4-(hydroxymethyl)phenol	2,6-二叔丁基-4-(羟甲基)苯酚	Benzene and substituted derivatives	苯及其衍生物	Benzene and substituted derivatives	苯及其衍生物	235.2	236.178	[M-H]-	C15H24O2	2	147492	137280	127903	136349	133184	129123	149133	142719	141716	132954	147665	157819	-	HMDB0032048	6929	88-26-6	-	-
MEDN0278	2,6-Diaminopimelic acid	2,6-二氨基庚二酸	Organic acid And Its derivatives	有机酸及其衍生物	Organic acid And Its derivatives	有机酸及其衍生物	189.1	190.095	[M-H]-	C7H14N2O4	2	23388.3	27251.2	22443.6	26038.2	16236.1	13687.4	19291.8	25995.6	24592.3	29200.3	24725.6	25894.6	C00666	HMDB0001370	865	583-93-7	16026	352
MEDN1496	2,6-Dimethoxybenzoic acid	2,6-二甲氧基苯甲酸	Organic acid And Its derivatives	有机酸及其衍生物	Organic acid And Its derivatives	有机酸及其衍生物	181.1	182.058	[M-H]-	C9H10O4	2	20642.3	31448	23684.1	35925.4	33860.3	27928.8	19602.5	24487.6	29105.9	20665.7	27047.8	25940.8	-	HMDB0029273	15109	1466-76-8	545935	-
MEDP0606	2-(3,4-dimethoxyphenyl)ethanamine	2-(3,4-二甲氧基苯基)乙胺	Benzene and substituted derivatives	苯及其衍生物	Benzene and substituted derivatives	苯及其衍生物	182.1	181.11	[M+H]+	C10H15NO2	2	82431.8	30310.4	80562.1	82875.1	111154	114203	18602.9	82042.4	98933.8	77065.3	94144.2	95049.9	-	HMDB0041806	8421	120-20-7	136995	-
MEDN0554	2-(4-Hydroxyphenyl)ethanol	对羟基苯乙醇	Benzene and substituted derivatives	苯及其衍生物	Benzene and substituted derivatives	苯及其衍生物	137.1	138.068	[M-H]-	C8H10O2	2	386938	456127	584239	420340	455392	473012	440496	417524	507866	448570	487339	495340	C06044	HMDB0004284	7044	501-94-0	1879	7044
MEDN2111	2-(Acetylamino)-2-deoxy-A-D-glucopyranose	2-（乙酰氨基）-2-脱氧-A-D-吡喃葡萄糖	Alcohol and amines	醇、胺类	Amines	胺类	220.1	221.09	[M-H]-	C8H15NO6	2	73419.6	75604.9	57806.3	53988.1	89475.2	84417.6	71184.7	71999.9	83332.2	62423.6	74977.2	65403.1	C13970	-	82313	10036-64-3	-	-
MEDN0415	2-(Formylamino)Benzoic Acid	2-(甲酰氨基)苯甲酸	Benzene and substituted derivatives	苯及其衍生物	Phenolic acids	酚酸类	164	165.043	[M-H]-	C8H7NO3	1	145027	139546	155518	153143	150566	153607	149253	174992	147760	132192	156232	153155	C05653	HMDB0004089	101399	3342-77-6	36575	-
MEDN1241	2-(α-D-mannosyl)-3-phosphate glyceride	2-(α-D-甘露糖基)-3-磷酸甘油酸酯	Alcohol and amines	醇、胺类	Amines	胺类	347	348.046	[M-H]-	C9H17O12P	2	125354	93093.3	232449	246167	151986	170591	184256	104169	75458.8	139990	162045	179310	C11516	-	13686	-	-	-
MEDP2027*126	2-Amino-2-deoxymannose	D-甘露糖胺	Alcohol and amines	醇、胺类	Amines	胺类	180.1	179.079	[M+H]+	C6H13NO5	2	17266	22507.8	22799.4	27484.6	29984.3	28806.1	28446	11122.7	20020.2	12022.8	13121	8536.55	-	-	123961	2636-92-2	-	-
MEDP2525	2-Amino-2-methyl-1,3-propanediol	2-氨基-2-甲基-1,3-丙二醇	Alcohol and amines	醇、胺类	Alcohols	醇类	106.1	105.078	[M+H]+	C4H11NO2	2	49800.4	64676.1	42374.3	56926.3	44450.5	66027	35859.1	67879.6	30001	38253.8	42906.6	52003.6	-	-	1531	115-69-5	-	-
MEDN2155	2-Amino-5-nitrobenzoic acid	2-氨基-5-硝基苯甲酸	Benzene and substituted derivatives	苯及其衍生物	Benzene and substituted derivatives	苯及其衍生物	181	182.033	[M-H]-	C7H6N2O4	2	137432	104400	155220	117780	123759	115904	144851	138090	144163	142162	114430	133567	C19788	-	12032	616-79-5	-	-
MEDP2590	2-Aminoadenosine	2-氨基腺苷	Nucleotide And Its metabolites	核苷酸及其代谢物	Nucleotide And Its metabolites	核苷酸及其代谢物	283.1	282.107	[M+H]+	C10H14N6O4	2	34428.3	27728.8	33742.3	41850.4	35210.4	32820.2	44338.3	47245.2	29182.4	39402.5	38337.6	28814.4	C00939	-	72200	2096/10/8	-	-
MEDP1956	2-Aminopurine	2-氨基嘌呤	Nucleotide And Its metabolites	核苷酸及其代谢物	Nucleotide And Its metabolites	核苷酸及其代谢物	136.1	135.054	[M+H]+	C5H5N5	2	1.15022e+06	1.17842e+06	2.34626e+06	2.77903e+06	1.10581e+06	2.10419e+06	2.66171e+06	3.0205e+06	1.53597e+06	1.72899e+06	1.8638e+06	1.77747e+06	-	-	9955	452-06-2	-	-
MEDN0502	2-Deoxyribose 1-Phosphate	2-脱氧核糖 1-磷酸	Carbohydrates and Its metabolites	碳水化合物及其代谢物	Phosphate sugars	磷酸糖	213	214.024	[M-H]-	C5H11O7P	2	1.15584e+06	1.18463e+06	1.62269e+06	1.09829e+06	1.09277e+06	968412	957246	1.1053e+06	954621	915618	858260	974586	C00672	HMDB0001351	439287	17210-42-3	28542	6182
MEDP2738	2-Hexadecanoylthio-1-ethylphosphorylcholine	2-十六烷基硫代-1-乙基磷酰胆碱	FA	脂肪酰类	Others	其他	482.3	481.299	[M+H]+	C23H48NO5PS	2	4.00256e+06	3.64532e+06	3.98825e+06	3.23074e+06	3.38164e+06	3.03945e+06	2.64509e+06	2.7395e+06	2.83683e+06	2.76439e+06	2.74735e+06	2.66487e+06	-	-	194114	60793-01-3	-	-
MEDP2008	2-Hydroxy-4-(methylthio)butyric acid	2-羟基-4-(甲硫基)丁酸	Organic acid And Its derivatives	有机酸及其衍生物	Organic acid And Its derivatives	有机酸及其衍生物	151	150.035	[M+H]+	C5H10O3S	2	262204	259875	233227	219324	228227	247561	296207	278072	231198	213091	218131	192281	-	HMDB0037115	11427	583-91-5	-	-
MEDP0151*121	2-Hydroxy-6-Aminopurine	2-羟基-6-氨基嘌呤	Nucleotide And Its metabolites	核苷酸及其代谢物	Nucleotide And Its metabolites	核苷酸及其代谢物	152.1	151.049	[M+H]+	C5H5N5O	1	319724	329561	807701	862734	390927	759758	394369	718596	288689	322601	381129	366262	-	HMDB0000403	76900	3373-53-3	62462	5392
MEDN1311	2-Hydroxycaprylic acid	2-羟基辛酸	Organic acid And Its derivatives	有机酸及其衍生物	Organic acid And Its derivatives	有机酸及其衍生物	159	160.11	[M-H]-	C8H16O3	2	99539	123875	127138	94980.2	97077.3	114489	72192.5	108727	121619	114305	103802	103645	D81442	HMDB0000711	94180	617-73-2	86543	5679
MEDP0507	2-Hydroxycinnamic acid	2-羟基肉桂酸	Benzene and substituted derivatives	苯及其衍生物	Phenolic acids	酚酸类	165	164.047	[M+H]+	C9H8O3	2	210273	239481	392952	274090	149738	268421	312522	321569	255078	273855	292548	278767	C01772	HMDB0002641	637540	614-60-8	18125	6727
MEDN1052*017	2-Hydroxyglutaric acid	(S)-2-羟基戊二酸	Organic acid And Its derivatives	有机酸及其衍生物	Organic acid And Its derivatives	有机酸及其衍生物	147	148.037	[M-H]-	C5H8O5	2	90345.8	88818.3	92331.1	63121.9	85368.6	95158.5	93463.7	57340.3	106200	84372.1	89544.4	91235.6	C03196	-	439939	13095-48-2	-	-
MEDN1708	2-Hydroxyhippuric acid	2-羟基马尿酸	Benzene and substituted derivatives	苯及其衍生物	Phenolics	苯酚类	194	195.053	[M-H]-	C9H9NO4	2	79731	86885.2	82494.5	85486.5	102443	92084.6	72525.6	81875.3	93647.8	77448.9	78529.2	91433.1	C07588	HMDB0000840	10253	487-54-7	9008	617
MEDP1251	2-Mercaptobenzothiazole	2-巯基苯并噻唑	Heterocyclic compounds	杂环化合物	Heterocyclic compounds	杂环化合物	168	166.986	[M+H]+	C7H5NS2	1	27778.8	23222.5	21998.4	22007	18249.2	20398.4	24914.8	18116.5	25358	18245.8	18886.1	20819.5	C14437	-	17395437	149-30-4	-	-
MEDP0110	2-Methoxybenzoic Acid	邻甲氧基苯甲酸	Benzene and substituted derivatives	苯及其衍生物	Phenolic acids	酚酸类	153	152.047	[M+H]+	C8H8O3	2	458663	368271	321838	442888	354847	225759	447686	478903	497221	404579	419451	425362	-	HMDB0032604	11370	529-75-9	421840	-
MEDP1982	2-Methyl-1-Pyrroline	2-甲基-1-吡咯啉	Heterocyclic compounds	杂环化合物	Heterocyclic compounds	杂环化合物	84.1	83.0735	[M+H]+	C5H9N	1	170181	231339	176242	194924	242414	57662.2	156215	181681	208669	130022	188735	205653	C20808	-	70103	872-32-2	-	-
MEDN1057	2-Methyl-d-erythritol 2,4-cyclodiphosphate	2-甲基-d-赤藓糖醇2,4-环二磷酸	Carbohydrates and Its metabolites	碳水化合物及其代谢物	Phosphate sugars	磷酸糖	277	277.996	[M-H]-	C5H12O9P2	2	1.96663e+06	1.77169e+06	1.75849e+06	1.59675e+06	1.56628e+06	1.46647e+06	1.67526e+06	1.52009e+06	1.79585e+06	1.69588e+06	1.50819e+06	1.81713e+06	-	-	126747	143488-44-2	-	-
MEDP0461*159	2-Methylguanosine	2-甲基鸟苷	Nucleotide And Its metabolites	核苷酸及其代谢物	Nucleotide And Its metabolites	核苷酸及其代谢物	298.1	297.107	[M+H]+	C11H15N5O5	1	68025.6	89804	81632.6	134460	73425.6	40383.7	72843.2	87528	76428.5	106922	80458.3	96655.8	-	HMDB0005862	135501934	2140-77-4	19702	-
MEDN0683*017	2-Naphthol	2-萘酚	Benzene and substituted derivatives	苯及其衍生物	Phenolics	苯酚类	143	144.058	[M-H]-	C10H8O	2	90345.8	88818.3	92331.1	63121.9	85368.6	95158.5	93463.7	57340.3	106200	84372.1	89544.4	91235.6	C11713	HMDB0012322	8663	135-19-3	10432	-
MEDN2150	2-O-α-D-glucopyranosyl-L-ascorbic acid	2-O-α-D-吡喃葡萄糖基-L-抗坏血酸	Carbohydrates and Its metabolites	碳水化合物及其代谢物	Sugar derivatives	糖衍生物	337.1	338.085	[M-H]-	C12H18O11	2	221091	189584	187621	209031	180027	223204	179208	250891	230348	159610	185041	214270	C18339	-	54693473	129499-78-1	-	-
MEDP0789	2-Pentyl-3-phenyl-2-propenal	α-戊基肉桂醛	Aldehyde,Ketones,Esters	醛、酮、酯类	Aldehydes	醛类	203.4	202.136	[M+H]+	C14H18O	2	151653	208478	164766	205141	261655	176880	164321	187966	183306	164999	187223	244418	C12288	HMDB0031313	1712058	122-40-7	32318	-
MEDN2351	2-Phospho-D-glyceric acid	2-磷酸-D-甘油酸	Organic acid And Its derivatives	有机酸及其衍生物	Phosphoric acids	磷酸类化合物	184.9	185.993	[M-H]-	C3H7O7P	2	55738.9	23165.6	37003	66665.4	42283.7	52973.1	62873.3	44652.3	42439.1	68283.9	55784.9	64611	C00631	HMDB0003391	439278	3443-57-0	17835	6915
MEDN0098	2-Picolinic Acid	2-吡啶甲酸	Heterocyclic compounds	杂环化合物	Pteridines and derivatives	蝶啶及其衍生物	122	123.032	[M-H]-	C6H5NO2	2	3.95779e+06	4.30479e+06	4.44184e+06	4.26349e+06	4.64938e+06	4.49246e+06	4.52239e+06	4.35569e+06	4.84914e+06	4.08102e+06	3.99493e+06	4.21506e+06	C10164	HMDB0002243	1018	98-98-6	28747	-
MEDP2697	2-Thio-PAF	1-O-十六烷基-2-脱氧-2-硫代-S-乙酰-sn-甘油基-3-磷酰胆碱	FA	脂肪酰类	Others	其他	522.3	539.341	[M+H-H2O]+	C26H54NO6PS	2	4.06838e+07	4.49507e+07	4.36893e+07	5.36837e+07	5.68347e+07	5.01549e+07	4.45719e+07	4.84977e+07	4.95251e+07	3.69965e+07	3.94412e+07	4.07074e+07	-	-	10347222	-	-	-
MEDP0781	2-Undecanone	2-十一烷酮	Aldehyde,Ketones,Esters	醛、酮、酯类	Ketones	酮类	171.1	170.167	[M+H]+	C11H22O	2	35907.1	42288.2	89766.2	32390	54867.5	39747.6	71770	55852.4	56783.4	67526.3	42760.7	79030	C01875	HMDB0033713	8163	112-12-9	17700	-
MEDP2439	2-amino-6-chloropurine	2-氨基-6-氯嘌呤	Nucleotide And Its metabolites	核苷酸及其代谢物	Nucleotide And Its metabolites	核苷酸及其代谢物	170	169.016	[M+H]+	C5H4ClN5	1	183345	143057	199158	171777	257358	175396	204399	162473	178139	119441	174523	178567	-	-	5360349	10310-21-1	-	-
MEDP2454	2-amino-6-methylmercaptopurine	2-氨基-6-甲基巯基嘌呤	Nucleotide And Its metabolites	核苷酸及其代谢物	Nucleotide And Its metabolites	核苷酸及其代谢物	182	181.042	[M+H]+	C6H7N5S	2	137960	114324	110421	146867	134409	128007	108283	159654	147056	114669	105605	106543	-	-	70976	1198-47-6	-	-
MEDN1148*052	2-hydroxyhexadecanoic acid	2-羟基十六酸	FA	脂肪酰类	FFA	游离脂肪酸	271.2	272.235	[M-H]-	C16H32O3	1	33396.6	35801.8	33143.5	34058.2	32220.3	36017.5	37983.9	34244.4	30955.7	35236.2	37092.4	38977.7	D84003	HMDB0031057	92836	764-67-0	75972	-
MEDP1272	20,26-dihydroxyecdysone	20,26-二羟基蜕皮激素	Hormones and hormone related compounds	激素及激素相关物质	Hormones and hormone related compounds	激素及激素相关物质	497.3	496.304	[M+H]+	C27H44O8	2	644543	713192	678661	1.06328e+06	836858	731256	854884	934940	1.00761e+06	713874	676143	628513	C16500	-	47205796	19458-46-9	-	-
MEDN0775*057	20-HETE	20-羟基-5Z,8Z,11Z,14Z-二十碳四烯酸	FA	脂肪酰类	Oxidized lipids	氧化脂质	319.2	320.235	[M-H]-	C20H32O3	2	151776	140618	502502	605728	286608	555071	702036	806118	171788	473281	386265	358808	C14748	HMDB0005998	5283157	79551-86-3	34306	-
MEDN1817	20-Hydroxy Prostaglandin F2α	20-羟基前列腺素F2α	FA	脂肪酰类	Oxidized lipids	氧化脂质	369.2	370.236	[M-H]-	C20H34O6	2	263603	242505	341188	350622	362315	265579	329994	347387	345082	241442	336027	328056	-	-	5283040	57930-92-4	-	-
MEDP0152	3'-Adenylic acid	腺苷-3'-磷酸	Nucleotide And Its metabolites	核苷酸及其代谢物	Nucleotide And Its metabolites	核苷酸及其代谢物	348	347.063	[M+H]+	C10H14N5O7P	1	1.18208e+06	1.41089e+06	3.09428e+06	2.98756e+06	1.29271e+06	3.47433e+06	2.955e+06	3.88429e+06	2.03028e+06	2.14011e+06	2.30146e+06	2.33284e+06	C01367	HMDB0003540	41211	84-21-9	28931	-
MEDP2728	3,4-Dichloroaniline	3,4-二氯苯胺	Benzene and substituted derivatives	苯及其衍生物	Benzene and substituted derivatives	苯及其衍生物	162	160.98	[M+H]+	C6H5Cl2N	2	400694	340218	404709	367106	404625	305688	373558	338270	370991	331240	331163	339398	-	-	7257	95-76-1	-	-
MEDP2105	3,6,9,12,15,18,21-Heptaoxatricosane-21,23-diol	3,6,9,12,15,18,21-七氧杂二十三烷-21,23-二醇	Benzene and substituted derivatives	苯及其衍生物	Benzene and substituted derivatives	苯及其衍生物	371.2	370.22	[M+H]+	C16H34O9	1	880823	943719	818290	884816	761070	665704	766768	859930	816221	400791	415354	403913	-	-	78798	5117-19-1	-	-
MEDN1706	3-(2-Hydroxyphenyl)propanoic acid	3-(2-羟苯基)丙酸	Benzene and substituted derivatives	苯及其衍生物	Phenolic acids	酚酸类	165.1	166.063	[M-H]-	C9H10O3	1	1.02752e+08	1.04767e+08	1.0951e+08	1.07692e+08	1.12829e+08	9.84948e+07	1.06793e+08	1.0981e+08	1.11704e+08	9.20409e+07	9.75574e+07	1.01064e+08	C01198	HMDB0033752	873	495-78-3	16104	-
MEDN0080	3-(4-hydroxyphenyl)acrylaldehyde	3-（4-羟苯基）丙烯醛	Benzene and substituted derivatives	苯及其衍生物	Benzene and substituted derivatives	苯及其衍生物	147	148.052	[M-H]-	C9H8O2	2	803249	791057	809344	842398	809270	777472	852652	845186	842612	761384	845108	809114	C05608	HMDB0040986	641301	2538-87-6	28353	-
MEDP2361	3-(imidazol-4-yl)propionic acid	3-(咪唑-4-基)丙酸	Heterocyclic compounds	杂环化合物	Heterocyclic compounds	杂环化合物	141.1	140.059	[M+H]+	C6H8N2O2	1	555452	428620	536308	389309	269905	553854	269979	481886	458466	376553	253303	330845	C20522	HMDB0002271	70630	1074-59-5	73087	6585
MEDN1246	3-(pyrazol-1-yl)-L-alanine	3-(吡唑-1-基)-L-丙氨酸	Amino acid and Its metabolites	氨基酸及其代谢物	Amino acid derivatives	氨基酸衍生物	154.1	155.069	[M-H]-	C6H9N3O2	2	9	9	9	4929.35	5490.48	5062.43	5282.6	4127.9	9	1675.37	4172.55	2957.31	C01162	-	151491	2734-48-7	-	-
MEDP2182	3-Aminopropionitrile	3-氨基丙腈	Alcohol and amines	醇、胺类	Amines	胺类	71.1	70.0531	[M+H]+	C3H6N2	2	77639.4	47355.9	77049.3	70340.1	65051.6	66719.6	59402.2	72047.1	61534.7	79553.9	62362.9	72282.1	C05670	HMDB0004101	1647	151-18-8	27413	7017
MEDP2104	3-Aminoquinoline	3-氨基喹啉	Benzene and substituted derivatives	苯及其衍生物	Benzene and substituted derivatives	苯及其衍生物	145.1	144.069	[M+H]+	C9H8N2	2	51577.9	54461.7	50749	58394.6	76121.1	40777.6	37396.3	57859.3	55680.2	42969.6	44974.1	62968	C09183	HMDB0036827	11375	580-17-6	9053	-
MEDP1132	3-Carboxypropyltrimethylammonium	3-羧丙基三甲基铵	Organic acid And Its derivatives	有机酸及其衍生物	Organic acid And Its derivatives	有机酸及其衍生物	146.1	145.11	[M+H]+	C7H15NO2	1	35119.2	20274.6	27018.9	30953.1	47760.4	20958.3	40790.8	43010.7	29160.8	20084.7	30761.4	31389.6	D83216	-	22620	6249-56-5	-	-
MEDP0669	3-Chloroaniline	3-氯苯胺	Benzene and substituted derivatives	苯及其衍生物	Benzene and substituted derivatives	苯及其衍生物	128.1	127.019	[M+H]+	C6H6ClN	1	6.20827e+07	5.96707e+07	6.36004e+07	6.06345e+07	6.68057e+07	5.38873e+07	5.93092e+07	6.33573e+07	6.13477e+07	5.49833e+07	5.43832e+07	5.77956e+07	-	-	7932	108-42-9	-	-
MEDP2347	3-Guanidinopropionic acid	3-胍基丙酸	Organic acid And Its derivatives	有机酸及其衍生物	Organic acid And Its derivatives	有机酸及其衍生物	132.1	131.069	[M+H]+	C4H9N3O2	1	1.80369e+06	1.79107e+06	1.72224e+06	1.70481e+06	2.07286e+06	2.02305e+06	1.93298e+06	1.83304e+06	1.8909e+06	2.07093e+06	1.67447e+06	1.79937e+06	C03065	HMDB0013222	67701	353-09-3	15968	-
MEDN0290	3-Hydroxy-3-Methyl Butyric Acid	3-羟基-3-甲基丁酸	Organic acid And Its derivatives	有机酸及其衍生物	Organic acid And Its derivatives	有机酸及其衍生物	117.1	118.063	[M-H]-	C5H10O3	1	538053	587895	325788	447651	398116	569372	443210	598029	563225	475765	476723	647112	C20827	HMDB0000754	69362	625-08-1	37084	5722
MEDP2538*130	3-Hydroxy-L-phenylalanine	3-羟基-L-苯丙氨酸	Amino acid and Its metabolites	氨基酸及其代谢物	Amino acid derivatives	氨基酸衍生物	182.1	181.074	[M+H]+	C9H11NO3	1	659392	752871	1.05644e+06	992903	623047	608277	1.07395e+06	844353	907748	1.18016e+06	1.0895e+06	1.12185e+06	C20807	-	6950578	587-33-7	-	-
MEDN1504	3-Hydroxycinnamic acid	3-羟基肉桂酸	Organic acid And Its derivatives	有机酸及其衍生物	Organic acid And Its derivatives	有机酸及其衍生物	163	164.047	[M-H]-	C9H8O3	2	194588	207386	187736	176778	210326	188287	190288	194991	203978	175669	168784	172440	C12621	HMDB0001713	637541	14755-02-3	32357	305
MEDN0820*019	3-Hydroxyglutaric acid	3-羟基戊二酸	Organic acid And Its derivatives	有机酸及其衍生物	Organic acid And Its derivatives	有机酸及其衍生物	147	148.037	[M-H]-	C5H8O5	2	57941.7	41736.9	66407.6	50441.7	50747.6	71266	47222.8	77811.2	53535.5	56063.8	74301.8	71608.5	-	HMDB0000428	181976	638-18-6	-	5417
MEDN0429	3-Hydroxyhippuric Acid	3-羟基马尿酸	Amino acid and Its metabolites	氨基酸及其代谢物	Amino acid derivatives	氨基酸衍生物	194	195.053	[M-H]-	C9H9NO4	1	53065.9	47079.6	42014.3	37523.9	42511.8	45803.4	54611.7	47450	46546.8	40935.7	37117.2	32377.4	-	HMDB0006116	450268	1637-75-8	70824	-
MEDP1898	3-Hydroxyphenylurea	3-羟基苯基脲	Benzene and substituted derivatives	苯及其衍生物	Benzene and substituted derivatives	苯及其衍生物	153.1	152.059	[M+H]+	C7H8N2O2	2	1.09415e+08	9.3802e+07	9.65525e+07	9.73495e+07	1.2389e+08	9.79367e+07	1.02135e+08	1.20827e+08	1.14373e+08	1.13611e+08	1.08926e+08	1.05894e+08	-	-	12796	701-82-6	-	-
MEDN0293	3-Hydroxypropanoic Acid	3-羟基丙酸	Organic acid And Its derivatives	有机酸及其衍生物	Organic acid And Its derivatives	有机酸及其衍生物	89	90.032	[M-H]-	C3H6O3	2	24185.4	12509.7	18945.6	30904.5	28544.7	30330.2	16265.7	27285.8	27183	30136.3	32362.9	30780.9	C01013	HMDB0000700	68152	503-66-2	33404	5668
MEDP0270	3-Indolebutyric Acid	吲哚-3-丁酸	Heterocyclic compounds	杂环化合物	Indole and Its derivatives	吲哚及其衍生物	204.1	203.095	[M+H]+	C12H13NO2	1	1.38982e+07	1.44064e+07	1.48708e+07	1.40427e+07	1.43903e+07	11889950	1.4415e+07	1.33916e+07	1.43758e+07	1.28774e+07	1.21447e+07	1.10942e+07	C11284	HMDB0002096	8617	133-32-4	33070	6485
MEDN2037*028	3-Methoxyphenylacetic acid	3-甲氧基苯乙酸	Organic acid And Its derivatives	有机酸及其衍生物	Organic acid And Its derivatives	有机酸及其衍生物	165.1	166.063	[M-H]-	C9H10O3	2	105798	153922	132318	146149	164457	101679	115221	173601	127348	137498	145820	154374	-	HMDB0059969	15719	1798-09-0	-	-
MEDP0894	3-Methoxytyramine	3-甲氧基酪胺	Benzene and substituted derivatives	苯及其衍生物	Phenolics	苯酚类	168.1	167.095	[M+H]+	C9H13NO2	2	42784.4	44259	38821.9	59180.1	36347.2	32202.4	73482	44525.1	60675.6	42986.6	54709.8	48320.7	C05587	HMDB0000022	1669	1477-68-5	742324	5094
MEDP2524	3-Methylthiopropylamine	3-甲基硫代丙胺	Alcohol and amines	醇、胺类	Amines	胺类	106.1	105.061	[M+H]+	C4H11NS	2	187327	137831	97181.5	140854	140083	105231	137450	136664	122616	184850	135225	136440	C03354	-	77743	4104-45-4	-	-
MEDP2142	3-acetylphenylboronic acid	3-乙酰基苯硼酸	Benzene and substituted derivatives	苯及其衍生物	Benzene and substituted derivatives	苯及其衍生物	165.1	163.97	[M+H]+	C8H9BO3	2	121196	133753	116307	130861	151690	144536	162691	110639	167424	133933	129046	131335	-	-	2734310	204841-19-0	-	-
MEDP2408	3-aminobenzamide	3-氨基苯甲酰胺	Benzene and substituted derivatives	苯及其衍生物	Benzene and substituted derivatives	苯及其衍生物	137.1	136.064	[M+H]+	C7H8N2O	2	110584	126268	96355.9	191031	340883	254815	105246	96396.8	183921	193199	197988	168583	-	-	1645	3544-24-9	-	-
MEDN1771	4,4'-Dihydroxybenzophenone	4,4'-二羟基二苯甲酮	Benzene and substituted derivatives	苯及其衍生物	Benzene and substituted derivatives	苯及其衍生物	213.1	214.063	[M-H]-	C13H10O3	2	122334	112038	115269	111203	119329	108113	112287	116143	135354	128972	124718	127099	C14220	-	69150	611-99-4	-	-
MEDP2211	4-(4-Hydroxyaniline)-6,7-Dimethoxyquinazoline-JANEX-1	4-(4-羟基苯胺)-6,7-二甲氧基喹唑啉-JANEX-1	Benzene and substituted derivatives	苯及其衍生物	Benzene and substituted derivatives	苯及其衍生物	298.1	297.111	[M+H]+	C16H15N3O3	2	1.47751e+06	1.35028e+06	1.50336e+06	1.38019e+06	1.52446e+06	1.21006e+06	1.41876e+06	1.40806e+06	1.57026e+06	1.30786e+06	1.25021e+06	1.29673e+06	-	-	3794	202475-60-3	-	-
MEDP2647	4-(Hydroxyamino)quinoline 1-oxide	4-（羟基氨基）喹啉1-氧化物	Benzene and substituted derivatives	苯及其衍生物	Benzene and substituted derivatives	苯及其衍生物	177.1	176.059	[M+H]+	C9H8N2O2	2	94560.6	77597.5	72366.8	59264.9	105635	71899.3	86489.7	66368.3	109031	71482.4	68282.9	66861.6	-	-	5360001	4637-56-3	-	-
MEDP2527	4-Amino-3-hydroxybutyric acid	4-氨基-3-羟基丁酸	Others	其他	Medicine	药物	120.1	119.058	[M+H]+	C4H9NO3	1	36417.3	40823.7	48833.7	63199.8	55667	31450.7	47795.6	52903.5	56725.1	63309.4	75760.6	42518.1	C03678	-	2149	924-49-2	-	-
MEDP2364	4-Amino-5-hydroxymethyl-2-methylpyrimidine	4-氨基-5-羟基甲基-2-甲基嘧啶	Heterocyclic compounds	杂环化合物	Heterocyclic compounds	杂环化合物	140.1	139.075	[M+H]+	C6H9N3O	2	497577	408116	343729	440397	379968	554154	628841	235989	640233	580716	452385	530492	C01279	HMDB0247327	777	73-67-6	-	-
MEDN1510	4-Ethyloctanoic acid	4-乙基辛酸	Organic acid And Its derivatives	有机酸及其衍生物	Organic acid And Its derivatives	有机酸及其衍生物	171.1	172.146	[M-H]-	C10H20O2	2	1.56682e+07	1.68084e+07	1.6099e+07	1.60086e+07	15678765	1.59876e+07	1.61571e+07	1.64805e+07	1.6425e+07	1.61415e+07	1.68153e+07	1.61982e+07	-	HMDB0036136	61840	16493-80-4	-	-
MEDN0128	4-Hydroxy-3-methoxybenzaldehyde	4-羟基-3-甲氧基苯甲醛	Benzene and substituted derivatives	苯及其衍生物	Phenolics	苯酚类	151	152.047	[M-H]-	C8H8O3	1	72517.8	60707.3	64114.6	62941	63258.3	62629.5	53911.7	60445.6	117150	65329.5	81975.9	77147.5	C00755	HMDB0012308	1183	121-33-5	18346	-
MEDP2703	4-Hydroxy-4-(pyridin-2-yl)butan-2-one	4-羟基-4-（吡啶-2-基）丁-2-酮	Heterocyclic compounds	杂环化合物	Pyridine and pyridine derivatives	吡啶及其衍生物	188.1	165.079	[M+Na]+	C9H11NO2	2	4.10051e+06	4.21974e+06	4.82118e+06	4.44199e+06	4.1063e+06	3.93674e+06	3.97478e+06	4.52499e+06	4.30283e+06	3.66649e+06	3.72628e+06	3.70652e+06	-	-	236022	6337-41-3	-	-
MEDN0410	4-Hydroxybenzaldehyde	4-羟基苯甲醛	Benzene and substituted derivatives	苯及其衍生物	Benzene and substituted derivatives	苯及其衍生物	121	122.037	[M-H]-	C7H6O2	1	173689	184513	180424	191613	189281	180110	185069	190908	184287	180586	180225	198330	C00633	HMDB0011718	126	123-08-0	17597	-
MEDN1909	4-Hydroxybenzoic Acid	4-羟基苯甲酸	Benzene and substituted derivatives	苯及其衍生物	Phenolic acids	酚酸类	137	138.032	[M-H]-	C7H6O3	1	222263	194261	219926	232367	221354	227464	226122	240408	243977	222255	215422	236712	C00156	HMDB0000500	135	99-96-7	30763	5486
MEDN1331*028	4-Methoxyphenylacetic acid	4-甲氧基苯乙酸	Organic acid And Its derivatives	有机酸及其衍生物	Organic acid And Its derivatives	有机酸及其衍生物	165	166.063	[M-H]-	C9H10O3	2	105798	153922	132318	146149	164457	101679	115221	173601	127348	137498	145820	154374	D70488	HMDB0002072	7690	104-01-8	55501	6472
MEDN1092	4-acetoxyphenol	4-乙酰氧基苯酚	Benzene and substituted derivatives	苯及其衍生物	Phenolics	苯酚类	151	152.047	[M-H]-	C8H8O3	2	33514.5	33590.8	8984.51	69800.2	93631.3	94729.5	45146.2	49390.6	38542.1	40995.1	51255.1	45496.6	C13636	-	96009	3233-32-7	-	-
MEDN1199*028	4-hydroxyphenylglyoxylate	4-羟基苯乙醛酸酯	Benzene and substituted derivatives	苯及其衍生物	Phenolic acids	酚酸类	165	166.027	[M-H]-	C8H6O4	2	105798	153922	132318	146149	164457	101679	115221	173601	127348	137498	145820	154374	C03590	-	355	15573-67-8	-	-
MEDN0731*042	4-tert-Octylphenol	4-(1,1,3,3-四甲基丁基)苯酚	Benzene and substituted derivatives	苯及其衍生物	Phenolics	苯酚类	205.2	206.167	[M-H]-	C14H22O	2	102640	118452	110339	87819.5	108293	123544	115482	85881.6	93588.4	240549	207785	229693	C14205	HMDB0013825	8814	140-66-9	-	-
MEDP0401	5'-Deoxy-5'-(Methylthio) Adenosine	5-脱氧-5-甲硫腺苷	Nucleotide And Its metabolites	核苷酸及其代谢物	Nucleotide And Its metabolites	核苷酸及其代谢物	298	297.09	[M+H]+	C11H15N5O3S	1	5.59404e+06	6.06132e+06	5.40165e+06	5.1599e+06	5.14432e+06	4.99264e+06	4.73433e+06	4.93273e+06	5.50518e+06	5.41091e+06	5.82726e+06	5.22736e+06	C00170	HMDB0001173	439176	2457-80-9	17509	3425
MEDP1202	5'-Deoxy-5'-fluoroadenosine	5'-脱氧-5'-氟腺苷	Nucleotide And Its metabolites	核苷酸及其代谢物	Nucleotide And Its metabolites	核苷酸及其代谢物	270.1	269.092	[M+H]+	C10H12FN5O3	2	127014	150137	233355	334842	154674	275325	245159	340723	136232	204345	228313	228133	C19766	-	448403	731-98-6	-	-
MEDN1022	5,6-Dimethylbenzimidazole	5,6-二甲基苯并咪唑	Heterocyclic compounds	杂环化合物	Heterocyclic compounds	杂环化合物	145.1	146.084	[M-H]-	C9H10N2	2	33622.8	22795.9	35192.8	23703.4	21089.9	31032.9	30074	33112	21906	29634.1	26498.2	32742	C03114	HMDB0003701	675	582-60-5	15890	-
MEDP2540	5-Acetylamino-6-amino-3-methyluracil	5-乙酰氨基-6-氨基-3-甲基尿嘧啶	Nucleotide And Its metabolites	核苷酸及其代谢物	Nucleotide and Its metabolites	核苷酸及其代谢物	199.1	198.075	[M+H]+	C7H10N4O3	2	154480	280755	220056	202436	193724	222421	198560	256169	134867	245715	171731	178642	C16366	HMDB0004400	88299	19893-78-8	-	-
MEDN1908	5-Carboxyvanillic Acid	5-羧香草酸	Organic acid And Its derivatives	有机酸及其衍生物	Organic acid And Its derivatives	有机酸及其衍生物	211	212.032	[M-H]-	C9H8O6	2	117937	106364	96298.9	95690.4	97879.8	91778.4	100344	96165.4	85582.9	119938	100091	98627.7	C18338	-	16488	2134-91-0	-	-
MEDN1513	5-Hydroxy-2'-deoxyuridine	5-羟基-2'-脱氧尿苷	Nucleotide And Its metabolites	核苷酸及其代谢物	Nucleotide And Its metabolites	核苷酸及其代谢物	243.1	244.07	[M-H]-	C9H12N2O6	2	5250.47	3465.34	14237.1	17231.3	8660.87	14808.1	12840.5	21716.1	6554.83	6803.07	6803.83	7391.51	-	-	96622	5168-36-5	-	-
MEDN2281	5-Hydroxyindolepyruvate	5-羟基吲哚丙酮酸	Heterocyclic compounds	杂环化合物	Indole and Its derivatives	吲哚及其衍生物	218	219.053	[M-H]-	C11H9NO4	2	3.82933e+06	3.58657e+06	3.8371e+06	4.35713e+06	4.15338e+06	3.30672e+06	4.46421e+06	4.13701e+06	3.79262e+06	3.50322e+06	3.73259e+06	3.77065e+06	C05646	-	440742	-	-	-
MEDN2326	5-Hydroxyisourate	5-羟基异尿酸	Organic acid And Its derivatives	有机酸及其衍生物	Organic acid And Its derivatives	有机酸及其衍生物	183	184.023	[M-H]-	C5H4N4O4	2	10726.6	16592.9	17868.2	20386.3	11289.9	28763.2	18957.8	26297.8	9676.44	25624.7	26814.1	18776	C11821	HMDB0030097	250388	6960-30-1	18072	-
MEDP1467	5-Methyl-2'-deoxycytidine	5-甲基-2'-脱氧胞苷	Nucleotide And Its metabolites	核苷酸及其代谢物	Nucleotide And Its metabolites	核苷酸及其代谢物	242	241.106	[M+H]+	C10H15N3O4	1	28186.7	29963.9	31424.8	50008.6	44768.4	35806.6	28541.3	39336.9	33709	20243.6	48672.7	34160.6	C03592	HMDB0002224	440055	838-07-3	27964	-
MEDP0155	5-Methylcytosine	5-甲基胞嘧啶	Nucleotide And Its metabolites	核苷酸及其代谢物	Nucleotide And Its metabolites	核苷酸及其代谢物	126.1	125.059	[M+H]+	C5H7N3O	1	110291	125244	115075	119620	295363	96879.3	75809.3	110141	91041.5	130917	114535	125093	C02376	HMDB0002894	65040	554-01-8	27551	3247
MEDN1239	5-O-(1-carboxyvinyl)-3-phosphate	5-O-(1-羧基乙烯基)-3-磷酸酯	Organic acid And Its derivatives	有机酸及其衍生物	Phosphoric acids	磷酸类化合物	323	324.025	[M-H]-	C10H13O10P	2	204184	181309	581801	516088	279123	526265	541831	719167	279883	435614	299293	406769	C01269	-	439463	89771-75-5	-	-
MEDP0036	5-Oxoproline	5-氧化脯氨酸	Amino acid and Its metabolites	氨基酸及其代谢物	Amino acid derivatives	氨基酸衍生物	130	129.043	[M+H]+	C5H7NO3	1	192289	161009	211466	232031	171438	537598	258767	274720	195025	237242	185240	138325	C02237	HMDB0000805	499	149-87-1	-	-
MEDN1858	6,6'-Dihydroxy-5,5'-dimethoxybiphenyl-3,3'-dicarboxylic acid	6,6'-二羟基-5,5'-二甲氧基联苯-3,3'-二羧酸	Benzene and substituted derivatives	苯及其衍生物	Benzene and substituted derivatives	苯及其衍生物	333.1	334.069	[M-H]-	C16H14O8	2	30877.3	30173.8	35404.1	32513.5	35055.9	30930.1	35427.7	33944.5	39361.3	31975.6	29441.1	38114.1	C18347	-	16487	2134-90-9	-	-
MEDP0298*114	6-Aminocaproic Acid	6-氨基己酸	Amino acid and Its metabolites	氨基酸及其代谢物	Amino acid derivatives	氨基酸衍生物	132.1	131.095	[M+H]+	C6H13NO2	1	3.40163e+06	3.2858e+06	6.1759e+06	5.17777e+06	3.00709e+06	4.02389e+06	6.88063e+06	6.50506e+06	4.08695e+06	4.6788e+06	4.32607e+06	4.33828e+06	C02378	HMDB0001901	564	60-32-2	16586	-
MEDP0526	6-Dimethylaminopurine	6-二甲基氨基嘌呤	Nucleotide And Its metabolites	核苷酸及其代谢物	Nucleotide And Its metabolites	核苷酸及其代谢物	164.1	163.086	[M+H]+	C7H9N5	2	3.05091e+06	2878676	2.87738e+06	2.89794e+06	2.98195e+06	2.77212e+06	3.00509e+06	3.1108e+06	3.11257e+06	2.92219e+06	2.76907e+06	2.87252e+06	-	HMDB0000473	3134	938-55-6	60281	5460
MEDN1516	6-Hydroxyflavone (6-HF)	6-羟基黄酮	Benzene and substituted derivatives	苯及其衍生物	Benzene and substituted derivatives	苯及其衍生物	237.1	238.063	[M-H]-	C15H10O3	2	20637.9	10458.1	82843.6	724333	22193.5	21842.2	53454.1	17350.7	23245	92610.3	80130.5	95882.8	C14137	HMDB0141530	72279	6665-83-4	34472	-
MEDN0100	6-Hydroxynicotinic Acid	6-羟基烟酸	CoEnzyme and vitamins	辅酶和维生素	CoEnzyme and vitamins	辅酶和维生素	138	139.027	[M-H]-	C6H5NO3	2	16043.3	15597.1	14461.4	9404.96	23505.7	13635.9	18396.6	10565.4	11670	26513.2	35317.9	30068	C01020	HMDB0002658	72924	5006-66-6	16168	-
MEDP0821	6-Methylnicotinamide	6-甲基烟酰胺	Heterocyclic compounds	杂环化合物	Pteridines and derivatives	蝶啶及其衍生物	137.1	136.064	[M+H]+	C7H8N2O	1	126957	107986	113032	205900	352693	320063	119555	165462	154249	173024	159376	153214	-	HMDB0013704	96351	6960-22-1	88954	-
MEDP2691	6-Methylthiopurine 5'-monophosphate ribonucleotide	6-甲基硫嘌呤5′-单磷酸核糖核苷酸	Nucleotide And Its metabolites	核苷酸及其代谢物	Nucleotide And Its metabolites	核苷酸及其代谢物	420.1	378.04	[M+CH3CN+H]+	C11H15N4O7PS	2	2.04896e+07	2.13088e+07	2.17793e+07	2.14835e+07	2.5384e+07	1.91141e+07	2.12863e+07	2.22473e+07	1.56429e+07	2.14779e+07	1.75035e+07	2.01363e+07	-	HMDB0060414	10091038	7021-52-5	80609	-
MEDP1073*124	6-O-methylguanine	6-O-甲基鸟嘌呤	Nucleotide And Its metabolites	核苷酸及其代谢物	Nucleotide And Its metabolites	核苷酸及其代谢物	166.1	165.065	[M+H]+	C6H7N5O	1	357418	403036	393963	332984	392541	421088	198576	215867	160826	289281	260025	232503	-	-	65275	20535-83-5	-	-
MEDN2341	6-Phosphogluconic acid	6-磷酸葡萄糖酸	Organic acid And Its derivatives	有机酸及其衍生物	Phosphoric acids	磷酸类化合物	274.8	276.025	[M-H]-	C6H13O10P	2	1.08634e+07	1.04867e+07	1.01722e+07	8.89308e+06	6.77131e+06	8.01505e+06	9.17369e+06	8.28757e+06	1.00878e+07	8.05924e+06	9.40785e+06	9.36548e+06	C00345	HMDB0001316	91493	921-62-0	48928	367
MEDN0611	6β-hydroxytestosterone	6-β-羟基睾酮	Hormones and hormone related compounds	激素及激素相关物质	Hormones and hormone related compounds	激素及激素相关物质	303.2	304.204	[M-H]-	C19H28O3	2	8031.65	6365.61	6423.36	5906.27	7088.48	4461.48	5935.07	6376.41	5778.01	25070.7	27832.8	25346.1	C14497	HMDB0006259	65543	62-99-7	34477	-
MEDP0540	7,8-dihydro-L-Biopterin	7,8-二氢-L-生物蝶呤	Heterocyclic compounds	杂环化合物	Pteridines and derivatives	蝶啶及其衍生物	240.1	239.102	[M+H]+	C9H13N5O3	1	4831.14	3122.56	1670	5771.44	6339.67	8989.24	14102.7	3407.69	4239.18	6383.3	2651.46	6201.36	C02953	HMDB0000038	135402011	6779-87-9	64277	5106
MEDP1960	7-(alpha-D-glucosyl)-N(6)-isopentenyladenine	7-（α-D-葡萄糖基）-N（6）-异戊烯基亚丁	Nucleotide And Its metabolites	核苷酸及其代谢物	Nucleotide And Its metabolites	核苷酸及其代谢物	366.2	365.17	[M+H]+	C16H23N5O5	1	9.76993e+07	108340341	1.25218e+08	1.22192e+08	7.97113e+07	1.28556e+08	8.60947e+07	1.34024e+08	1.28922e+08	1.26294e+08	9.39659e+07	1.24705e+08	-	-	25202675	-	-	-
MEDP2625	7-Amino-4-methylcoumarin	7-氨基-4-甲基香豆素	Benzene and substituted derivatives	苯及其衍生物	Benzene and substituted derivatives	苯及其衍生物	176.1	175.063	[M+H]+	C10H9NO2	2	131587	117794	149176	133612	139779	135361	122872	120470	120570	131163	111099	122758	C01386	HMDB0247230	92249	26093-31-2	-	-
MEDP2796	7-Ketocholesterol	7-酮胆固醇	Hormones and hormone related compunds	激素及激素相关物质	Hormones and hormone related compounds	激素及激素相关物质	383.3	400.334	[M+H-H2O]+	C27H44O2	2	1.34435e+06	1.42277e+06	1.32743e+06	1.38663e+06	1.42246e+06	1.42366e+06	1.57091e+06	1.55394e+06	1.52633e+06	1.21345e+06	1.48985e+06	1.6166e+06	-	HMDB0000501	91474	566-28-9	-	5487
MEDN1012	7-Methylguanine	7-甲基鸟嘌呤	Nucleotide And Its metabolites	核苷酸及其代谢物	Nucleotide And Its metabolites	核苷酸及其代谢物	164.1	165.065	[M-H]-	C6H7N5O	2	13580.7	9357.59	11686.6	17255.1	13632.3	10164.8	6977.24	10168.2	8187.24	8624.76	16689.7	11763.6	C02242	HMDB0000897	135398679	578-76-7	28664	-
MEDP1072*159	7-Methylguanosine	7-甲基鸟苷	Nucleotide And Its metabolites	核苷酸及其代谢物	Nucleotide And Its metabolites	核苷酸及其代谢物	298.1	297.107	[M+H]+	C11H15N5O5	1	68025.6	89804	81632.6	134460	73425.6	40383.7	72843.2	87528	76428.5	106922	80458.3	96655.8	-	HMDB0001107	135445750	20244-86-4	20794	6008
MEDP0299	7-Methyluric Acid	7-甲基尿酸	Amino acid and Its metabolites	氨基酸及其代谢物	Amino acid derivatives	氨基酸衍生物	183	182.044	[M+H]+	C6H6N4O3	2	1.51038e+06	1.31545e+06	1.3595e+06	1.40414e+06	1.34289e+06	1.4694e+06	1.44081e+06	1.36429e+06	1.35037e+06	1.45017e+06	1.42052e+06	1.45452e+06	C16355	HMDB0011107	69160	612-37-3	149744	-
MEDN0494	8,15-Dihete	8,15-二羟基二十碳四烯酸	FA	脂肪酰类	FFA	游离脂肪酸	335.2	336.23	[M-H]-	C20H32O4	1	6.47749e+06	6.28642e+06	6.38788e+06	7.63825e+06	7.84425e+06	8.48577e+06	7.58743e+06	6.66284e+06	6.99379e+06	6.65001e+06	7.31599e+06	7.52114e+06	-	HMDB0010219	53480358	80234-65-7	88456	-
MEDN1398	8-Aminooctanoic Acid	8-氨基辛酸	Organic acid And Its derivatives	有机酸及其衍生物	Organic acid And Its derivatives	有机酸及其衍生物	158.1	159.126	[M-H]-	C8H17NO2	2	125144	107204	108724	135365	113433	110647	106260	132233	112971	89581.6	114687	124701	-	HMDB0247418	66085	1002-57-9	-	-
MEDP1498	8-Azaguanine	8-氮鸟嘌呤	Nucleotide And Its metabolites	核苷酸及其代谢物	Nucleotide And Its metabolites	核苷酸及其代谢物	153	152.045	[M+H]+	C4H4N6O	1	403832	242360	338318	587667	971374	730143	478939	470269	344339	523763	515999	535587	-	-	135403646	134-58-7	-	-
MEDP2089	8-Hydroxy-7-methoxycoumarin	8-羟基-7-甲氧基香豆素	Benzene and substituted derivatives	苯及其衍生物	Phenolics	苯酚类	193.1	192.042	[M+H]+	C10H8O4	2	107122	107858	109814	83940.4	114237	91484.4	96359.2	105935	102688	95457	127155	91583.4	-	HMDB0030692	146487	19492-03-6	-	-
MEDN0150	8-Hydroxyguanosine	8-羟基鸟苷	Nucleotide And Its metabolites	核苷酸及其代谢物	Nucleotide And Its metabolites	核苷酸及其代谢物	298.1	299.087	[M-H]-	C10H13N5O6	2	135103	130706	130493	152363	153267	153457	138902	139213	146250	122616	121928	128124	-	HMDB0002044	65131	3868-31-3	1177182	-
MEDN1426	9(S),12(S),13(S)-TriHOME	9,12,13-三羟基-十八碳单烯酸	FA	脂肪酰类	Oxidized lipids	氧化脂质	329.2	330.241	[M-H]-	C18H34O5	1	20604.8	34518.4	22956.5	31049.5	33816.9	33358.6	30463	35937.8	28508.8	27458.7	27167.6	28298.5	C14833	HMDB0004708	9858729	97134-11-7	34506	-
MEDN0376	9,10-DiHOME	(±)9,10-二羟基-12Z-十八碳烯酸	FA	脂肪酰类	Oxidized lipids	氧化脂质	313.2	314.246	[M-H]-	C18H34O4	2	23979.5	23041.1	18533	25477.5	28171.3	31928.3	20079.7	23318.1	23559.9	22211.3	25919.7	30144.5	C14828	HMDB0004704	9966640	-	-	-
MEDN0783*052	9,10-EpOME	(±)9,10-环氧-12Z-十八碳烯酸	FA	脂肪酰类	Oxidized lipids	氧化脂质	295.2	296.235	[M-H]-	C18H32O3	2	33396.6	35801.8	33143.5	34058.2	32220.3	36017.5	37983.9	34244.4	30955.7	35236.2	37092.4	38977.7	-	-	-	-	-	-
MEDN2319	9,10-Epoxy-18-hydroxyoctadecanoic acid	9,10-环氧-18-羟基十八酸	FA	脂肪酰类	Oxidized lipids	氧化脂质	313.2	314.246	[M-H]-	C18H34O4	2	15443.4	17896.1	17788.4	16165.5	27060.3	25000.1	15212.4	17289.5	16427.6	15154.4	15892.4	16451.5	-	-	9818312	3233-92-9	-	-
MEDN1854	9,10-dihydroxystearic acid	9,10-二羟基硬脂酸	FA	脂肪酰类	FFA	游离脂肪酸	315.3	316.261	[M-H]-	C18H36O4	2	36351.5	33841.8	28965.4	27405.3	31459.5	31901.1	36183.4	33911	29127.2	37652.7	34734	32479.3	C19622	-	89377	120-87-6	-	-
MEDN0398	AA	花生四烯酸	FA	脂肪酰类	Oxidized lipids	氧化脂质	303.2	304.24	[M-H]-	C20H32O2	1	4.64184e+06	4.59378e+06	4.86532e+06	4.89954e+06	445597	4.43847e+06	262588	4.20776e+06	376798	341387	347790	390577	C00219	HMDB0001043	444899	506-32-1	15843	193
MEDN1606	Acetanilide	乙酰苯胺	Benzene and substituted derivatives	苯及其衍生物	Benzene and substituted derivatives	苯及其衍生物	134.1	135.068	[M-H]-	C8H9NO	2	393494	383604	387316	411042	400674	359872	397614	383143	388272	354646	355547	401484	C07565	HMDB0001250	904	103-84-4	28884	6107
MEDP0159	Adenine	腺嘌呤	Nucleotide And Its metabolites	核苷酸及其代谢物	Nucleotide And Its metabolites	核苷酸及其代谢物	136.1	135.055	[M+H]+	C5H5N5	1	1.42396e+06	1.55847e+06	3.03746e+06	3.1831e+06	2.42546e+06	2.736e+06	2.39482e+06	2.7197e+06	2.86056e+06	1.83175e+06	1.94519e+06	1.88465e+06	C00147	HMDB0000034	190	73-24-5	16708	85
MEDP0160	Adenosine	腺苷	Nucleotide And Its metabolites	核苷酸及其代谢物	Nucleotide And Its metabolites	核苷酸及其代谢物	268.1	267.097	[M+H]+	C10H13N5O4	1	1.37579e+07	1.49504e+07	3.04676e+07	3.35001e+07	1.76528e+07	3.2285e+07	3.41066e+07	4.02495e+07	1.89108e+07	2.68905e+07	2.87106e+07	2.37393e+07	C00212	HMDB0000050	60961	58-61-7	16335	86
MEDP0161	Adenosine 5'-Diphosphate（ADP）	二磷酸腺苷	Nucleotide And Its metabolites	核苷酸及其代谢物	Nucleotide And Its metabolites	核苷酸及其代谢物	428	427.029	[M+H]+	C10H15N5O10P2	1	17504.9	2899.64	21225.2	35705.4	9930.83	57609.3	28001.6	7510.5	24215.9	22154.5	12348	30667.3	C00008	HMDB0001341	6022	58-64-0	16761	6175
MEDN0153	Adenosine 5'-Monophosphate	5'-腺嘌呤核苷酸	Nucleotide And Its metabolites	核苷酸及其代谢物	Nucleotide And Its metabolites	核苷酸及其代谢物	346.1	347.063	[M-H]-	C10H14N5O7P	1	265483	284526	930437	994587	421317	958903	900538	1.17853e+06	317099	587240	557425	667029	C00020	HMDB0000045	6083	61-19-8	16027	5111
MEDP1741	Agmatine	胍基丁胺	Alcohol and amines	醇、胺类	Polyamines	多胺	131.1	130.122	[M+H]+	C5H14N4	1	3.61561e+06	3.2299e+06	5.01726e+06	3.15478e+06	4.16742e+06	5.87454e+06	1161390	3.05055e+06	4.64615e+06	3.82274e+06	1.95658e+06	3.86502e+06	C00179	HMDB0001432	199	306-60-5	17431	3523
MEDP2543	Ala-Asn	L-丙氨酸-L-天冬氨酸	Amino acid and Its metabolites	氨基酸及其代谢物	Small Peptide	小肽	204.1	203.09	[M+H]+	C7H13N3O4	2	46995.7	52207.8	79701	69141.1	57748.3	54877.7	111275	73495.8	84946.7	70221.6	71119.4	68204.2	-	-	1549441	31796-57-3	-	-
MEDP2551	Ala-Met	L-丙氨酸-L-蛋氨酸	Amino acid and Its metabolites	氨基酸及其代谢物	Small Peptide	小肽	221.1	220.088	[M+H]+	C8H16N2O3S	2	8021.46	4893.04	15192.3	9133.41	3110.46	7825.2	13061.8	22334.5	12164.1	11275.6	13795.4	9674.7	-	-	85744	14486-05-6	-	-
MEDP1742	Ala-Phe	L-丙氨酰-L-苯丙氨酸	Amino acid and Its metabolites	氨基酸及其代谢物	Small Peptide	小肽	237.1	236.116	[M+H]+	C12H16N2O3	2	107774	121311	408388	377537	83081.5	263060	503241	434607	162077	244072	217924	257294	-	HMDB0028694	96814	3061-90-3	73807	-
MEDN0032	Allantoin	尿囊素	Organic acid And Its derivatives	有机酸及其衍生物	Organic acid And Its derivatives	有机酸及其衍生物	157	158.044	[M-H]-	C4H6N4O3	2	5.65237e+06	7.08469e+06	5.56854e+06	7.53945e+06	6.7623e+06	1.02038e+07	9	9	9	6.57326e+06	1.32285e+07	7.38434e+06	C01551	HMDB0000462	204	97-59-6	15676	89
MEDN0478	Aminomalonic Acid	氨基丙二酸	Organic acid And Its derivatives	有机酸及其衍生物	Organic acid And Its derivatives	有机酸及其衍生物	118	119.022	[M-H]-	C3H5NO4	2	136298	128482	164387	135467	168734	156083	148665	160032	141314	136061	137264	139120	C00872	HMDB0001147	100714	1068-84-4	17475	-
MEDP2685	Ammelide	三聚氰胺一酰胺	Heterocyclic compounds	杂环化合物	Heterocyclic compounds	杂环化合物	129	128.033	[M+H]+	C3H4N4O2	2	346727	312307	134214	219694	152709	307473	117732	173728	148678	271116	346380	126360	C08734	-	12584	645-93-2	-	-
MEDP2349	Ammeline	三聚氰酸二酰胺	Heterocyclic compounds	杂环化合物	Heterocyclic compounds	杂环化合物	128.1	127.049	[M+H]+	C3H5N5O	2	376314	383319	293742	423470	316828	277523	333631	325788	515386	373749	373668	325743	C08733	-	135408770	645-92-1	-	-
MEDP2059	Androstenediol	雄烯二醇	Hormones and hormone related compounds	激素及激素相关物质	Hormones and hormone related compounds	激素及激素相关物质	291.2	290.225	[M+H]+	C19H30O2	2	2.14986e+06	2.23311e+06	2.01963e+06	2.23223e+06	2.42907e+06	2.00176e+06	2.11262e+06	2.30087e+06	2.06523e+06	1.81569e+06	1.9643e+06	1.97637e+06	C04295	HMDB0003818	10634	521-17-5	2710	6983
MEDP1644	Aniline	苯胺	Alcohol and amines	醇、胺类	Amines	胺类	94.1	93.0578	[M+H]+	C6H7N	1	77803	85090.7	87936.4	52914.3	85610	57696.8	82739.6	80716.8	85594.3	57188.5	56465.9	68989.9	C00292	HMDB0003012	6115	62-53-3	17296	489
MEDP1480	Anserine	鹅肌肽	Amino acid and Its metabolites	氨基酸及其代谢物	Small Peptide	小肽	241	240.122	[M+H]+	C10H16N4O3	1	18668.5	8733.16	15371.4	18466	7169.13	12538.4	10737.3	13097.6	4754.65	17333	19423.6	14892.9	C01262	HMDB0000194	112072	584-85-0	18323	5209
MEDP0390	Arainosine	阿糖肌苷	Nucleotide And Its metabolites	核苷酸及其代谢物	Nucleotide And Its metabolites	核苷酸及其代谢物	269.1	268.081	[M+H]+	C10H12N4O5	1	1.26803e+06	1.32584e+06	2.26947e+06	2.74076e+06	1.41397e+06	2.49857e+06	2.98093e+06	2.69219e+06	1.46057e+06	1.8273e+06	2.0589e+06	1.86776e+06	-	HMDB0247301	135410268	7013-16-3	-	-
MEDN2140	Arg-Asp	L-精氨酸-L-天冬氨酸	Amino acid and Its metabolites	氨基酸及其代谢物	Small Peptide	小肽	288.1	289.139	[M-H]-	C10H19N5O5	2	43451.2	32823.4	38045	39931.9	42027.9	39154.1	25954.7	50943.3	49356.6	39170.5	47189.9	43015.6	-	HMDB0028705	7009612	15706-88-4	73812	-
MEDP2558*139	Arg-Gly	L-精氨酸-L-甘氨酸	Amino acid and Its metabolites	氨基酸及其代谢物	Small Peptide	小肽	232.1	231.133	[M+H]+	C8H17N5O3	2	59069.2	56032.3	58334.7	46656.1	56624.3	51022.5	68520.7	53899.6	70208.7	50225.3	60845.8	65552.6	-	HMDB0028709	142765	108347-93-9	-	-
MEDP2363	Arg-Ile	L-精氨酸-L-异亮氨酸	Amino acid and Its metabolites	氨基酸及其代谢物	Small Peptide	小肽	288.2	287.196	[M+H]+	C12H25N5O3	2	89924.9	78862.5	129862	125247	90716.9	123937	158062	172432	115862	80506.1	116128	111353	-	-	7009553	62632-70-6	-	-
MEDP1850	Arg-Leu	精氨酸-亮氨酸	Amino acid and Its metabolites	氨基酸及其代谢物	Small Peptide	小肽	288.2	287.196	[M+H]+	C12H25N5O3	2	113288	149310	147386	183672	158660	169356	302675	208005	146704	227064	140474	212502	-	HMDB0028713	6992563	1188-24-5	73815	-
MEDN2271	Arg-Phe-Val-Asp	Arg-Phe-Val-Asp	Amino acid and Its metabolites	氨基酸及其代谢物	Small Peptide	小肽	534.3	535.275	[M-H]-	C24H37N7O7	2	94492.4	83372.3	77636.3	100499	96861.1	82595.5	91667.7	100884	86096.9	72750.5	76583.2	70119.9	-	-	18246058	-	-	-
MEDP2492	Arg-Ser	L-精氨酸-L-丝氨酸	Amino acid and Its metabolites	氨基酸及其代谢物	Small Peptide	小肽	262.1	261.144	[M+H]+	C9H19N5O4	2	47115	46514	10033.5	35852.8	26387.5	29170.7	41481.4	32352.1	38004.6	45290.3	45933	45478.4	-	-	7021454	-	-	-
MEDP2497	Arg-Thr	L-精氨酸-L-苏氨酸	Amino acid and Its metabolites	氨基酸及其代谢物	Small Peptide	小肽	276.2	275.159	[M+H]+	C10H21N5O4	2	51351.5	33158.6	29326.6	11670	32766.1	31637.5	41666.1	43688.3	37069.5	32144.7	31571.9	41960.6	-	-	9943463	-	-	-
MEDN0499	Argininosuccinic acid	精氨基琥珀酸	Organic acid And Its derivatives	有机酸及其衍生物	Organic acid And Its derivatives	有机酸及其衍生物	289.1	290.123	[M-H]-	C10H18N4O6	2	52780.2	37713.3	58251.2	46171	38871.7	45023.8	62336.4	40835.3	44968.8	43882.8	32795.3	53099.8	C03406	HMDB0000052	16950	2387-71-5	15682	5115
MEDP2568	Asn-Hyp	L-天冬酰胺-L-羟脯氨酸	Amino acid and Its metabolites	氨基酸及其代谢物	Small Peptide	小肽	246.1	245.101	[M+H]+	C9H15N3O5	2	31896.5	30003.7	35150.2	42292.3	45791.5	34153.2	21605.3	20281.2	17974.9	34659.6	33699.2	19404	-	-	-	-	-	-
MEDP2505	Asn-Met	L-天冬酰胺-L-蛋氨酸	Amino acid and Its metabolites	氨基酸及其代谢物	Small Peptide	小肽	264.1	263.094	[M+H]+	C9H17N3O4S	2	173722	192499	161671	157704	169584	196534	147822	183335	190183	182613	156110	127561	-	-	9813901	-	-	-
MEDP2328	Asn-Trp	天冬酰胺-色氨酸	Amino acid and Its metabolites	氨基酸及其代谢物	Small Peptide	小肽	319.1	318.132	[M+H]+	C15H18N4O4	2	3237.3	5243.82	3904.16	2194.56	7067.43	11351.5	9513.41	8805.8	6750.48	15907.6	9483.69	9441.3	-	-	18218187	-	-	-
MEDP2579*152	Asp-Lys	L-天冬氨酸-L-赖氨酸	Amino acid and Its metabolites	氨基酸及其代谢物	Small Peptide	小肽	262.1	261.132	[M+H]+	C10H19N3O5	2	35426.2	17083	27896.8	30082.7	16189.2	36746.3	37574.2	5541.03	8370.12	28318.6	20163.7	28919.6	-	HMDB0004987	6427003	5891-51-0	73829	-
MEDP0037	Asp-Phe	天冬氨酸-苯丙氨酸	Amino acid and Its metabolites	氨基酸及其代谢物	Small Peptide	小肽	281.3	280.106	[M+H]+	C13H16N2O5	2	23894.3	22961.7	60089.8	60823.7	28817.6	54485.7	80690.4	88736.5	33582.7	50773	49218.6	55633.7	-	HMDB0000706	93078	13433-09-5	73830	5674
MEDP1744	Astaxanthin	虾青素	Others	其他	Others	其他	597	596.387	[M+H]+	C40H52O4	2	1.05837e+08	1.0903e+08	1.10782e+08	1.03323e+08	1.10351e+08	1.07784e+08	1.06941e+08	1.13407e+08	1.11692e+08	108352595	1.13209e+08	1.07852e+08	C08580	HMDB0002204	5281224	472-61-7	40968	3671
MEDP1359	Asterina-330	Asterina-330	Amino acid and Its metabolites	氨基酸及其代谢物	Amino acid derivatives	氨基酸衍生物	289.1	288.132	[M+H]+	C12H20N2O6	2	78520.3	71123.2	60651.1	83076.8	80139.9	65840.9	49580.7	92889.9	107710	73401.2	103995	108275	-	-	13194807	-	-	-
MEDP0301	Azelaic Acid	壬二酸	Organic acid And Its derivatives	有机酸及其衍生物	Organic acid And Its derivatives	有机酸及其衍生物	189.1	188.105	[M+H]+	C9H16O4	2	56129.7	56070.4	56509.5	54994.7	71127.9	59705.5	58165	89578.1	64884.8	56002.1	60376.6	59704.5	C08261	HMDB0000784	2266	123-99-9	48131	5750
MEDP2753	Azelaoyl PAF	壬二酰PAF	FA	脂肪酰类	Others	其他	652.4	651.448	[M+H]+	C33H66NO9P	2	461782	420827	482398	568713	370779	344367	372171	468118	446092	222120	219770	216818	-	-	17757205	354583-69-0	-	-
MEDP2249	BAY-41-8543	BAY-41-8543	Benzene and substituted derivatives	苯及其衍生物	Benzene and substituted derivatives	苯及其衍生物	421.2	420.182	[M+H]+	C21H21FN8O	2	244064	205581	224829	209590	215896	213360	230988	256323	204987	160100	175303	200613	-	-	9953906	256498-66-5	-	-
MEDN1649	Barbital	巴比妥	Heterocyclic compounds	杂环化合物	Heterocyclic compounds	杂环化合物	183.1	184.085	[M-H]-	C8H12N2O3	1	1.11624e+07	1.13228e+07	1.15384e+07	1.1696e+07	1.12804e+07	1.083e+07	1.12901e+07	1.11481e+07	1.07867e+07	9.78186e+06	9.8346e+06	1.03086e+07	D01740	HMDB0062202	2294	57-44-3	-	-
MEDP0729	Barbituric acid	巴比妥酸	Heterocyclic compounds	杂环化合物	Heterocyclic compounds	杂环化合物	129	128.022	[M+H]+	C4H4N2O3	1	2.38408e+06	2.6559e+06	3.17573e+06	1.6993e+06	2.23292e+06	1.94457e+06	2.93757e+06	2.30869e+06	2.08504e+06	2.40424e+06	1.44124e+06	1.72196e+06	C00813	HMDB0041833	6211	67-52-7	16294	-
MEDP1033	Benzaldehyde	苯甲醛	Benzene and substituted derivatives	苯及其衍生物	Benzene and substituted derivatives	苯及其衍生物	107	106.042	[M+H]+	C7H6O	1	4.39096e+06	4.09098e+06	4.20375e+06	4.65797e+06	5.04439e+06	4.38019e+06	4.18429e+06	4.67139e+06	4.90837e+06	3.90874e+06	4.21039e+06	4.17891e+06	C00261	HMDB0006115	240	100-52-7	17169	-
MEDN0084	Benzoic Acid	苯甲酸	Benzene and substituted derivatives	苯及其衍生物	Benzene and substituted derivatives	苯及其衍生物	121	122.037	[M-H]-	C7H6O2	2	5.18783e+06	5.95951e+06	4.22571e+06	3.39475e+06	4.97203e+06	4.11993e+06	5.70378e+06	4.16713e+06	4.89822e+06	2.93072e+06	3.08094e+06	2.93224e+06	C00180	HMDB0001870	243	65-85-0	30746	1297
MEDP1822	Bergaptol	贝加普托醇	Benzene and substituted derivatives	苯及其衍生物	Benzene and substituted derivatives	苯及其衍生物	203	202.027	[M+H]+	C11H6O4	1	792966	892897	827353	816858	849071	706644	705495	893458	899708	659288	697153	725781	C00758	HMDB0013679	5280371	486-60-2	17377	-
MEDP1818	Bicine	N,N-二羟乙基甘氨酸	Organic acid And Its derivatives	有机酸及其衍生物	Organic acid And Its derivatives	有机酸及其衍生物	164.1	163.084	[M+H]+	C6H13NO4	2	115625	69928.8	132974	56721.5	48718.1	33371.9	57299.2	23782.9	11183	34779	52445.2	55285.6	-	HMDB0011727	8761	150-25-4	39066	-
MEDP1171	Butenoyl-PAF	丁烯酰基PAF	Others	其他	Others	其他	550.4	549.379	[M+H]+	C28H56NO7P	1	193677	216324	208623	185478	204370	176318	157581	168182	157842	173283	138017	135932	-	-	45138381	-	-	-
MEDP1853	CAP-palmitate	棕榈酸氯霉素	Organic acid And Its derivatives	有机酸及其衍生物	Organic acid And Its derivatives	有机酸及其衍生物	543.2	560.242	[M-H2O+H]+	C27H42Cl2N2O6	2	4.26513e+07	4.2396e+07	4.52928e+07	4.94917e+07	5.3289e+07	4.89543e+07	3.97983e+07	4.21109e+07	4.15685e+07	3.50105e+07	3.93388e+07	3.59051e+07	C11726	-	443382	530-43-8	-	-
MEDP1900	Caffeine	咖啡因	Heterocyclic compounds	杂环化合物	Heterocyclic compounds	杂环化合物	195.1	194.08	[M+H]+	C8H10N4O2	2	29321.9	6309.5	23824.9	23929.8	15061.8	25177.9	25241.9	16422.2	17890.5	81424.5	84247.8	100221	C07481	HMDB0001847	2519	1958/8/2	27732	1455
MEDP1646	Caldine	3,3'-二氨基二丙胺	Alcohol and amines	醇、胺类	Amines	胺类	132.2	131.142	[M+H]+	C6H17N3	2	68258.1	58965	70888.9	64907.4	52068.6	69906.2	59311.8	83344.8	52407.2	50577	31034.5	82674.9	C03375	-	5942	56-18-8	-	-
MEDP1387	Carnitine C19:2	肉碱 C19:2	FA	脂肪酰类	CAR	酰基肉碱	438.4	437.351	[M+H]+	C26H47NO4	2	2.0664e+06	1.69766e+06	2.76875e+06	1.7673e+06	1.06448e+06	2.46824e+06	1.71786e+06	1.42055e+06	2.65391e+06	2.86369e+06	2.6398e+06	2.74702e+06	-	-	-	-	-	-
MEDP2823	Carnitine C22:1	肉碱 C22:1	FA	脂肪酰类	CAR	酰基肉碱	482.4	481.413	[M+H]+	C29H55NO4	2	14406.5	61874.8	16632.2	26425.9	24340.4	25609.1	22213.8	20752	55009	13219.4	17035.3	15580.8	C02301	-	-	-	-	-
MEDP1373	Carnitine C22:2	肉碱 C22:2	FA	脂肪酰类	CAR	酰基肉碱	480.4	479.397	[M+H]+	C29H53NO4	1	18248.2	19626	24044.5	25649.3	22956.8	27268.2	26640.8	27675	26529.5	21794.3	25523.3	18788.1	-	-	-	-	-	-
MEDP2871	Carnitine C24:5	肉碱 C24:5	FA	脂肪酰类	CAR	酰基肉碱	502.4	501.382	[M+H]+	C31H51NO4	2	46797.4	40813.8	42631.4	48330.3	40448.7	38494.6	27295.4	37982.4	35596	35516.7	35564	26013.9	C02301	-	-	-	-	-
MEDP2872	Carnitine C24:6	肉碱 C24:6	FA	脂肪酰类	CAR	酰基肉碱	500.4	499.366	[M+H]+	C31H49NO4	2	100043	101798	97712.3	122579	122015	112833	78484.7	83201.6	91598.6	78528.7	72616.1	81614.9	C02301	-	-	-	-	-
MEDP2864	Carnitine C26:1	肉碱 C26:1	FA	脂肪酰类	CAR	酰基肉碱	538.5	537.476	[M+H]+	C33H63NO4	2	32954.3	76752.7	33663.9	34733.2	37317.4	34286.3	33042.6	33905	57524.8	32354.4	29271.8	32999.1	C02301	-	-	-	-	-
MEDP0510	Carnitine C2:0	乙酰肉碱	FA	脂肪酰类	CAR	酰基肉碱	204.1	203.116	[M+H]+	C9H17NO4	1	322028	182932	331333	430767	366491	319088	320005	428385	258773	298517	272100	245787	C02571	HMDB0000201	1	14992-62-2	57589	-
MEDP1665	Carnitine C3:0	丙酰肉碱	FA	脂肪酰类	CAR	酰基肉碱	218.1	217.131	[M+H]+	C10H19NO4	1	42500.4	41980.6	49736.4	59444.9	71247.5	65637.6	69132.7	54929.7	48959.5	41864.4	54735.4	42868.6	C03017	HMDB0000824	107738	17298-37-2	28867	5787
MEDP1442*140	Carnitine C4:0	肉碱 C4:0	FA	脂肪酰类	CAR	酰基肉碱	232.2	231.147	[M+H]+	C11H21NO4	1	20364.6	20507.2	34948	28057.3	28080.7	34875.6	27858.1	37542.4	43977	20887.5	29926.6	21632.8	-	HMDB0002013	-	-	21949	6436
MEDP1434	Carnitine C4:DC	肉碱 C4:DC	FA	脂肪酰类	CAR	酰基肉碱	262.1	261.121	[M+H]+	C11H19NO6	2	48173.4	34129.9	38222.5	27632.3	89201.8	84470.9	21281.3	60880.3	37373.4	48106.3	31762.6	45202.5	-	-	-	-	-	-
MEDP1440*146	Carnitine C5:0	肉碱-C5:0	FA	脂肪酰类	CAR	酰基肉碱	246.2	245.163	[M+H]+	C12H23NO4	1	61598.2	58886.4	71532.6	85392.7	77861.2	77046.1	78108.8	100951	81914.2	71891.8	67448.3	71515.4	-	-	-	-	-	-
MEDP0577*140	Carnitine isoC4:0	异丁酰肉碱	FA	脂肪酰类	CAR	酰基肉碱	232.1	231.147	[M+H]+	C11H21NO4	1	20364.6	20507.2	34948	28057.3	28080.7	34875.6	27858.1	37542.4	43977	20887.5	29926.6	21632.8	-	HMDB0000736	10177002	25518-49-4	84838	5704
MEDP0618*146	Carnitine-2-methyl-C4	2-甲基丁酰肉碱	FA	脂肪酰类	CAR	酰基肉碱	246.2	245.163	[M+H]+	C12H23NO4	1	61598.2	58886.4	71532.6	85392.7	77861.2	77046.1	78108.8	100951	81914.2	71891.8	67448.3	71515.4	-	HMDB0000378	6426901	31023-25-3	73026	5367
MEDP0428	Cholesterol	胆固醇	Hormones and hormone related compounds	激素及激素相关物质	Hormones and hormone related compounds	激素及激素相关物质	387.1	386.355	[M+H]+	C27H46O	2	793481	752508	830682	651818	788115	815261	743276	739624	837647	1.32653e+06	1.52339e+06	1.4151e+06	C00187	HMDB0000067	11025495	57-88-5	16113	-
MEDP0125	Choline	胆碱	Tryptamines,Cholines,Pigments	色胺、胆碱、色素	Cholines	胆碱类	104.1	104.108	[M]+	C5H14NO+	1	3.16111e+06	7.92322e+06	1.87239e+06	1.22179e+07	2.58098e+07	9.76154e+06	4.01122e+06	1.35794e+07	5.05609e+06	9.67768e+06	6.58883e+06	6.44028e+06	C00114	HMDB0000097	305	62-49-7	15354	56
MEDP1288	Chrysophanol	Chrysophanol	Benzene and substituted derivatives	苯及其衍生物	Benzene and substituted derivatives	苯及其衍生物	255.1	254.058	[M+H]+	C15H10O4	2	118703	108118	120400	116463	111766	101749	105444	123514	129205	98992.1	84265.2	92972.1	C10315	HMDB0030670	10208	481-74-3	3687	-
MEDN0206*017	Citramalic Acid	柠苹酸	Organic acid And Its derivatives	有机酸及其衍生物	Organic acid And Its derivatives	有机酸及其衍生物	147	148.1	[M-H]-	C5H8O5	2	90345.8	88818.3	92331.1	63121.9	85368.6	95158.5	93463.7	57340.3	106200	84372.1	89544.4	91235.6	C00815	HMDB0000426	1081	597-44-4	15584	5415
MEDN0198*036	Citric Acid	柠檬酸	Organic acid And Its derivatives	有机酸及其衍生物	Organic acid And Its derivatives	有机酸及其衍生物	191	192.027	[M-H]-	C6H8O7	1	100065	124161	132517	284619	343957	286458	169249	186877	161354	122300	170266	143948	C00158	HMDB0000094	311	77-92-9	30769	124
MEDP2756	Cocamidopropyl betaine	椰油酰胺甜菜碱	FA	脂肪酰类	Others	其他	343.3	342.288	[M+H]+	C19H38N2O3	2	2.84912e+06	2.83092e+06	1.85419e+06	1.75139e+06	2.07632e+06	2.21683e+06	2.40101e+06	2.02625e+06	2.36935e+06	2.12249e+06	2.0182e+06	2.07225e+06	-	-	20280	61789-40-0	-	-
MEDP1010	Coenzyme-II (β-NADP)	辅酶 II(β-NADP)	CoEnzyme and vitamins	辅酶和维生素	CoEnzyme and vitamins	辅酶和维生素	744	743.075	[M+H]+	C21H28N7O17P3	2	48925.4	19807.3	34950.5	51874.9	39610	16314.7	52417.4	31345.9	24343.4	27961.3	42179.8	40380.9	C00006	HMDB0000217	5885	53-59-8	18009	5227
MEDP1237	Coniferol	松柏醇	Alcohol and amines	醇、胺类	Alcohols	醇类	181.1	180.079	[M+H]+	C10H12O3	2	279741	350768	332768	327437	350007	290145	292018	317455	326454	341280	318281	318193	C00590	HMDB0012915	1549095	458-35-5	17745	-
MEDP2223	Cork-oximate	软木肟酸	Organic acid And Its derivatives	有机酸及其衍生物	Organic acid And Its derivatives	有机酸及其衍生物	205.1	204.111	[M+H]+	C8H16N2O4	2	520977	509841	558265	554879	627415	487186	613180	622921	540790	546290	560300	598451	D95566	-	5173	38937-66-5	-	-
MEDP1006	Creatine	肌酸	Organic acid And Its derivatives	有机酸及其衍生物	Organic acid And Its derivatives	有机酸及其衍生物	132.1	131.07	[M+H]+	C4H9N3O2	1	2.696e+06	2.28858e+06	2.07414e+06	2.8675e+06	2.75406e+06	3.10969e+06	3.29516e+06	2.0457e+06	2.29489e+06	2.89635e+06	3.07592e+06	3.06207e+06	C00300	HMDB0000064	586	57-00-1	16919	7
MEDP1161	Creatine phosphate	磷酸肌酸钠	Nucleotide And Its metabolites	核苷酸及其代谢物	Nucleotide And Its metabolites	核苷酸及其代谢物	212	211.036	[M+H]+	C4H10N3O5P	2	36045.5	38709.4	33406.9	37704.4	29747.3	25759.1	29292.6	26327.2	17464.4	33651	25928	35718.2	C02305	HMDB0001511	587	1967/7/2	17287	6288
MEDP0745	Creosol	2-甲氧基-4-甲基苯酚	Benzene and substituted derivatives	苯及其衍生物	Phenolics	苯酚类	139.2	138.068	[M+H]+	C8H10O2	2	476908	374124	427493	401003	466659	369836	430364	501525	422385	401080	375432	390410	D70655	HMDB0032136	7144	93-51-6	-	-
MEDN1236	Cyclic ADP ribose	环状ADP核糖	Nucleotide And Its metabolites	核苷酸及其代谢物	Nucleotide And Its metabolites	核苷酸及其代谢物	540.1	541.061	[M-H]-	C15H21N5O13P2	2	20598.6	24553.1	22707.9	23340.8	29815.7	25749.6	25424	27475.5	17268.7	19508.6	15261.5	13728.1	C13050	-	583439	119340-53-3	-	-
MEDP1923	Cyclo(Phe-Glu)	环(苯丙氨酸-谷氨酸)	Amino acid and Its metabolites	氨基酸及其代谢物	Small Peptide	小肽	277.1	276.111	[M+H]+	C14H16N2O4	2	25118	20395	30000.3	25071.7	28284	21079.5	22415.3	20327.7	18746.5	24101.6	28221.4	33901.7	-	-	-	-	-	-
MEDP2326	Cyclocreatine	环肌酸	Nucleotide And Its metabolites	核苷酸及其代谢物	Nucleotide And Its metabolites	核苷酸及其代谢物	144.1	143.069	[M+H]+	C5H9N3O2	2	4.52299e+06	4.29764e+06	4.38133e+06	2.13215e+06	4.1062e+06	4.09279e+06	3.59609e+06	4.07046e+06	3.79131e+06	4.33443e+06	3.83272e+06	3.88466e+06	-	-	2896	35404-50-3	-	-
MEDP1933*117	Cyclopentylglycine	环戊基甘氨酸	Amino acid and Its metabolites	氨基酸及其代谢物	Amino acid derivatives	氨基酸衍生物	144.1	143.095	[M+H]+	C7H13NO2	2	229418	251510	196689	263214	254099	194209	247827	228697	240419	266399	200241	207986	-	-	314101	2521-84-8	-	-
MEDP1748	Cyromazine	环丙氨嗪	Heterocyclic compounds	杂环化合物	Heterocyclic compounds	杂环化合物	167.1	166.097	[M+H]+	C6H10N6	1	24888	11242.3	25296.1	64901.3	11956.9	26515.6	31409.6	22759.1	12421.4	19916.8	19119.9	21559.8	C14147	HMDB0029862	47866	66215-27-8	30260	-
MEDN1910	Cys-Pro	L-半胱氨酸-L-脯氨酸	Amino acid and Its metabolites	氨基酸及其代谢物	Small Peptide	小肽	217.1	218.073	[M-H]-	C8H14N2O3S	2	1.87887e+06	1.53438e+06	1.47412e+06	1.60429e+06	1.68735e+06	1.51861e+06	1.42392e+06	1.89633e+06	1.82076e+06	1.72542e+06	1.74394e+06	1.67135e+06	-	-	3037777	-	-	-
MEDP1295	Cytarabine	阿糖胞苷	Nucleotide And Its metabolites	核苷酸及其代谢物	Nucleotide And Its metabolites	核苷酸及其代谢物	244.1	243.086	[M+H]+	C9H13N3O5	1	28808.4	53253.1	98753.2	125978	175930	181043	154101	153538	83227.8	122256	132996	111006	C02961	HMDB0015122	6253	147-94-4	28680	-
MEDP0163	Cytidine	胞苷	Nucleotide And Its metabolites	核苷酸及其代谢物	Nucleotide And Its metabolites	核苷酸及其代谢物	244.1	243.086	[M+H]+	C9H13N3O5	1	5394.73	9143.21	10369.8	42380.9	20370.1	45224.2	19200.8	35566.2	60881	20091.2	25402.2	16959.9	C00475	HMDB0000089	6175	65-46-3	17562	3376
MEDP1749	Cytidine 5'-diphosphate	胞苷5'-二磷酸	Nucleotide And Its metabolites	核苷酸及其代谢物	Nucleotide And Its metabolites	核苷酸及其代谢物	427	403.018	[M+Na]+	C9H15N3O11P2	2	163051	87711.8	91895.2	106244	87405.2	93130.7	113377	234769	112182	96615.8	102046	81632	C00112	-	6132	63-38-7	-	-
MEDP0164	Cytidine-5-Monophosphate	胞苷-5-单磷酸	Nucleotide And Its metabolites	核苷酸及其代谢物	Nucleotide And Its metabolites	核苷酸及其代谢物	324	323.052	[M+H]+	C9H14N3O8P	2	78697.8	113720	271260	362293	141730	313370	430256	387760	58574.4	213607	277470	215723	C00055	HMDB0000095	6131	63-37-6	17361	5143
MEDN1612	Cytidine 2',3'-cyclic monophosphoric acid	胞苷2'，3'-环一磷酸	Nucleotide And Its metabolites	核苷酸及其代谢物	Nucleotide And Its metabolites	核苷酸及其代谢物	304	305.041	[M-H]-	C9H12N3O7P	2	51004.7	48156	89786.3	124196	92467.2	102006	126426	153382	59430.9	80841.3	96527	52686.6	C02354	HMDB0011691	91746159	633-90-9	-	-
MEDN1613	Cytochalasin H	细胞松弛素H	Hormones and hormone related compounds	激素及激素相关物质	Hormones and hormone related compounds	激素及激素相关物质	474.3	493.283	[M-H2O-H]-	C30H39NO5	2	1.33802e+06	2.54906e+06	2.78396e+06	1.63509e+06	1.71979e+06	1.53887e+06	1.14723e+06	1.12418e+06	1.97899e+06	1.23615e+06	1.58302e+06	1.88356e+06	-	-	6434468	53760-19-3	-	-
MEDP1011*162	D-(+)-sucrose	D-(+)-蔗糖	Carbohydrates and Its metabolites	碳水化合物及其代谢物	Sugars	糖类	325.1	342.116	[M-H2O+H]+	C12H22O11	1	773106	790669	466119	4.44339e+06	789338	1.21258e+06	868070	1.32681e+06	610667	1.34799e+06	801930	686867	C00089	HMDB0000258	5988	57-50-1	-	-
MEDP2529	D-Alloisoleucine	别异亮氨酸	Amino acid and Its metabolites	氨基酸及其代谢物	Amino acids	氨基酸	132.1	131.095	[M+H]+	C6H13NO2	1	4.7594e+06	4.77031e+06	6.71409e+06	6.32917e+06	3.29757e+06	4.97222e+06	8.81144e+06	9.72487e+06	5.73371e+06	3.65504e+06	3.54405e+06	3.89658e+06	C21092	-	94206	1509-35-9	-	-
MEDN0228*020	D-Arabinose	D-阿拉伯糖	Carbohydrates and Its metabolites	碳水化合物及其代谢物	Sugars	糖类	149	150.053	[M-H]-	C5H10O5	2	193829	162906	133562	168315	115177	133737	105852	177174	169468	170390	232782	158670	-	HMDB0029942	66308	147-81-9	46983	-
MEDN0211*020	D-Arabitol	阿拉伯糖醇	Carbohydrates and Its metabolites	碳水化合物及其代谢物	Sugar alcohols	糖醇	151.1	152.069	[M-H]-	C5H12O5	2	193829	162906	133562	168315	115177	133737	105852	177174	169468	170390	232782	158670	C01904	HMDB0000568	827	488-82-4	18333	5551
MEDN0226	D-Erythronolactone	(3R,4R)-D-赤酮酸内酯	Aldehyde,Ketones,Esters	醛、酮、酯类	Esters	酯类	117	118.027	[M-H]-	C4H6O4	1	2.72268e+06	2.24706e+06	1.99733e+06	2.39596e+06	2.34836e+06	2.20208e+06	2.86502e+06	2.51085e+06	2.11055e+06	2.34235e+06	1.90666e+06	2.7544e+06	-	HMDB0000349	5325915	15667-21-7	87625	5338
MEDP0224*128	D-Fructose	D-果糖	Carbohydrates and Its metabolites	碳水化合物及其代谢物	Sugars	糖类	181	180.063	[M+H]+	C6H12O6	1	8.52963e+06	7.71847e+06	8.59464e+06	8.78491e+06	7.1933e+06	7.89871e+06	8.88405e+06	7.14346e+06	1.02478e+07	9.46718e+06	8.99948e+06	1.01257e+07	C10906	HMDB0062538	5984	57-48-7	48095	-
MEDN1532	D-Galacturonic Acid	半乳糖醛酸	Carbohydrates and Its metabolites	碳水化合物及其代谢物	Sugar acids	糖酸	193	194.043	[M-H]-	C6H10O7	2	154922	155736	142229	116655	108735	154690	146695	161124	127014	162473	120217	121066	C00333	HMDB0002545	439215	685-73-4	47962	6713
MEDN0531*042	D-Glucarate	葡萄糖二酸	Carbohydrates and Its metabolites	碳水化合物及其代谢物	Sugar acids	糖酸	209	210.038	[M-H]-	C6H10O8	2	102640	118452	110339	87819.5	108293	123544	115482	85881.6	93588.4	240549	207785	229693	C00818	HMDB0029881	33037	87-73-0	16002	5633
MEDP0236	D-Gluconic Acid	葡萄糖酸	Carbohydrates and Its metabolites	碳水化合物及其代谢物	Sugar acids	糖酸	197.1	196.058	[M+H]+	C6H12O7	2	192014	281940	241667	215307	232980	205605	212432	264680	221667	204249	234397	226231	C00257	HMDB0000625	10690	526-95-4	33198	345
MEDP1761*126	D-Glucosamine	D-氨基葡萄糖	Carbohydrates and Its metabolites	碳水化合物及其代谢物	Sugar acids	糖酸	180.1	179.079	[M+H]+	C6H13NO5	2	17266	22507.8	22799.4	27484.6	29984.3	28806.1	28446	11122.7	20020.2	12022.8	13121	8536.55	C00329	HMDB0001514	439213	3416-24-8	47977	266
MEDN1011*036	D-Mannitol	D-甘露醇	Carbohydrates and Its metabolites	碳水化合物及其代谢物	Sugar alcohols	糖醇	181.1	182.079	[M-H]-	C6H14O6	2	100065	124161	132517	284619	343957	286458	169249	186877	161354	122300	170266	143948	C00392	HMDB0000765	6251	69-65-8	16899	142
MEDP0227*128	D-Mannose	D-甘露糖	Carbohydrates and Its metabolites	碳水化合物及其代谢物	Sugars	糖类	181	180.063	[M+H]+	C6H12O6	2	8.52963e+06	7.71847e+06	8.59464e+06	8.78491e+06	7.1933e+06	7.89871e+06	8.88405e+06	7.14346e+06	1.02478e+07	9.46718e+06	8.99948e+06	1.01257e+07	C00159	HMDB0000169	18950	3458-28-4	4208	-
MEDN0222*060	D-Melezitose	D-松三糖	Carbohydrates and Its metabolites	碳水化合物及其代谢物	Sugars	糖类	503.2	504.169	[M-H]-	C18H32O16	2	8307.28	1471.04	28849	40574.9	8091.78	10813.7	19400.7	23685.6	12704.4	13446.7	16182.3	16639.4	C08243	HMDB0011730	92817	597-12-6	6731	-
MEDN0461	D-Sedoheptuiose 7-Phosphate	D-景天庚酮糖 7-磷酸	Carbohydrates and Its metabolites	碳水化合物及其代谢物	Phosphate sugars	磷酸糖	289	290.04	[M-H]-	C7H15O10P	2	64739.2	46416	86635.7	103730	80248.7	72560.6	70993.1	62955.9	84103.6	73720.5	68133.6	67177.6	C05382	HMDB0001068	22833559	2646-35-7	15721	-
MEDN0213*036	D-Sorbitol	D-山梨糖醇	Carbohydrates and Its metabolites	碳水化合物及其代谢物	Sugar alcohols	糖醇	181.1	182.079	[M-H]-	C6H14O6	2	100065	124161	132517	284619	343957	286458	169249	186877	161354	122300	170266	143948	C00794	HMDB0000247	5780	50-70-4	-	-
MEDN0224*056	D-Trehalose	D-海藻糖	Carbohydrates and Its metabolites	碳水化合物及其代谢物	Sugars	糖类	341.1	342.116	[M-H]-	C12H22O11	2	7.94948e+06	8.8973e+06	12640618	1.747e+07	1.09103e+07	1.46579e+07	1.32386e+07	1.69903e+07	1.64388e+07	1.55069e+07	1.2023e+07	1.27607e+07	C01083	HMDB0000975	7427	99-20-7	16551	5913
MEDP1123*165	D-Turanose	D-松二糖	Others	其他	Others	其他	343.1	342.116	[M+H]+	C12H22O11	2	85773.2	76866.1	100068	92984.9	156621	69517.4	149911	109415	86057.6	91608.3	128108	133728	C19636	-	54301978	547-25-1	-	-
MEDN0225*020	D-Xylose	D-木糖	Carbohydrates and Its metabolites	碳水化合物及其代谢物	Sugars	糖类	149	150.053	[M-H]-	C5H10O5	2	193829	162906	133562	168315	115177	133737	105852	177174	169468	170390	232782	158670	C00181	HMDB0000098	135191	58-86-6	53455	314
MEDN1760	D-cellobiose	D-纤维二糖	Carbohydrates and Its metabolites	碳水化合物及其代谢物	Sugars	糖类	341.1	342.116	[M-H]-	C12H22O11	2	5.92396e+06	6.69572e+06	6.79638e+06	7.86732e+06	8.2723e+06	7.9562e+06	7.17551e+06	7.00956e+06	7.88958e+06	7.03386e+06	6.02433e+06	8.02349e+06	C06422	HMDB0000055	10712	528-50-7	36217	3480
MEDP0752*114	DL-Leucine	DL-亮氨酸	Amino acid and Its metabolites	氨基酸及其代谢物	Amino acids	氨基酸	132.1	131.095	[M+H]+	C6H13NO2	1	3.40163e+06	3.2858e+06	6.1759e+06	5.17777e+06	3.00709e+06	4.02389e+06	6.88063e+06	6.50506e+06	4.08695e+06	4.6788e+06	4.32607e+06	4.33828e+06	C00123	HMDB0062203	857	328-39-2	-	-
MEDN1763	DL-O-tyrosine	DL-邻酪氨酸	Amino acid and Its metabolites	氨基酸及其代谢物	Amino acid derivatives	氨基酸衍生物	180.1	181.074	[M-H]-	C9H11NO3	1	21521.8	32412.4	38820.1	28026.8	32077.9	26360.8	26001.1	32277.1	49226.1	20786.6	23503.7	30756.8	-	HMDB0006050	91482	2370-61-8	91038	-
MEDN2050	Daidzein	黄豆苷元	Benzene and substituted derivatives	苯及其衍生物	Benzene and substituted derivatives	苯及其衍生物	313.1	254.058	[M-H]-	C15H10O4	1	1.27926e+06	1.19259e+06	1.18722e+06	1.15392e+06	1.06085e+06	1.29151e+06	1.15036e+06	1.21858e+06	1.29691e+06	1.21506e+06	1.73031e+06	1.45389e+06	C10208	HMDB0003312	5281708	486-66-8	28197	-
MEDP2024	Dehydroascorbic acid	L-脱氢抗坏血酸	Organic acid And Its derivatives	有机酸及其衍生物	Organic acid And Its derivatives	有机酸及其衍生物	175	174.016	[M+H]+	C6H6O6	2	184640	166909	176723	200231	195930	155816	151762	174918	130343	144552	150156	147319	C05422	HMDB0001264	440667	490-83-5	17242	342
MEDN1899	Deoxycholic acid	脱氧胆酸	Bile acids	胆汁酸	Bile acids	胆汁酸	391.3	392.293	[M-H]-	C24H40O4	1	70011.9	87368.2	74310.3	48904	58599.1	52612.5	96980.2	88972.4	81253.3	73237.8	55742.4	76966.9	C04483	HMDB0000626	222528	302-95-4	28834	265
MEDP2409	Deoxyguanosine	2'-脱氧鸟苷	Nucleotide And Its metabolites	核苷酸及其代谢物	Nucleotide And Its metabolites	核苷酸及其代谢物	268.1	267.097	[M+H]+	C10H13N5O4	2	47102.6	32947.8	24165.5	57151.5	74330.1	68814.5	37858.4	36447.3	32116.2	32066.9	36183	48940	C00330	HMDB0000085	187790	961-07-9	17172	3395
MEDP0836	Dibutyl-phthalate	邻苯二甲酸二丁酯	Aldehyde,Ketones,Esters	醛、酮、酯类	Esters	酯类	279.3	278.152	[M+H]+	C16H22O4	2	1.02857e+08	1.09698e+08	1.35991e+08	1.22104e+08	1.18473e+08	1.37047e+08	1.19994e+08	1.34416e+08	131313982	112010725	1.45131e+08	1.47181e+08	C14214	HMDB0033244	3026	84-74-2	34687	-
MEDP2323	Diethyl-phosphate	磷酸二乙酯	Aldehyde,Ketones,Esters	醛、酮、酯类	Esters	酯类	155	154.039	[M+H]+	C4H11O4P	1	345592	364529	345960	287604	365157	328283	287759	343778	273262	304626	376364	284033	C06608	HMDB0012209	654	598-02-7	27708	-
MEDP1055	Dl-Glyceraldehyde 3-Phosphate	DL-甘油醛-3-磷酸	Organic acid And Its derivatives	有机酸及其衍生物	Phosphoric acids	磷酸类化合物	171	169.998	[M+H]+	C3H7O6P	2	812172	435435	618892	326919	534391	458162	424833	526870	422913	498776	512871	457734	C00661	HMDB0001112	729	591-59-3	17138	3294
MEDN0311	Dodecanedioic Acid	十二烷二酸	FA	脂肪酰类	FFA	游离脂肪酸	229.1	230.152	[M-H]-	C12H22O4	1	523193	577163	585449	573966	554405	584738	598042	507046	596983	564605	587904	539268	C02678	HMDB0000623	12736	693-23-2	4676	5596
MEDN0120*036	Dulcitol	己六醇	Carbohydrates and Its metabolites	碳水化合物及其代谢物	Sugar alcohols	糖醇	181.1	182.079	[M-H]-	C6H14O6	2	100065	124161	132517	284619	343957	286458	169249	186877	161354	122300	170266	143948	C01697	HMDB0000107	11850	608-66-2	16813	5148
MEDP2724	EDTA	乙二胺四乙酸	Organic acid And Its derivatives	有机酸及其衍生物	Organic acid And Its derivatives	有机酸及其衍生物	293.1	292.091	[M+H]+	C10H16N2O8	2	298186	258061	277604	727508	969314	141631	9	698036	832926	820116	625920	638622	-	-	6049	60-00-4	-	-
MEDP2375	Ectoine	(S)-2-甲基-3,4,5,6-四氢嘧啶-4-羧酸	Heterocyclic compounds	杂环化合物	Heterocyclic compounds	杂环化合物	143.1	142.074	[M+H]+	C6H10N2O2	2	163164	148229	160582	189290	156086	125512	178764	169421	162745	231889	171030	161285	C06231	-	126041	96702-03-3	-	-
MEDP1857	Eicosanoyl-EA	花生四烯酸乙醇酰胺	Organic acid And Its derivatives	有机酸及其衍生物	Organic acid And Its derivatives	有机酸及其衍生物	356.4	355.345	[M+H]+	C22H45NO2	2	1.12107e+06	1.10485e+06	720819	987800	1.21214e+06	826084	1.12402e+06	918381	966925	1.24193e+07	1.26262e+07	1.29044e+07	-	-	3787294	94421-69-9	-	-
MEDP2665	Ensulizole	2-苯基-5-苯并咪唑磺酸	Benzene and substituted derivatives	苯及其衍生物	Benzene and substituted derivatives	苯及其衍生物	275	274.041	[M+H]+	C13H10N2O3S	2	101512	40088.9	26018.3	54538.4	192407	72107.8	14475.9	61367.9	58501.3	72186.7	71305.8	61950.4	D10005	-	33919	27503-81-7	-	-
MEDP0437	Ergothioneine	麦角硫因	Organic acid And Its derivatives	有机酸及其衍生物	Organic acid And Its derivatives	有机酸及其衍生物	230.1	229.088	[M+H]+	C9H15N3O2S	2	79972.5	62792	80283	79274.9	54702	61512	113526	55029.1	82693.7	84707	84130.2	97020.6	C05570	HMDB0003045	5351619	497-30-3	4828	53
MEDN2295	Estradiol cypionate	环己酸雌二醇	Hormones and hormone related compounds	激素及激素相关物质	Hormones and hormone related compounds	激素及激素相关物质	395.2	396.266	[M-H]-	C26H36O3	2	108651	188808	162711	44402.4	151324	131986	113714	185423	158532	216018	135453	138726	-	-	9403	313-06-4	-	-
MEDN1484	Ethionamide	乙硫酰胺	Heterocyclic compounds	杂环化合物	Pteridines and derivatives	蝶啶及其衍生物	165	166.056	[M-H]-	C8H10N2S	2	2.02503e+07	1.94914e+07	1.93494e+07	2.13559e+07	2.26412e+07	1.96652e+07	2.14682e+07	2.53566e+07	2.22229e+07	1.96433e+07	2.19404e+07	2.23591e+07	C07665	HMDB0014747	2761171	536-33-4	4885	-
MEDP2033	Ethyl 3-Indoleacetate	3-吲哚乙酸乙酯	Heterocyclic compounds	杂环化合物	Indole and Its derivatives	吲哚及其衍生物	204.1	203.095	[M+H]+	C12H13NO2	2	66878.5	62704.6	92847	81805.4	81661.3	70765	78478.9	71530.5	84524.7	49419.6	95438.4	71685.5	-	-	13067	778-82-5	-	-
MEDP0658	Ethyl-dodecanoate	月桂酸乙酯	Alcohol and amines	醇、胺类	Amines	胺类	229.1	228.209	[M+H]+	C14H28O2	2	575108	567892	673856	586451	552526	605596	556145	559143	635126	680777	668423	664486	D70267	HMDB0033788	7800	106-33-2	-	-
MEDN0678	Ethylsalicylate	水杨酸乙酯	Organic acid And Its derivatives	有机酸及其衍生物	Organic acid And Its derivatives	有机酸及其衍生物	165.1	166.063	[M-H]-	C9H10O3	2	1.99419e+07	2.07877e+07	2.06698e+07	2.24088e+07	2.0634e+07	2.16256e+07	2.35378e+07	2.57217e+07	2.35254e+07	2.13475e+07	2.27952e+07	2.2945e+07	D70269	HMDB0029817	8365	118-61-6	-	-
MEDN2304	FAA(19:0)	FAA(19:0)	FA	脂肪酰类	FFA	游离脂肪酸	297.2	298.287	[M-H]-	C19H38O2	2	85320.2	78500.9	71296.8	81302.7	78678.5	82820.9	71816.5	83439.7	80533.4	87387	117131	101099	-	HMDB0000772	12591	646-30-0	39246	5738
MEDN0385	FFA(12:0)	月桂酸	FA	脂肪酰类	FFA	游离脂肪酸	199.2	200.17	[M-H]-	C12H24O2	2	5.84254e+06	4.47854e+06	4.2628e+06	6.60842e+06	4.3465e+06	4.42112e+06	5.50775e+06	4.02251e+06	4.75385e+06	4.45116e+06	4.89275e+06	4.73869e+06	C02679	HMDB0000638	3893	143-07-7	30805	5611
MEDN0807	FFA(14:0)	肉豆蔻酸	FA	脂肪酰类	FFA	游离脂肪酸	227.2	228.209	[M-H]-	C14H28O2	2	55827.7	54573	110737	110176	55418.7	54263.7	52607.5	99175.7	111347	102297	103149	115340	C06424	HMDB0000806	11005	544-63-8	28875	196
MEDN2357	FFA(14:1)	肉豆蔻酸	FA	脂肪酰类	FFA	游离脂肪酸	225.2	226.193	[M-H]-	C14H26O2	2	9.24625e+06	8.89633e+06	9.19277e+06	7.31224e+06	8.29037e+06	7.20154e+06	7.05795e+06	7.99224e+06	8.11466e+06	7.36303e+06	8.08341e+06	7.46625e+06	C08322	HMDB0002000	5281119	-	27781	6424
MEDN2354	FFA(15:0)	十五烷酸	FA	脂肪酰类	FFA	游离脂肪酸	241.2	242.225	[M-H]-	C15H30O2	2	2.07134e+07	2.03111e+07	2.32185e+07	1.9801e+07	2.09948e+07	1.71634e+07	1.62343e+07	2.013e+07	1.76021e+07	1.90846e+07	2.03981e+07	2.024e+07	C16537	HMDB0000826	13849	-	42504	5789
MEDN1159	FFA(15:1)	顺-1-十五烯酸	FA	脂肪酰类	FFA	游离脂肪酸	239.2	240.209	[M-H]-	C15H28O2	2	729359	771638	783685	745674	784283	748993	843678	791179	801386	678363	1.08752e+06	954266	-	-	5312411	84743-29-3	-	-
MEDN0381	FFA(16:0)	十六烷酸	FA	脂肪酰类	FFA	游离脂肪酸	255.2	256.24	[M-H]-	C16H32O2	1	2.09855e+08	2.03782e+08	2.02269e+08	2.15531e+08	2.13618e+08	2.01501e+08	2.12295e+08	2.15919e+08	2.14385e+08	2.62809e+08	2.60005e+08	2.6219e+08	C00249	HMDB0000220	985	1957/10/3	15756	187
MEDN1805	FFA(16:1)	棕榈油酸	FA	脂肪酰类	FFA	游离脂肪酸	253.2	254.225	[M-H]-	C16H30O2	1	5.43343e+07	5.2529e+07	6.11259e+07	6.88947e+07	7.12594e+07	6.38663e+07	5.51502e+07	5.99046e+07	6.56889e+07	5.77852e+07	5.91813e+07	5.47064e+07	C08362	HMDB0003229	445638	373-49-9	28716	188
MEDN1490	FFA(16:2)	十六碳二烯酸	FA	脂肪酰类	FFA	游离脂肪酸	251.2	252.209	[M-H]-	C16H28O2	1	2.46878e+06	2.4845e+06	2.49943e+06	2.79686e+06	2.95426e+06	2.65111e+06	2.55032e+06	2.59651e+06	2.80622e+06	2.45032e+06	2.67958e+06	2.87696e+06	-	HMDB0000477	13932172	28290-73-5	86147	5464
MEDN2417	FFA(16:4)	十六碳四烯酸	FA	脂肪酰类	FFA	游离脂肪酸	247.2	248.178	[M-H]-	C16H24O2	2	618445	605319	663720	718332	771994	691306	624861	687752	689699	606243	617177	664623	-	-	5312433	-	-	-
MEDN1089	FFA(17:1)	1-顺-十七碳烯酸(17:1n7)	FA	脂肪酰类	FFA	游离脂肪酸	267.2	268.24	[M-H]-	C17H32O2	2	4.57714e+07	4.26666e+07	4.51162e+07	4.05666e+07	4.42954e+07	4.1104e+07	3.51869e+07	3.85313e+07	3.90481e+07	3.84573e+07	3.7733e+07	4.05253e+07	-	-	5312435	29743-97-3	-	-
MEDN2414	FFA(17:2)	十七碳二烯酸	FA	脂肪酰类	FFA	游离脂肪酸	265.2	266.225	[M-H]-	C17H30O2	2	4.72932e+06	4.79878e+06	5.32551e+06	4.58981e+06	4.77833e+06	4.259e+06	3.86497e+06	4.43031e+06	4.3846e+06	4.29624e+06	4.36085e+06	4.54301e+06	-	-	5312622	-	-	-
MEDN0388	FFA(18:1)	油酸	FA	脂肪酰类	FFA	游离脂肪酸	281.2	282.25	[M-H]-	C18H34O2	1	311469	315144	327534	381592	383432	362946	334433	346235	360139	318372	318342	359892	C00712	HMDB0000207	445639	112-80-1	16196	190
MEDN0383	FFA(18:2)	亚油酸	FA	脂肪酰类	FFA	游离脂肪酸	279.2	280.24	[M-H]-	C18H32O2	2	7.30958e+07	6.73415e+07	7.21891e+07	7.50725e+07	6.8582e+07	5.84781e+07	5.69619e+07	6.26751e+07	6.69091e+07	5.96502e+07	6.38109e+07	6.58338e+07	C01595	HMDB0000673	5280450	60-33-3	17351	191
MEDN0378*054	FFA(18:3)	γ-亚麻酸(C18:3)	FA	脂肪酰类	FFA	游离脂肪酸	277.2	278.22	[M-H]-	C18H30O2	1	158776	170866	163249	203177	201343	188061	183094	186416	201186	182509	172886	187741	C06426	HMDB0003073	5280933	506-26-3	28661	386
MEDN1069	FFA(18:4)	6,9,12,15-十八碳四烯酸	FA	脂肪酰类	FFA	游离脂肪酸	275.2	276.209	[M-H]-	C18H28O2	1	126719	133707	145770	144971	159827	146891	131426	143672	156331	133691	126870	126646	C16300	-	5312508	20290-75-9	-	-
MEDN2415	FFA(19:2)	十九碳二烯酸	FA	脂肪酰类	FFA	游离脂肪酸	293.2	294.256	[M-H]-	C19H34O2	2	4.69514e+06	5.09728e+06	4.92881e+06	4.73843e+06	5.45539e+06	5.02129e+06	4.09376e+06	4.35091e+06	4.85624e+06	4.55104e+06	4.53481e+06	4.61214e+06	-	-	52921851	-	-	-
MEDN0394	FFA(20:2)	二十碳二烯酸	FA	脂肪酰类	FFA	游离脂肪酸	307.3	308.27	[M-H]-	C20H36O2	1	1.96427e+06	2.0374e+06	2.07212e+06	1.79897e+06	1.8611e+06	1.76811e+06	1.51273e+06	1.72627e+06	1.80397e+06	1.61106e+06	1.67072e+06	1.78665e+06	C16525	HMDB0005060	6439848	2091-39-6	73731	-
MEDN1156	FFA(20:4)	8,11-二十碳二烯酸	FA	脂肪酰类	FFA	游离脂肪酸	303.2	304.24	[M-H]-	C20H32O2	1	4.64184e+06	4.59378e+06	4.86532e+06	4.89954e+06	445597	4.43847e+06	262588	4.20776e+06	376798	341387	347790	390577	-	-	1899	82073-91-4	-	-
MEDN1608	FFA(22:4)	FFA(22:4)	FA	脂肪酰类	FFA	游离脂肪酸	331.3	332.272	[M-H]-	C22H36O2	2	857203	855395	898221	711788	776675	706533	601164	671977	706912	672386	700297	719551	C16527	HMDB0002226	5497181	28874-58-0	53487	6560
MEDN2361	FFA(22:5)	二十二碳五烯酸	FA	脂肪酰类	FFA	游离脂肪酸	329.2	330.256	[M-H]-	C22H34O2	2	252575	251637	254434	247133	247369	224534	209631	231256	241049	244011	244738	243317	-	-	5282850	2234-74-4	-	-
MEDP1918	Farnesylacetone	法尼司酮	Aldehyde,Ketones,Esters	醛、酮、酯类	Ketones	酮类	263	262.23	[M+H]+	C18H30O	2	173160	200991	255754	123172	176671	113683	67465.2	123110	199654	151538	174984	166944	-	-	1711945	-	-	-
MEDN1538	GalactinolHydrate	肌醇半乳糖苷二水合物	Carbohydrates and Its metabolites	碳水化合物及其代谢物	Sugar alcohols	糖醇	341.1	342.116	[M-H]-	C12H22O11	2	2.18997e+07	2.56483e+07	2.16278e+07	2.62092e+07	3.27554e+07	2.68646e+07	3.23729e+07	3.03765e+07	3.47921e+07	2.69839e+07	2.72214e+07	2.99445e+07	C01235	HMDB0005826	439451	3687-64-7	17505	-
MEDN0636	Ginkgoic acid	银杏酸	Organic acid And Its derivatives	有机酸及其衍生物	Organic acid And Its derivatives	有机酸及其衍生物	345.2	346.251	[M-H]-	C22H34O3	2	1.54464e+06	1.755e+06	1.21147e+06	4.48726e+06	4.9672e+06	1.67702e+06	2.6808e+06	4.14989e+06	4.35106e+06	2.13725e+06	2.78854e+06	2.34054e+06	C10794	HMDB0033897	5317600	22910-60-7	-	-
MEDP2542*133	Gln-Gly	L-谷氨酰胺-L-甘氨酸	Amino acid and Its metabolites	氨基酸及其代谢物	Small Peptide	小肽	204.1	203.09	[M+H]+	C7H13N3O4	2	167061	247489	150455	251031	156483	220150	276017	227366	196249	168137	181285	170561	-	HMDB0028797	6992691	2650-65-9	73848	-
MEDP2601	Glu-Arg	L-谷氨酸-L-精氨酸	Amino acid and Its metabolites	氨基酸及其代谢物	Small Peptide	小肽	304.2	303.154	[M+H]+	C11H21N5O5	2	13694.3	17084.6	13958.8	24762.5	10489.2	14395.1	13618.9	11998.9	10899.7	11323.2	9931.72	8473.43	-	HMDB0028813	9796450	7219-59-2	-	-
MEDP1653	Glu-Glu	L-谷氨酰-L-谷氨酸	Amino acid and Its metabolites	氨基酸及其代谢物	Small Peptide	小肽	277.1	276.096	[M+H]+	C10H16N2O7	2	160636	169121	170916	167948	175926	141060	205581	147496	130772	177371	170185	148353	C05282	HMDB0011737	92865	1116-22-9	73705	-
MEDP2325	Glu-His	谷氨酸-组氨酸	Amino acid and Its metabolites	氨基酸及其代谢物	Small Peptide	小肽	285.1	284.112	[M+H]+	C11H16N4O5	2	29992.9	11030.4	26978.6	9230.26	16762.3	15766.4	22371.3	22009.6	19791.5	16444.4	21161.1	11818.2	-	HMDB0028821	9921875	37460-15-4	-	-
MEDP2394*151	Glu-Ile	谷氨酸-异亮氨酸	Amino acid and Its metabolites	氨基酸及其代谢物	Small Peptide	小肽	261.1	260.137	[M+H]+	C11H20N2O5	2	93951.2	74178.7	162660	110507	98400.7	115689	151467	161763	124538	101628	121395	112116	-	HMDB0028822	9813855	5879-22-1	-	-
MEDP2597*158	Glu-Phe	L-谷氨酸-L-苯丙氨酸	Amino acid and Its metabolites	氨基酸及其代谢物	Small Peptide	小肽	295.1	294.121	[M+H]+	C14H18N2O5	2	190480	164123	385799	328286	240167	249323	334464	335911	215328	288276	251564	236386	-	HMDB0029156	18653118	20556-22-3	-	-
MEDP2348	Glu-Ser	谷氨酰-丝氨酸	Amino acid and Its metabolites	氨基酸及其代谢物	Small Peptide	小肽	235.1	234.08	[M+H]+	C8H14N2O6	2	20188.3	17769.7	19977.6	7341.52	13830.2	23764.5	27744.8	26760.3	33852.9	35423.1	19379.2	15375.9	-	HMDB0028828	6995653	5875-38-7	73509	-
MEDN1640	Glu-Tyr	谷氨酸-酪氨酸	Amino acid and Its metabolites	氨基酸及其代谢物	Small Peptide	小肽	309.1	310.116	[M-H]-	C14H18N2O6	1	50399.1	53271.2	53033.3	55036.5	51725.5	51305.6	50241.4	51473.3	52163.8	49769.8	52498.2	49126.5	-	HMDB0028831	515717	3422-39-7	73513	-
MEDP2559*139	Gly-Arg	L-甘氨酸-L-精氨酸	Amino acid and Its metabolites	氨基酸及其代谢物	Small Peptide	小肽	232.1	231.133	[M+H]+	C8H17N5O3	2	59069.2	56032.3	58334.7	46656.1	56624.3	51022.5	68520.7	53899.6	70208.7	50225.3	60845.8	65552.6	-	-	6426706	18635-55-7	-	-
MEDP2313*133	Gly-Gln	L-甘氨酸-L-谷氨酰胺	Amino acid and Its metabolites	氨基酸及其代谢物	Small Peptide	小肽	204.1	203.091	[M+H]+	C7H13N3O4	2	167061	247489	150455	251031	156483	220150	276017	227366	196249	168137	181285	170561	-	-	123913	13115-71-4	-	-
MEDP1670	Gly-Gly-Phe	甘氨酸-甘氨酸-苯丙氨酸	Amino acid and Its metabolites	氨基酸及其代谢物	Small Peptide	小肽	280.1	279.122	[M+H]+	C13H17N3O4	1	120128	131888	131819	101609	131623	125446	94667.1	104771	88303.2	120237	98115.5	96717.1	-	-	6993373	6234-26-0	-	-
MEDP1790	Gly-Ile	L-甘氨酸-L-异亮氨酸	Amino acid and Its metabolites	氨基酸及其代谢物	Small Peptide	小肽	189.1	188.116	[M+H]+	C8H16N2O3	2	95148.5	79772.4	136535	124845	66907.2	115645	151297	141538	91127.2	99383.5	86599.5	107054	-	HMDB0028844	88079	19461-38-2	-	-
MEDP0071	Gly-Leu	N-甘氨酰-L-亮氨酸	Amino acid and Its metabolites	氨基酸及其代谢物	Amino acid derivatives	氨基酸衍生物	189.1	188.116	[M+H]+	C8H16N2O3	2	79583	65020.4	124437	104094	74231	121983	167093	180822	112163	75511.7	92469.8	80742.7	C02155	HMDB0000759	92843	869-19-2	73514	5727
MEDP2312*134	Gly-Lys	甘氨酸-赖氨酸	Amino acid and Its metabolites	氨基酸及其代谢物	Small Peptide	小肽	204.1	203.126	[M+H]+	C8H17N3O3	2	203388	369944	227048	331807	259442	266115	266021	306981	233204	164516	194409	220569	-	-	3080576	997-62-6	-	-
MEDP0859	Gly-Phe	甘氨酰-苯丙氨酸	Amino acid and Its metabolites	氨基酸及其代谢物	Amino acid derivatives	氨基酸衍生物	223.2	222.1	[M+H]+	C11H14N2O3	1	210669	233191	524323	496181	253073	452027	746942	632778	290745	314941	328010	377432	-	HMDB0028848	92953	3321/3/7	-	-
MEDP2335	Gly-Thr	甘氨酸-苏氨酸	Amino acid and Its metabolites	氨基酸及其代谢物	Small Peptide	小肽	177.1	176.08	[M+H]+	C6H12N2O4	2	66440.1	43287.9	69446.4	50686.6	46930.7	63373.2	39499.8	50553.6	42370	51891.2	50105.7	58832	-	-	111257	7093-70-1	-	-
MEDP2508	Gly-Tyr	甘氨酸-酪氨酸	Amino acid and Its metabolites	氨基酸及其代谢物	Amino acid derivatives	氨基酸衍生物	239.1	238.095	[M+H]+	C11H14N2O4	2	174075	165155	366031	309762	252100	290483	412601	416410	199845	278248	231736	218355	-	HMDB0028853	92829	658-79-7	73517	-
MEDN0107	Glycolithocholic acid	甘氨石胆酸	Bile acids	胆汁酸	Bile acids	胆汁酸	432.3	433.319	[M-H]-	C26H43NO4	1	10028.6	10341.1	8077.74	9914.3	7563.73	11770.7	11308.2	8368.52	10442.9	7011.1	7255.74	10057.8	C15557	HMDB0000698	115245	474-74-8	37998	5666
MEDP1763	Guanidine	胍	Alcohol and amines	醇、胺类	Polyamines	多胺	60.1	59.0483	[M+H]+	CH5N3	2	1.29903e+06	1.35813e+06	1.33663e+06	1.20172e+06	1.55044e+06	1.43713e+06	1.51725e+06	1.47703e+06	1.57842e+06	1.29316e+06	1.30638e+06	1.3014e+06	C17349	HMDB0001842	3520	1950/1/1	42820	6342
MEDP0314	Guanidinoethyl Sulfonate	眯基牛磺酸	Organic acid And Its derivatives	有机酸及其衍生物	Sulfonic acids	磺酸类化合物	168	167.036	[M+H]+	C3H9N3O3S	1	205402	385360	226748	255819	263100	200108	195878	179974	198966	323325	284049	313477	C01959	HMDB0003584	68340	543-18-0	17228	6962
MEDP1276*121	Guanine	鸟嘌呤	Nucleotide And Its metabolites	核苷酸及其代谢物	Nucleotide And Its metabolites	核苷酸及其代谢物	152.1	151.049	[M+H]+	C5H5N5O	2	319724	329561	807701	862734	390927	759758	394369	718596	288689	322601	381129	366262	C00242	HMDB0000132	764	73-40-5	16235	315
MEDN0160	Guanosine	鸟苷	Nucleotide And Its metabolites	核苷酸及其代谢物	Nucleotide And Its metabolites	核苷酸及其代谢物	282.1	283.092	[M-H]-	C10H13N5O5	1	1.86956e+06	2.15259e+06	2.76701e+06	3.79153e+06	3.09228e+06	3.64068e+06	3.46196e+06	3.47817e+06	2.49909e+06	2.48572e+06	2.73273e+06	2.70422e+06	C00387	HMDB0000133	6802	118-00-3	16750	87
MEDN1545	Guanosine-5'-monophosphate	鸟苷5'-单磷酸	Nucleotide And Its metabolites	核苷酸及其代谢物	Nucleotide And Its metabolites	核苷酸及其代谢物	362	363.058	[M-H]-	C10H14N5O8P	1	33155.7	50579.8	114437	86252.5	62462.2	172337	99609.3	135775	53242.6	86187.6	75096.3	95909.2	C00144	HMDB0001397	135398631	85-32-5	17345	6216
MEDP2458	Heptethylene-glycol	庚乙二烯乙二醇	Alcohol and amines	醇、胺类	Alcohols	醇类	327.2	326.194	[M+H]+	C14H30O8	2	836672	1.05143e+06	805474	781929	789987	753635	958941	957121	984140	420239	466056	363206	-	HMDB0061835	79718	5617-32-3	44748	-
MEDP1228	Heterodendrin	2-吡喃葡萄糖氧基-3-甲基丁腈	Others	其他	Others	其他	262.1	261.121	[M+H]+	C11H19NO6	2	53890.9	33881.3	57195.8	42647.8	56552	34060.4	35956.6	58529.7	50000.5	40943.4	47728.3	38875.5	C08332	-	10530	66465-22-3	-	-
MEDP0513	Hexadecanamide	十六碳酰胺	Alcohol and amines	醇、胺类	Amines	胺类	256.3	255.256	[M+H]+	C16H33NO	2	860786	1.2174e+06	1.37837e+06	870124	1.10974e+06	1.00344e+06	777551	641402	1.31496e+06	842079	1.27478e+06	1.39839e+06	-	HMDB0012273	69421	629-54-9	74475	-
MEDN0658	Hexadecanedioic acid	十六烷二酸	FA	脂肪酰类	FFA	游离脂肪酸	285.2	286.214	[M-H]-	C16H30O4	1	84620.7	81104.4	102897	119659	83406.1	115812	106890	103037	103150	129558	97936.2	102742	C19615	HMDB0000672	10459	505-54-4	73722	5642
MEDP2068	Hexaethylene-glycol	六甘醇	Alcohol and amines	醇、胺类	Alcohols	醇类	283.2	282.168	[M+H]+	C12H26O7	2	1.57689e+06	1.82407e+06	1.14195e+06	1.28258e+06	1.43858e+06	1.07142e+06	1.98216e+06	1.34359e+06	1.27253e+06	692272	673081	534107	-	HMDB0061822	17472	2615-15-8	49793	-
MEDP2609	His-Tyr	L-组氨酸-L-酪氨酸	Amino acid and Its metabolites	氨基酸及其代谢物	Small Peptide	小肽	319.1	318.132	[M+H]+	C15H18N4O4	2	8709.32	20553	4519.53	11453.1	4653.95	28232.9	25860.5	13371.9	22415.9	9859.61	9397.59	8631.97	D81943	HMDB0028897	515713	35979-00-1	-	-
MEDP2345	His-Val	组氨酸-缬氨酸	Amino acid and Its metabolites	氨基酸及其代谢物	Small Peptide	小肽	255.1	254.138	[M+H]+	C11H18N4O3	2	21621.1	12546.6	20903.3	27156.6	6243.92	32860.8	53358.9	29430.3	10324	10987.3	24765.1	28138.1	-	HMDB0028898	7021871	76019-15-3	-	-
MEDP0047	Histamine	组胺	Alcohol and amines	醇、胺类	Polyamines	多胺	112.1	111.08	[M+H]+	C5H9N3	1	13934.8	9656.17	32990	40248.8	28230.1	39605.7	55291.1	53871.6	36995.3	27080.8	46908.1	40024.2	C00388	HMDB0000870	774	51-45-6	18295	68
MEDP0682	Hydroxyacetone	羟基丙酮	Aldehyde,Ketones,Esters	醛、酮、酯类	Ketones	酮类	75.1	74.0368	[M+H]+	C3H6O2	2	112569	101014	94274.5	121501	108563	87115	116801	81261	140826	115259	95890.7	106325	C05235	HMDB0006961	8299	116-09-6	27957	-
MEDN0555	Hydroxyphenyllactic acid	羟苯基乳酸	Organic acid And Its derivatives	有机酸及其衍生物	Organic acid And Its derivatives	有机酸及其衍生物	181.1	182.058	[M-H]-	C9H10O4	2	49769.6	61966.9	50996.9	74401.6	62928.6	68862.7	57732.9	59805.9	67683	58623.6	64564.2	57439.4	C03672	HMDB0000755	9378	306-23-0	17385	5723
MEDP1060	Hydroxyquinoline	羟喹啉	Heterocyclic compounds	杂环化合物	Heterocyclic compounds	杂环化合物	146.1	145.053	[M+H]+	C9H7NO	1	167665	196425	214706	157583	171742	170453	139904	118323	202634	156650	142105	126141	C19434	-	1923	148-24-3	-	-
MEDP2550	Hyp-Ser	L-羟脯氨酸-L-丝氨酸	Amino acid and Its metabolites	氨基酸及其代谢物	Small Peptide	小肽	219.1	218.09	[M+H]+	C8H14N2O5	2	118030	105629	122462	132145	98275.4	77504.3	100258	55802.9	78228.9	90725.1	64524.1	90981.8	-	-	-	-	-	-
MEDN2117	Hyp-Thr	L-羟脯氨酸-L-苏氨酸	Amino acid and Its metabolites	氨基酸及其代谢物	Small Peptide	小肽	231.1	232.106	[M-H]-	C9H16N2O5	2	481449	397061	367429	315929	380383	318851	351968	384631	284278	431205	442749	438336	-	-	-	-	-	-
MEDP1197	Hypotaurocyamine	下金胺	Alcohol and amines	醇、胺类	Polyamines	多胺	152	151.042	[M+H]+	C3H9N3O2S	2	2.69575e+06	3.16949e+06	4.63814e+06	6.61827e+06	5.77617e+06	5.16882e+06	5.39179e+06	5.7172e+06	4.13027e+06	4.02984e+06	4.7762e+06	4.19194e+06	C02419	-	11062553	1119-54-6	-	-
MEDN0163	Hypoxanthine	次黄嘌呤	Nucleotide And Its metabolites	核苷酸及其代谢物	Nucleotide And Its metabolites	核苷酸及其代谢物	135	136.039	[M-H]-	C5H4N4O	1	29328.4	34965	35721.7	73954.9	129053	70168.6	31291.3	31836.9	55663.6	53503	50742.5	52069.4	C00262	HMDB0000157	790	68-94-0	17368	83
MEDP2570*145	Ile-Asn	L-异亮氨酸-L-天冬酰胺	Amino acid and Its metabolites	氨基酸及其代谢物	Small Peptide	小肽	246.1	245.137	[M+H]+	C10H19N3O4	2	36636.6	31912.9	57760.8	61265.1	54408.7	28410	47217.6	22545.5	20094.2	40096.5	64938.1	38887.1	-	-	4414300	59652-59-4	-	-
MEDP2386	Ile-Gln	异亮氨酸-谷氨酰胺	Amino acid and Its metabolites	氨基酸及其代谢物	Small Peptide	小肽	260.2	259.153	[M+H]+	C11H21N3O4	2	60416.1	36968.1	86796.7	131709	46958.3	99069.7	152048	105334	32383.4	89894.6	94220.8	85609.2	-	-	7020102	59652-60-7	-	-
MEDP2392*151	Ile-Glu	异亮氨酸-谷氨酸	Amino acid and Its metabolites	氨基酸及其代谢物	Small Peptide	小肽	261.1	260.137	[M+H]+	C11H20N2O5	2	93951.2	74178.7	162660	110507	98400.7	115689	151467	161763	124538	101628	121395	112116	-	-	7009625	42516-53-0	-	-
MEDP2452	Ile-Ile	异亮氨酸-异亮氨酸	Amino acid and Its metabolites	氨基酸及其代谢物	Small Peptide	小肽	245.2	244.179	[M+H]+	C12H24N2O3	2	132746	201568	245117	284392	161069	259795	386989	423815	248898	186922	217215	198137	-	-	7010568	42537-99-5	-	-
MEDP1673	Ile-Ile-Thr	异亮氨酸-异亮氨酸-苏氨酸	Amino acid and Its metabolites	氨基酸及其代谢物	Small Peptide	小肽	346.2	345.226	[M+H]+	C16H31N3O5	2	22391.7	33623.7	21806.3	39382	39421.7	40344.9	58399.1	38554.1	35743.8	29715.9	45714.7	38632.5	-	-	-	-	-	-
MEDP2453*144	Ile-Leu	异亮氨酸-亮氨酸	Amino acid and Its metabolites	氨基酸及其代谢物	Small Peptide	小肽	245.2	244.179	[M+H]+	C12H24N2O3	2	218940	186920	404995	291984	201941	238461	314527	387055	289946	234829	282190	266174	D81944	-	7019083	26462-22-6	-	-
MEDP1870	Ile-Lys	异亮氨酸-赖氨酸	Amino acid and Its metabolites	氨基酸及其代谢物	Small Peptide	小肽	260.2	259.19	[M+H]+	C12H25N3O3	2	254041	200752	432826	400935	198606	331412	569245	467199	254271	268091	256951	284476	-	HMDB0028912	44298547	-	-	-
MEDP1871	Ile-Met	异亮氨酸-甲硫氨酸	Amino acid and Its metabolites	氨基酸及其代谢物	Small Peptide	小肽	263.1	262.135	[M+H]+	C11H22N2O3S1	2	38219.4	19418.1	71497.6	36518.4	16503	53894.7	67660.3	57047.2	67940	57600.5	33259.5	51173.4	-	HMDB0028913	7020106	42384-14-5	-	-
MEDP2387	Ile-Ser	异亮氨酸-丝氨酸	Amino acid and Its metabolites	氨基酸及其代谢物	Small Peptide	小肽	219.1	218.127	[M+H]+	C9H18N2O4	2	38886.5	35679.4	121788	78600.2	64604.6	63594.3	159636	120934	51690.8	96851.1	106031	133812	-	-	7021816	6403-14-1	-	-
MEDP2395*142	Ile-Thr	异亮氨酸-苏氨酸	Amino acid and Its metabolites	氨基酸及其代谢物	Small Peptide	小肽	233.2	232.14	[M+H]+	C10H20N2O4	2	129464	120024	221191	187152	101481	157607	321899	319221	120799	154150	141138	147348	-	HMDB0028917	18218220	59652-61-8	-	-
MEDN1991	Ile-Val	异亮氨酸-缬氨酸	Amino acid and Its metabolites	氨基酸及其代谢物	Small Peptide	小肽	229.2	230.163	[M-H]-	C11H22N2O3	2	9222.8	9312.72	14363.6	14523.6	14738.6	15624	28244.3	26119.8	25326.9	14015.9	12251.8	13644	-	-	449407	41017-96-3	-	-
MEDP2523	Imidazole-4-methanol	咪唑-4-甲醇	Heterocyclic compounds	杂环化合物	Heterocyclic compounds	杂环化合物	99.1	98.048	[M+H]+	C4H6N2O	2	5.68469e+07	6.78785e+07	6.0598e+07	6.60182e+07	6.29873e+07	6.34351e+07	7.14119e+07	6.93877e+07	6.49153e+07	7.26114e+07	6.55728e+07	6.79591e+07	-	-	122926	32673-41-9	-	-
MEDP0425	Imidazoleacetic acid	咪唑乙酸	Heterocyclic compounds	杂环化合物	Indole and Its derivatives	吲哚及其衍生物	127.1	126.043	[M+H]+	C5H6N2O2	1	2.30534e+06	2.39541e+06	2.58278e+06	3.7176e+06	3.86032e+06	2.87912e+06	3.1047e+06	2.72587e+06	2.96604e+06	2.91136e+06	2.97796e+06	2.94122e+06	C02835	HMDB0002024	96215	645-65-8	16974	6445
MEDN1056	Iminodiacetic acid	亚氨基二乙酸	Organic acid And Its derivatives	有机酸及其衍生物	Organic acid And Its derivatives	有机酸及其衍生物	132	133.037	[M-H]-	C4H7NO4	2	25607.1	23899.8	40322.7	46220.2	12020.2	26196.8	26339.2	20291.6	31062.1	31187.8	28537.5	25588.7	C19911	HMDB0011753	8897	142-73-4	24786	-
MEDP0453	Indole	吲哚	Heterocyclic compounds	杂环化合物	Indole and Its derivatives	吲哚及其衍生物	118	117.058	[M+H]+	C8H7N	1	6.18415e+06	6.16578e+06	5.31953e+06	5.50414e+06	5.96047e+06	5.31968e+06	5.85719e+06	5.83663e+06	5.23514e+06	5.26727e+06	5.01372e+06	4.83042e+06	C00463	HMDB0000738	798	120-72-9	16881	286
MEDN0562	Indole 3-carbinol	吲哚-3-甲醇	Heterocyclic compounds	杂环化合物	Indole and Its derivatives	吲哚及其衍生物	146.1	147.068	[M-H]-	C9H9NO	1	7.69371e+06	7.0406e+06	7.42835e+06	7.67446e+06	7.46331e+06	7.80138e+06	7.96342e+06	7.16712e+06	7.42174e+06	7.24369e+06	7.74209e+06	7.54074e+06	-	HMDB0005785	3712	700-06-1	24814	-
MEDP0276	Indole-3-Carboxaldehyde	吲哚-3-甲醛	Heterocyclic compounds	杂环化合物	Indole and Its derivatives	吲哚及其衍生物	146.1	145.053	[M+H]+	C9H7NO	1	608933	624740	678960	654511	650539	587032	699659	679009	652664	532689	579328	632313	C08493	HMDB0029737	10256	487-89-8	343043	-
MEDP2686	Indole-3-glyoxal	吲哚-3-乙二醛	Heterocyclic compounds	杂环化合物	Indole and Its derivatives	吲哚及其衍生物	347.1	173.048	[2M+H]+	C10H7NO2	2	2.01363e+06	2.11906e+06	2.14348e+06	2.15694e+06	2.05122e+06	1.88592e+06	2.29519e+06	2.16847e+06	2.19504e+06	1.92962e+06	2.08408e+06	2.03739e+06	-	-	13284402	7269-72-9	-	-
MEDN0523	Indole-3-lactic acid	3-吲哚-乳酸	Heterocyclic compounds	杂环化合物	Indole and Its derivatives	吲哚及其衍生物	204.1	205.074	[M-H]-	C11H11NO3	1	85052.1	82395.7	87741.6	97122.1	96623.2	80158.4	87139.1	101033	94768.2	68531.2	71444.6	71903.2	C02043	HMDB0000671	92904	1821-52-9	24813	5641
MEDP1063	Indole-5-carboxylic acid	吲哚-5-羧酸	Heterocyclic compounds	杂环化合物	Indole and Its derivatives	吲哚及其衍生物	162	161.048	[M+H]+	C9H7NO2	1	51619.1	35395.9	49193.9	53897.4	56176.3	55842.3	50793.9	53332.7	43868.9	57472	45328.7	58010.8	-	-	74280	1670-81-1	-	-
MEDN0656	Indoleacetaldehyde	吲哚乙醛	Heterocyclic compounds	杂环化合物	Indole and Its derivatives	吲哚及其衍生物	158.1	159.068	[M-H]-	C10H9NO	1	28745.8	27203.9	16501.2	31837	24527.5	33373.4	18910.5	28804	34765.5	29744	24253.5	31476.7	C00637	HMDB0001190	800	2591-98-2	18086	6068
MEDN1003	Inosine	肌苷	Nucleotide And Its metabolites	核苷酸及其代谢物	Nucleotide And Its metabolites	核苷酸及其代谢物	267.1	268.081	[M-H]-	C10H12N4O5	1	540581	641487	534154	1.1711e+06	2.5581e+06	1.83448e+06	738745	700509	1.11547e+06	978317	934407	863604	C00294	HMDB0000195	135398641	58-63-9	17596	84
MEDP2506	Inosine 5'-monophosphate	肌苷5'-单磷酸	Nucleotide And Its metabolites	核苷酸及其代谢物	Nucleotide And Its metabolites	核苷酸及其代谢物	349.1	348.047	[M+H]+	C10H13N4O8P	2	276504	254429	936168	1.00639e+06	663827	908592	1.06839e+06	1.15115e+06	395587	560006	563158	553974	C00130	HMDB0000175	135398640	131-99-7	17202	5196
MEDP2266	Inositol 1,3,4-trisphosphate	肌醇 1,3,4-三磷酸	Organic acid And Its derivatives	有机酸及其衍生物	Phosphoric acids	磷酸类化合物	421	419.962	[M+H]+	C6H15O15P3	2	3.35336e+06	3.40702e+06	3.61917e+06	3.73677e+06	3.69038e+06	3.86258e+06	3.91521e+06	3.98429e+06	3.87835e+06	3.53763e+06	3.90529e+06	3.95947e+06	C01243	HMDB0001143	439455	98102-63-7	18228	6035
MEDN2059	Inositol 1-phosphate	1-磷酸肌醇	Alcohol and amines	醇、胺类	Alcohols	醇类	259	260.03	[M-H]-	C6H13O9P	1	557095	418038	415097	683020	527931	559944	504727	436389	494391	422812	628021	494230	-	HMDB00213	107737	573-35-3	18169	5223
MEDN1621*036	Isocitric acid	异柠檬酸	Organic acid And Its derivatives	有机酸及其衍生物	Organic acid And Its derivatives	有机酸及其衍生物	191	192.027	[M-H]-	C6H8O7	2	100065	124161	132517	284619	343957	286458	169249	186877	161354	122300	170266	143948	C00311	HMDB0000193	1198	320-77-4	30887	3328
MEDP0627	Isonicotinic acid	异烟酸	Organic acid And Its derivatives	有机酸及其衍生物	Organic acid And Its derivatives	有机酸及其衍生物	124	123.032	[M+H]+	C6H5NO2	2	3.02931e+06	3.45242e+06	3.4425e+06	4.24979e+06	3.6676e+06	3.57793e+06	3.07562e+06	3.88086e+06	5.13641e+06	2.75487e+06	3.61485e+06	3.52146e+06	C07446	HMDB0060665	5922	55-22-1	6032	-
MEDN2292	Isopropyl 3-(3,4-dihydroxyphenyl)-2-hydroxypropanoate	3-(3,4-二羟基苯基)-2-羟基丙酸异丙酯	Benzene and substituted derivatives	苯及其衍生物	Benzene and substituted derivatives	苯及其衍生物	239.1	240.1	[M-H]-	C12H16O5	2	236988	315692	305820	326701	329154	351897	354672	369205	328983	339618	415246	339335	-	-	44234503	-	-	-
MEDP0454	Isoquinoline	异喹啉	Heterocyclic compounds	杂环化合物	Heterocyclic compounds	杂环化合物	130.1	129.058	[M+H]+	C9H7N	2	492912	552834	460270	512241	485659	524037	616792	604558	484137	436328	481674	472036	C06323	HMDB0034244	8405	119-65-3	16092	-
MEDP1076*162	Kojibiose	曲二糖	Others	其他	Others	其他	325.1	342.116	[M-H2O+H]+	C12H22O11	2	773106	790669	466119	4.44339e+06	789338	1.21258e+06	868070	1.32681e+06	610667	1.34799e+06	801930	686867	C19632	HMDB0011742	164939	2140-29-6	33020	-
MEDN1235	L-2-amino-6-oximelic acid	L-2-氨基-6-氧庚二酸	Organic acid And Its derivatives	有机酸及其衍生物	Organic acid And Its derivatives	有机酸及其衍生物	188.1	189.064	[M-H]-	C7H11NO5	2	5682.19	11934.2	9178.95	9806.66	10043.8	12536	8603.11	13440.3	7792.02	10184.1	14828.2	5875.49	C03871	-	194695	75650-93-0	-	-
MEDP0013*102	L-Alanine	L-丙氨酸	Amino acid and Its metabolites	氨基酸及其代谢物	Amino acids	氨基酸	90	89.048	[M+H]+	C3H7NO2	1	424748	787807	667495	533329	423517	521265	563545	445624	562050	447335	836194	999630	C00041	HMDB0000161	5950	56-41-7	16977	-
MEDP0010	L-Arginine	L-精氨酸	Amino acid and Its metabolites	氨基酸及其代谢物	Amino acids	氨基酸	175	174.112	[M+H]+	C6H14N4O2	1	6.23196e+06	6.22627e+06	5.73028e+06	6.79208e+06	6.64674e+06	6.07467e+06	5.77765e+06	6.19398e+06	5.69371e+06	6.0246e+06	5.14385e+06	6.20569e+06	C00062	HMDB0000517	6322	74-79-3	16467	5502
MEDN1558	L-Ascorbyl 6-palmitate	L-抗坏血酸6-棕榈酸酯	Aldehyde,Ketones,Esters	醛、酮、酯类	Esters	酯类	413.3	414.262	[M-H]-	C22H38O7	2	35383.8	32408.7	46185.6	33998.7	34171.3	42144.4	40185.9	35951.4	31654.8	51934.3	57161.5	51638.1	D02412	HMDB0039883	54680660	137-66-6	-	-
MEDP0049	L-Asparagine Anhydrous	L-天冬酰胺	Amino acid and Its metabolites	氨基酸及其代谢物	Amino acids	氨基酸	133.1	132.054	[M+H]+	C4H8N2O3	1	628257	618189	621414	612139	590219	461969	544148	580658	613092	627814	635101	661476	C00152	HMDB0000168	6267	70-47-3	17196	14
MEDN0009	L-Aspartic Acid	L-天冬氨酸	Amino acid and Its metabolites	氨基酸及其代谢物	Amino acids	氨基酸	132	133.038	[M-H]-	C4H7NO4	2	25607.1	23899.8	40322.7	46220.2	12020.2	26196.8	26339.2	20291.6	31062.1	31187.8	28537.5	25588.7	C00049	HMDB0000191	5960	56-84-8	17053	5206
MEDP0050	L-Carnosine	左旋肌肽	Amino acid and Its metabolites	氨基酸及其代谢物	Amino acid derivatives	氨基酸衍生物	227.2	226.107	[M+H]+	C9H14N4O3	2	9	1939.72	10389.7	10539.8	8053.03	5990.8	6661.15	12540.4	14992.9	13903.6	17741.9	14299.6	C00386	HMDB0000033	439224	305-84-0	15727	38
MEDN0010	L-Citrulline	L-瓜氨酸	Amino acid and Its metabolites	氨基酸及其代谢物	Amino acids	氨基酸	174.1	175.096	[M-H]-	C6H13N3O3	1	1539.79	7338.32	2094.11	23180.7	8722.82	14133.1	17257.5	14122.5	777.37	13524.5	22939.6	22534.3	C00327	HMDB0000904	9750	372-75-8	16349	16
MEDP0051	L-Cystathionine	L-胱硫醚	Amino acid and Its metabolites	氨基酸及其代谢物	Amino acid derivatives	氨基酸衍生物	223	222.067	[M+H]+	C7H14N2O4S	2	34124.5	43246.3	14710.3	49462.6	23517.8	32394.6	28969.8	23403.2	22848.8	38240.3	27843.9	36821.6	C02291	HMDB0000099	439258	56-88-2	17482	39
MEDP0052	L-Cysteine	L-半胱氨酸	Amino acid and Its metabolites	氨基酸及其代谢物	Amino acids	氨基酸	122	121.02	[M+H]+	C3H7NO2S	1	2.43548e+06	2.88643e+06	2.61778e+06	2.91544e+06	4.12402e+06	3.21737e+06	3.64893e+06	3.46702e+06	2.5581e+06	2.68488e+06	2.72081e+06	2.79427e+06	C00097	HMDB0000574	5862	52-90-4	17561	5556
MEDP0007	L-Cystine	L-胱氨酸	Amino acid and Its metabolites	氨基酸及其代谢物	Amino acids	氨基酸	241	240.024	[M+H]+	C6H12N2O4S2	2	19373.2	4052.8	9588.82	20841	15082.3	12441.7	4778.45	18726.9	16924.3	12634.2	7336.4	4952.57	C00491	HMDB0000192	67678	56-89-3	16283	5207
MEDN0327	L-Dihydroorotic Acid	L-氢化乳清酸	Organic acid And Its derivatives	有机酸及其衍生物	Organic acid And Its derivatives	有机酸及其衍生物	157	158.033	[M-H]-	C5H6N2O4	2	143852	193276	193423	156037	190930	199166	204971	196322	168356	179623	157242	183638	C00337	HMDB0003349	439216	5988-19-2	17025	6899
MEDP0053	L-Dopa	L-多巴	Amino acid and Its metabolites	氨基酸及其代谢物	Amino acid derivatives	氨基酸衍生物	198.1	197.069	[M+H]+	C9H11NO4	2	77697.3	84708.4	142067	148475	83899.6	167438	121942	123985	73782.1	128986	98611.1	105510	C00355	HMDB0000181	6047	59-92-7	15765	42
MEDN2058*042	L-Glucaric acid	L-葡萄糖酸	Carbohydrates and Its metabolites	碳水化合物及其代谢物	Sugar acids	糖酸	209	210.038	[M-H]-	C6H10O8	2	102640	118452	110339	87819.5	108293	123544	115482	85881.6	93588.4	240549	207785	229693	-	-	5460673	576-42-1	-	-
MEDP0016	L-Glutamic Acid	L-谷氨酸	Amino acid and Its metabolites	氨基酸及其代谢物	Amino acids	氨基酸	148.1	147.053	[M+H]+	C5H9NO4	1	154941	151811	135863	267168	310690	380269	293121	226407	265362	275184	279124	291098	C00025	HMDB0000148	33032	56-86-0	16015	5174
MEDP0054	L-Glutamine	L-谷氨酰胺	Amino acid and Its metabolites	氨基酸及其代谢物	Amino acids	氨基酸	147.1	146.069	[M+H]+	C5H10N2O3	1	299320	304290	368566	371617	276968	260306	542151	519148	293787	343457	292219	354703	C00064	HMDB0000641	5961	56-85-9	18050	5614
MEDP0006	L-Glycine	甘氨酸	Amino acid and Its metabolites	氨基酸及其代谢物	Amino acids	氨基酸	76	75.032	[M+H]+	C2H5NO2	1	9	9532.04	11412.4	14731.6	11505.8	8093.01	17035.1	15980	8578.99	8633.36	16138.4	10483.3	C00037	HMDB0000123	750	56-40-6	15428	20
MEDP0017	L-Histidine	L-组氨酸	Amino acid and Its metabolites	氨基酸及其代谢物	Amino acids	氨基酸	156.1	155.07	[M+H]+	C6H9N3O2	1	202338	179061	165993	175223	211891	231409	251213	274096	233118	180120	266294	236433	C00135	HMDB0000177	6274	71-00-1	15971	21
MEDN0325	L-Lactic Acid	L-乳酸	Organic acid And Its derivatives	有机酸及其衍生物	Organic acid And Its derivatives	有机酸及其衍生物	89	90.0317	[M-H]-	C3H6O3	1	26274.3	20346.4	11433.2	9538.57	14902.1	11063.2	24825.4	15229	18182	22967.6	15396.8	12248.4	C00186	HMDB0000190	107689	79-33-4	422	5205
MEDP0011	L-Lysine	L-赖氨酸	Amino acid and Its metabolites	氨基酸及其代谢物	Amino acids	氨基酸	147	146.106	[M+H]+	C6H14N2O2	1	208679	301868	363624	333935	176398	335518	524966	538724	329441	362034	323004	346578	C00047	HMDB0000182	5962	56-87-1	18019	5200
MEDP0020	L-Methionine	L-蛋氨酸	Amino acid and Its metabolites	氨基酸及其代谢物	Amino acids	氨基酸	150	149.051	[M+H]+	C5H11NO2S	1	77017.3	101229	210549	103787	88011.8	106961	163731	142462	101001	91002.4	121487	106059	C00073	HMDB0000696	6137	63-68-3	16643	5664
MEDP0884	L-Methionine Sulfoximine	L-蛋氨酸亚砜亚胺	Amino acid and Its metabolites	氨基酸及其代谢物	Amino acid derivatives	氨基酸衍生物	181.3	180.057	[M+H]+	C5H12N2O3S	2	13747	34715.9	13858.2	12935.8	10664.3	18870	10323.7	18422.9	10331.8	7211.35	13776.7	7170.13	C03510	HMDB0029430	16118	15985-39-4	47833	-
MEDP2322	L-NIO-hydrochloride	L-NIO盐酸盐	Amino acid and Its metabolites	氨基酸及其代谢物	Amino acid derivatives	氨基酸衍生物	174.1	173.116	[M+H]+	C7H15N3O2	1	382341	409734	447065	389027	358670	406778	398662	410894	412159	428715	432354	442108	-	-	107984	36889-13-1	-	-
MEDP0519*114	L-Norleucine	L-正亮氨酸	Amino acid and Its metabolites	氨基酸及其代谢物	Amino acids	氨基酸	132.1	131.095	[M+H]+	C6H13NO2	1	3.40163e+06	3.2858e+06	6.1759e+06	5.17777e+06	3.00709e+06	4.02389e+06	6.88063e+06	6.50506e+06	4.08695e+06	4.6788e+06	4.32607e+06	4.33828e+06	C01933	HMDB0001645	6334	327-57-1	18347	6334
MEDP1778*110	L-Norvaline	L-正缬氨酸	Amino acid and Its metabolites	氨基酸及其代谢物	Amino acids	氨基酸	118.1	117.079	[M+H]+	C5H11NO2	1	436223	1.1205e+06	753594	297604	1.56846e+06	976346	1.04011e+06	896226	426203	1.03536e+06	1.25687e+06	1.13238e+06	C01826	-	65098	6600-40-4	-	-
MEDN0015	L-Phenylalanine	L-苯丙氨酸	Amino acid and Its metabolites	氨基酸及其代谢物	Amino acids	氨基酸	164.1	165.079	[M-H]-	C9H11NO2	1	1.55453e+07	1.55128e+07	1.54559e+07	1.51161e+07	1.67601e+07	1.46878e+07	1.59383e+07	1.58745e+07	1.66179e+07	1.33694e+07	1.46738e+07	1.52502e+07	C00079	HMDB0000159	6140	63-91-2	17295	28
MEDP1477	L-Phenylephrine	L-去氧肾上腺素	Hormones and hormone related compounds	激素及激素相关物质	Hormones and hormone related compounds	激素及激素相关物质	168	167.095	[M+H]+	C9H13NO2	2	443473	124814	202837	720382	774708	482196	343937	388540	203517	273980	225668	341885	C07441	HMDB0002182	6041	59-42-7	8093	699
MEDP0022*108	L-Proline	L-脯氨酸	Amino acid and Its metabolites	氨基酸及其代谢物	Amino acids	氨基酸	116.1	115.063	[M+H]+	C5H9NO2	1	86912.6	100614	219562	218555	193474	241981	256377	227237	95651	238959	216688	222007	C00148	HMDB0000162	145742	147-85-3	17203	29
MEDN2102	L-Rhamnonic acid	L-鼠李糖酸	Carbohydrates and Its metabolites	碳水化合物及其代谢物	Sugar acids	糖酸	179.1	180.063	[M-H]-	C6H12O6	2	19954.6	29510.3	29032.7	27995.7	13595.3	13803	25864.1	11331.3	15020	11842.8	13605.8	12807.5	C01934	-	6602429	6422-34-0	-	-
MEDN0049	L-Saccharopine	L-酵母氨酸	Amino acid and Its metabolites	氨基酸及其代谢物	Amino acids	氨基酸	275.1	276.132	[M-H]-	C11H20N2O6	2	790172	634421	832030	639796	676801	709102	760932	614575	748171	806539	659750	740241	C00449	HMDB0000279	160556	997-68-2	16927	383
MEDN0018	L-Serine	L-丝氨酸	Amino acid and Its metabolites	氨基酸及其代谢物	Amino acids	氨基酸	104	105.043	[M-H]-	C3H7NO3	1	11149.9	6365.02	18979.7	18675.4	11853.8	7979.78	7608.95	12752.9	14385.8	10838.7	11011.6	12976.8	C00065	HMDB0000187	5951	56-45-1	17115	5203
MEDN0050	L-Theanine	茶氨酸	Amino acid and Its metabolites	氨基酸及其代谢物	Amino acids	氨基酸	173.1	174.1	[M-H]-	C7H14N2O3	2	181653	152705	162849	171228	250442	172843	140733	230699	182126	188863	156455	142324	C01047	HMDB0034365	228398	3081-61-6	17394	-
MEDN0019	L-Tryptophan	L-色氨酸	Amino acid and Its metabolites	氨基酸及其代谢物	Amino acids	氨基酸	203.1	204.09	[M-H]-	C11H12N2O2	1	10690.2	11949.9	9571.68	10167.2	13649.2	7364.68	7315.66	9250.86	9551.6	8322.79	9703.27	7200.65	C00078	HMDB0000929	6305	73-22-3	16828	5879
MEDP0009*130	L-Tyrosine	L-酪氨酸	Amino acid and Its metabolites	氨基酸及其代谢物	Amino acids	氨基酸	182.1	181.074	[M+H]+	C9H11NO3	1	659392	752871	1.05644e+06	992903	623047	608277	1.07395e+06	844353	907748	1.18016e+06	1.0895e+06	1.12185e+06	C00082	HMDB0000158	6057	60-18-4	17895	34
MEDP0026*110	L-Valine	L-缬氨酸	Amino acid and Its metabolites	氨基酸及其代谢物	Amino acids	氨基酸	118.1	117.079	[M+H]+	C5H11NO2	1	436223	1.1205e+06	753594	297604	1.56846e+06	976346	1.04011e+06	896226	426203	1.03536e+06	1.25687e+06	1.13238e+06	C00183	HMDB0000883	6287	72-18-4	16414	5842
MEDN1931*020	L-lyxose	L-来苏糖	Carbohydrates and Its metabolites	碳水化合物及其代谢物	Carbohydrates and Its metabolites	碳水化合物及其代谢物	149	150.13	[M-H]-	C5H10O5	2	193829	162906	133562	168315	115177	133737	105852	177174	169468	170390	232782	158670	-	-	644176	1949-78-6	-	-
MEDN2392	LPA(0:0/18:1)	溶血磷脂酸_LPA(0:0/18:1)	GP	甘油磷脂类	LPA	溶血磷脂酸	435.3	436.259	[M-H]-	C21H41O7P	2	95022.3	98806.8	118030	129282	121287	112422	125260	97779.7	90622.9	85545.6	85792.3	84452.9	C00681	-	52929749	-	-	-
MEDN1643	LPA(18:1/0:0)	LPA(18:1/0:0)	GP	甘油磷脂类	LPA	溶血磷脂酸	435.2	436.259	[M-H]-	C21H41O7P	1	73077.6	81234.6	100564	114820	118022	97122.8	91648.6	97832.3	90848.9	85292.9	97960.2	71324.6	-	HMDB0007855	5497152	-	-	-
MEDP2690	LPA(20:0/0:0)	LPA(20:0/0:0)	GP	甘油磷脂类	LPA	溶血磷脂酸	508.3	466.306	[M+CH3CN+H]+	C23H47O7P	2	206464	200603	200898	191587	239502	261208	198103	193888	236475	193599	217528	221285	-	-	52929752	-	-	-
MEDN2394	LPA(20:4)	溶血磷脂酸_LPA(20:4)	GP	甘油磷脂类	LPA	溶血磷脂酸	457.2	458.243	[M-H]-	C23H39O7P	2	47420.4	43754	54042.3	50969.6	39154.4	48631.4	37806	35332.9	48612.3	44491.8	44927.2	38595	C00681	-	42607498	-	-	-
MEDN2400	LPA(20:5)	溶血磷脂酸_LPA(20:5)	GP	甘油磷脂类	LPA	溶血磷脂酸	455.2	456.228	[M-H]-	C23H37O7P	2	207698	173308	229592	242652	271962	197900	174522	223055	205455	171721	151324	147647	C00681	-	52929765	-	-	-
MEDP0336	LPC(0:0/14:0)	LPC(0:0/14:0)	GP	甘油磷脂类	LPC	溶血磷脂酰胆碱	468.3	467.301	[M+H]+	C22H46NO7P	1	87244.7	84190.6	100544	105700	115014	102355	77204.1	98211.1	94567.5	79723.7	105131	95147	-	-	24779490	-	-	-
MEDP2790	LPC(0:0/14:1)	LPC(0:0/14:1)	GP	甘油磷脂类	LPC	溶血磷脂酰胆碱	466.3	465.286	[M+H]+	C22H44NO7P	1	133239	133548	122652	99868.1	81355.6	76047.5	71574.3	81307.2	104213	80218.6	95512.9	91914.7	-	-	-	-	-	-
MEDP1692	LPC(0:0/15:0)	LPC(0:0/15:0)	GP	甘油磷脂类	LPC	溶血磷脂酰胆碱	482.3	481.317	[M+H]+	C23H48NO7P	1	3.38816e+06	2.65034e+06	3.38498e+06	2.9114e+06	3.52555e+06	2.78879e+06	2.39574e+06	2.64764e+06	2.51795e+06	2.55062e+06	2.43717e+06	2.58411e+06	-	-	-	108273-89-8	-	-
MEDP1346	LPC(0:0/16:0)	LPC(0:0/16:0)	GP	甘油磷脂类	LPC	溶血磷脂酰胆碱	496.3	495.332	[M+H]+	C24H50NO7P	1	35897	33815.3	30355.4	43919.1	30894.4	41724	49269.1	41437.8	34182.1	30904.1	31694.5	42883.6	-	-	-	-	-	-
MEDP1699	LPC(0:0/16:1)	LPC(0:0/16:1)	GP	甘油磷脂类	LPC	溶血磷脂酰胆碱	494.3	493.317	[M+H]+	C24H48NO7P	1	888065	916477	992832	973790	1.0695e+06	945171	896294	972797	813323	777919	825821	859028	-	-	-	-	-	-
MEDP2831	LPC(0:0/17:0)	LPC(0:0/17:0)	GP	甘油磷脂类	LPC	溶血磷脂酰胆碱	510.4	509.348	[M+H]+	C25H52NO7P	1	5.30627e+07	5.44757e+07	5.29777e+07	5.55165e+07	5.4246e+07	4.71664e+07	5.18533e+07	5.4084e+07	5.55742e+07	4.67617e+07	4.40625e+07	4.67558e+07	C04230	-	-	-	-	-
MEDP1700	LPC(0:0/18:0)	LPC(0:0/18:0)	GP	甘油磷脂类	LPC	溶血磷脂酰胆碱	524.4	523.364	[M+H]+	C26H54NO7P	1	25971.7	55731.2	34184.9	48986.5	50570.1	55553.2	42500.2	56605.7	64836.6	47742.1	43167.4	33620.4	-	-	-	-	-	-
MEDP1701	LPC(0:0/18:1)	LPC(0:0/18:1)	GP	甘油磷脂类	LPC	溶血磷脂酰胆碱	522.3	521.348	[M+H]+	C26H52NO7P	1	233341	253521	262258	360813	377719	350638	290794	313268	271817	260741	267568	265110	-	-	-	-	-	-
MEDP0495	LPC(0:0/18:2)	LPC(0:0/18:2)	GP	甘油磷脂类	LPC	溶血磷脂酰胆碱	520.3	519.332	[M+H]+	C26H50NO7P	1	51161.3	41223.5	57901.2	44365.5	52573.1	41693.2	52027.2	36657.8	39363	43572.4	36324.3	44199.2	-	-	-	-	-	-
MEDP1343	LPC(0:0/18:3)	LPC(0:0/18:3)	GP	甘油磷脂类	LPC	溶血磷脂酰胆碱	518.3	517.317	[M+H]+	C26H48NO7P	1	2.67663e+06	2.78966e+06	3.01863e+06	2.90956e+06	2.70699e+06	2.5975e+06	2.082e+06	2.18436e+06	2.26512e+06	1.98542e+06	2.163e+06	2.05884e+06	-	-	-	-	-	-
MEDP2832	LPC(0:0/19:0)	LPC(0:0/19:0)	GP	甘油磷脂类	LPC	溶血磷脂酰胆碱	538.4	537.379	[M+H]+	C27H56NO7P	1	2.91886e+08	5.09838e+08	3.11226e+08	2.90879e+08	2.54447e+08	279479906	2.75504e+08	2.96185e+08	4.84262e+08	2.41813e+08	2.32174e+08	2.58708e+08	C04230	-	-	-	-	-
MEDP2834	LPC(0:0/20:0)	LPC(0:0/20:0)	GP	甘油磷脂类	LPC	溶血磷脂酰胆碱	552.4	551.395	[M+H]+	C28H58NO7P	1	39499.5	126829	45304.2	49289.2	51692.6	49943.3	43734	43981.5	102827	42630.5	41199	43381.6	C04230	-	-	-	-	-
MEDP1702	LPC(0:0/20:1)	LPC(0:0/20:1)	GP	甘油磷脂类	LPC	溶血磷脂酰胆碱	550.4	549.379	[M+H]+	C28H56NO7P	1	277977	274671	292624	369832	375901	359899	319356	328718	323210	282119	272674	277799	-	-	-	-	-	-
MEDP1330	LPC(0:0/20:2)	LPC(0:0/20:2)	GP	甘油磷脂类	LPC	溶血磷脂酰胆碱	548.4	547.364	[M+H]+	C28H54NO7P	1	1.74609e+06	1.84775e+06	2.06291e+06	1.93763e+06	1.55472e+06	2.02151e+06	1.6434e+06	1.6313e+06	1.44948e+06	1.43091e+06	1.4827e+06	1.52424e+06	-	-	-	-	-	-
MEDP1331	LPC(0:0/20:3)	LPC(0:0/20:3)	GP	甘油磷脂类	LPC	溶血磷脂酰胆碱	546.3	545.348	[M+H]+	C28H52NO7P	1	2.02391e+07	1.94404e+07	1.97793e+07	2.7137e+07	2.54019e+07	2.30152e+07	1.75951e+07	2.09526e+07	2.09374e+07	1.75505e+07	1.80156e+07	1.70871e+07	-	-	-	-	-	-
MEDP1333	LPC(0:0/20:4)	LPC(0:0/20:4)	GP	甘油磷脂类	LPC	溶血磷脂酰胆碱	544.3	543.332	[M+H]+	C28H50NO7P	1	3.38544e+06	3.43249e+06	3.55772e+06	3.60501e+06	3.40941e+06	2.85724e+06	2.56322e+06	1.69568e+06	2.56044e+06	2.50552e+06	2.44411e+06	2.6263e+06	-	-	-	-	-	-
MEDP1336	LPC(0:0/20:5)	LPC(0:0/20:5)	GP	甘油磷脂类	LPC	溶血磷脂酰胆碱	542.3	541.317	[M+H]+	C28H48NO7P	2	5.63136e+07	5.69703e+07	6.20334e+07	7.91134e+07	7.18999e+07	6.83593e+07	5.48939e+07	6.19855e+07	5.43976e+07	5.64035e+07	5.37091e+07	5.32261e+07	-	-	-	-	-	-
MEDP1321	LPC(0:0/22:5)	LPC(0:0/22:5)	GP	甘油磷脂类	LPC	溶血磷脂酰胆碱	570.3	569.348	[M+H]+	C30H52NO7P	1	133388	166897	145501	138729	113503	128670	107693	114792	93433.8	116002	110771	105304	-	-	-	-	-	-
MEDP2830	LPC(14:0/0:0)	LPC(14:0/0:0)	GP	甘油磷脂类	LPC	溶血磷脂酰胆碱	468.3	467.301	[M+H]+	C22H46NO7P	1	223580	243722	196330	263327	310404	245961	181282	209260	269439	209977	228277	239162	C04230	HMDB0010379	460604	20559-16-4	64489	-
MEDP1697	LPC(14:1/0:0)	LPC(14:1/0:0)	GP	甘油磷脂类	LPC	溶血磷脂酰胆碱	466.3	465.286	[M+H]+	C22H44NO7P	1	139561	144322	155752	104572	94426.6	119998	122008	83379	119405	84141.5	98628.4	127721	-	-	-	-	-	-
MEDP0494	LPC(15:0/0:0)	LPC(15:0/0:0)	GP	甘油磷脂类	LPC	溶血磷脂酰胆碱	482.3	481.317	[M+H]+	C23H48NO7P	1	3.68374e+06	3.5628e+06	3.55344e+06	2.99667e+06	3.40776e+06	2.85617e+06	2.50059e+06	2.70711e+06	2.65312e+06	2.56547e+06	2.77572e+06	2.50746e+06	-	HMDB0010381	-	-	580912	-
MEDP0338	LPC(16:0/0:0)	LPC(16:0/0:0)	GP	甘油磷脂类	LPC	溶血磷脂酰胆碱	496.3	495.332	[M+H]+	C24H50NO7P	1	36626.8	34743.3	35543	48612.8	44582.4	39044.3	48663.3	39337.3	45273.8	35903.5	28201.9	33865.3	C04230	HMDB0010382	460602	17364-16-8	72998	-
MEDP1348	LPC(16:1/0:0)	LPC(16:1/0:0)	GP	甘油磷脂类	LPC	溶血磷脂酰胆碱	494.3	493.317	[M+H]+	C24H48NO7P	1	1.06033e+06	1.0106e+06	1.05017e+06	1.06606e+06	1.12165e+06	1.11389e+06	1.02125e+06	1.1376e+06	1.0678e+06	975864	929029	993911	-	HMDB0010383	24779461	-	73851	-
MEDP0434	LPC(17:0/0:0)	LPC(17:0/0:0)	GP	甘油磷脂类	LPC	溶血磷脂酰胆碱	510.1	509.348	[M+H]+	C25H52NO7P	1	8.99073e+07	9.76812e+07	8.77479e+07	8.6556e+07	9.19397e+07	8.26871e+07	9.65748e+07	8.35689e+07	1.03407e+08	7.70384e+07	7.71642e+07	8.12598e+07	C04230	HMDB0012108	24779463	50930-23-9	74340	-
MEDP2836	LPC(17:1/0:0)	LPC(17:1/0:0)	GP	甘油磷脂类	LPC	溶血磷脂酰胆碱	508.3	507.332	[M+H]+	C25H50NO7P	1	7.22043e+06	4.26154e+06	6.85042e+06	6.65659e+06	7.33502e+06	5.88515e+06	5.07587e+06	5.70255e+06	6.04569e+06	5.38526e+06	5.30975e+06	5.27371e+06	C04230	-	42607442	-	-	-
MEDP2744	LPC(17:2/0:0)	LPC(17:2/0:0)	GP	甘油磷脂类	LPC	溶血磷脂酰胆碱	506.3	505.317	[M+H]+	C25H48NO7P	2	476573	466252	470412	352291	396685	309779	303373	255776	290823	288875	288052	294074	-	-	52924043	-	-	-
MEDP1337	LPC(18:0/0:0)	LPC(18:0/0:0)	GP	甘油磷脂类	LPC	溶血磷脂酰胆碱	524.4	523.364	[M+H]+	C26H54NO7P	1	34907.3	75353.8	33812.4	48477.6	44647.5	49707.7	43117.6	38624.5	73304.4	39263.2	33804.4	39355.5	-	HMDB0010384	497299	-	73858	-
MEDP1339	LPC(18:1/0:0)	LPC(18:1/0:0)	GP	甘油磷脂类	LPC	溶血磷脂酰胆碱	522.3	521.348	[M+H]+	C26H52NO7P	1	306988	300557	317939	379882	423248	329858	277955	266096	337563	311355	260970	273743	-	HMDB0010385	53480465	3542-29-8	86255	-
MEDP1341	LPC(18:2/0:0)	LPC(18:2/0:0)	GP	甘油磷脂类	LPC	溶血磷脂酰胆碱	520.3	519.332	[M+H]+	C26H50NO7P	1	62366.6	61553.3	74465.2	64037.3	45822	53701.5	46110.4	42681.7	40393.9	34147.5	36298.9	41885.9	-	HMDB0010386	11005824	-	28733	-
MEDP1345	LPC(18:3/0:0)	LPC(18:3/0:0)	GP	甘油磷脂类	LPC	溶血磷脂酰胆碱	518.3	517.317	[M+H]+	C26H48NO7P	1	2.67402e+06	2.73971e+06	2.90552e+06	2.83871e+06	2.72342e+06	2.64482e+06	2.05642e+06	2.2756e+06	2.11888e+06	2.07647e+06	2.14531e+06	2.12001e+06	-	HMDB0010387	-	-	88698	-
MEDP1696	LPC(18:4/0:0)	LPC(18:4/0:0)	GP	甘油磷脂类	LPC	溶血磷脂酰胆碱	516.3	515.301	[M+H]+	C26H46NO7P	2	243154	221054	288778	270508	281478	276726	203085	160480	160895	155739	195737	181286	-	-	-	-	-	-
MEDP2833	LPC(19:0/0:0)	LPC(19:0/0:0)	GP	甘油磷脂类	LPC	溶血磷脂酰胆碱	538.4	537.379	[M+H]+	C27H56NO7P	1	3.06765e+08	5.23394e+08	3.24533e+08	293972858	2.8805e+08	299149651	2.85365e+08	2.99553e+08	495631855	2.66506e+08	2.77465e+08	2.74365e+08	C04230	-	24779472	-	-	-
MEDP2837	LPC(19:1/0:0)	LPC(19:1/0:0)	GP	甘油磷脂类	LPC	溶血磷脂酰胆碱	536.4	535.364	[M+H]+	C27H54NO7P	1	9.06832e+06	9.43101e+06	9.78698e+06	8.95353e+06	8.83645e+06	8.79871e+06	7.40998e+06	7.49298e+06	7.42031e+06	7.53823e+06	7.62526e+06	7.61288e+06	C04230	-	52924049	-	-	-
MEDP2745	LPC(19:2)	LPC(19:2)	GP	甘油磷脂类	LPC	溶血磷脂酰胆碱	534.4	533.348	[M+H]+	C27H52NO7P	2	2.47724e+06	2.53617e+06	2.59348e+06	2.93926e+06	2.87314e+06	2.64672e+06	2.04564e+06	2.02456e+06	2.23253e+06	2.09908e+06	2.09628e+06	2.15933e+06	-	-	138152902	-	-	-
MEDP1326	LPC(20:1/0:0)	LPC(20:1/0:0)	GP	甘油磷脂类	LPC	溶血磷脂酰胆碱	550.4	549.379	[M+H]+	C28H56NO7P	1	242895	250324	250172	345177	360651	326222	270020	298040	309696	258153	256053	269997	-	HMDB0010391	52924051	-	88685	-
MEDP1328	LPC(20:2/0:0)	LPC(20:2/0:0)	GP	甘油磷脂类	LPC	溶血磷脂酰胆碱	548.4	547.364	[M+H]+	C28H54NO7P	1	2.50002e+06	2.29621e+06	2.62334e+06	2.41569e+06	2.35737e+06	2.20032e+06	1.6284e+06	1.82637e+06	2.04766e+06	1.6836e+06	1.71847e+06	1.81807e+06	-	HMDB0010392	52924053	-	83055	-
MEDP1332	LPC(20:3/0:0)	LPC(20:3/0:0)	GP	甘油磷脂类	LPC	溶血磷脂酰胆碱	546.3	545.348	[M+H]+	C28H52NO7P	1	1.1392e+07	1.15401e+07	1.36335e+07	1.58501e+07	1.56182e+07	1.63601e+07	1.3109e+07	1.39259e+07	1.11257e+07	1.20998e+07	1.16718e+07	1.19934e+07	-	-	-	-	-	-
MEDP1334	LPC(20:4/0:0)	LPC(20:4/0:0)	GP	甘油磷脂类	LPC	溶血磷脂酰胆碱	544.3	543.332	[M+H]+	C28H50NO7P	1	5.11909e+06	5.78185e+06	6.42704e+06	7.16971e+06	6.83047e+06	6.71653e+06	4.76864e+06	5.15654e+06	5.19237e+06	5.11356e+06	5.09247e+06	4.8011e+06	-	-	-	-	-	-
MEDP1335	LPC(20:5/0:0)	LPC(20:5/0:0)	GP	甘油磷脂类	LPC	溶血磷脂酰胆碱	542.3	541.317	[M+H]+	C28H48NO7P	2	5.54699e+07	5.92918e+07	6.4495e+07	7.25709e+07	6.77541e+07	6.81153e+07	6.39502e+07	6.48244e+07	5.5476e+07	5.74536e+07	5.19354e+07	5.17799e+07	-	-	-	-	-	-
MEDP1319	LPC(22:4/0:0)	LPC(22:4/0:0)	GP	甘油磷脂类	LPC	溶血磷脂酰胆碱	572.4	571.364	[M+H]+	C30H54NO7P	1	149661	175522	69552.9	64928.6	164966	60098.8	39878.1	33040.8	42646.6	47484.1	51549	35285.1	-	-	-	-	-	-
MEDP1322	LPC(22:5/0:0)	LPC(22:5/0:0)	GP	甘油磷脂类	LPC	溶血磷脂酰胆碱	570.3	569.348	[M+H]+	C30H52NO7P	1	181624	190760	205774	144284	167160	178846	135602	141000	104625	158235	153984	139591	-	-	-	-	-	-
MEDP1658	LPC(O-18:1)	LPC(O-18:1)	GP	甘油磷脂类	LPC-O	溶血磷脂酰胆碱(醚键)	508.4	507.369	[M+H]+	C26H54NO6P	1	37200.3	40444.8	48584.5	52963	66537.8	57151.5	73315.1	52612	49919	41018.2	39111.1	44641.7	-	-	24779510	87907-66-2	-	-
MEDP2844	LPC(O-20:1)	LPC(O-20:1)	GP	甘油磷脂类	LPC-O	溶血磷脂酰胆碱(醚键)	536.4	535.4	[M+H]+	C28H58NO6P	1	63034	123006	70324.4	62918.6	63893.1	72389.7	75604.6	72486.1	117147	64234.9	65856.3	78579.5	C04230	-	-	-	-	-
MEDP2848	LPC(O-20:3)	LPC(O-20:3)	GP	甘油磷脂类	LPC-O	溶血磷脂酰胆碱(醚键)	532.4	531.369	[M+H]+	C28H54NO6P	1	633972	714078	673456	750752	805426	716375	521758	562844	575239	497576	524010	502151	C04230	-	-	-	-	-
MEDP2847	LPC(O-22:2)	LPC(O-22:2)	GP	甘油磷脂类	LPC-O	溶血磷脂酰胆碱(醚键)	562.4	561.416	[M+H]+	C30H60NO6P	1	7.08557e+06	1.38832e+07	8.22807e+06	8.60066e+06	8.02662e+06	8.59342e+06	9.30726e+06	8.89802e+06	1.31508e+07	6.85228e+06	7.59743e+06	8.54485e+06	C04230	-	-	-	-	-
MEDN2352	LPE(0:0/14:0)	LPE(0:0/14:0)	GP	甘油磷脂类	LPE	溶血磷脂酰乙醇胺	424.2	425.254	[M-H]-	C19H40NO7P	2	141854	127006	148183	241361	224502	228927	165766	173915	176511	148200	157473	145993	C04438	HMDB0011470	53480919	-	-	-
MEDP2789	LPE(0:0/15:0)	LPE(0:0/15:0)	GP	甘油磷脂类	LPE	溶血磷脂酰乙醇胺	440.3	439.27	[M+H]+	C20H42NO7P	1	2.08795e+06	1.98496e+06	2.11162e+06	2.11862e+06	2.12952e+06	1.68069e+06	1.53851e+06	1.63696e+06	1.78475e+06	1.61233e+06	1.84346e+06	1.73675e+06	-	-	53480921	-	-	-
MEDN1285	LPE(0:0/16:0)	LPE(0:0/16:0)	GP	甘油磷脂类	LPE	溶血磷脂酰乙醇胺	452.3	453.286	[M-H]-	C21H44NO7P	1	3.08832e+06	3.23532e+06	3.32345e+06	5.50623e+06	6.0427e+06	5.59578e+06	3.27703e+06	3.60805e+06	3.71981e+06	3.36587e+06	3.5494e+06	3.44638e+06	-	-	53480922	-	-	-
MEDN1287	LPE(0:0/16:1)	LPE(0:0/16:1)	GP	甘油磷脂类	LPE	溶血磷脂酰乙醇胺	450.3	451.27	[M-H]-	C21H42NO7P	1	486816	425920	521301	908941	771612	834226	565979	591690	550677	552015	524683	572328	-	-	-	-	-	-
MEDN1279	LPE(0:0/18:0)	LPE(0:0/18:0)	GP	甘油磷脂类	LPE	溶血磷脂酰乙醇胺	480.3	481.317	[M-H]-	C23H48NO7P	1	1.81496e+06	2.29978e+06	2.04637e+06	3.14724e+06	2.91667e+06	2.72418e+06	2.26091e+06	2.6072e+06	2.66567e+06	1.96906e+06	2.13188e+06	2.15242e+06	-	-	53480667	-	-	-
MEDN2366	LPE(0:0/18:1)	LPE(0:0/18:1)	GP	甘油磷脂类	LPE	溶血磷脂酰乙醇胺	478.3	479.301	[M-H]-	C23H46NO7P	2	2.32326e+07	2.15293e+07	2.36491e+07	2.83966e+07	2.98397e+07	2.6926e+07	2.2909e+07	2.44231e+07	2.58745e+07	1.95159e+07	2.00273e+07	2.16947e+07	-	HMDB0011476	53480925	-	76088	-
MEDN1282	LPE(0:0/18:2)	LPE(0:0/18:2)	GP	甘油磷脂类	LPE	溶血磷脂酰乙醇胺	476.3	477.286	[M-H]-	C23H44NO7P	1	4.99649e+06	4.76939e+06	5.78021e+06	4.84527e+06	5.16741e+06	5.14598e+06	4.02102e+06	3.95769e+06	4.91024e+06	3.76068e+06	4.00274e+06	4.11635e+06	-	-	-	-	-	-
MEDN1283	LPE(0:0/18:3)	LPE(0:0/18:3)	GP	甘油磷脂类	LPE	溶血磷脂酰乙醇胺	474.3	475.27	[M-H]-	C23H42NO7P	1	637176	557454	620452	684552	643477	634028	499368	517989	573682	501330	500104	485810	-	-	53480928	-	-	-
MEDN2367	LPE(0:0/20:1)	LPE(0:0/20:1)	GP	甘油磷脂类	LPE	溶血磷脂酰乙醇胺	506.3	507.332	[M-H]-	C25H50NO7P	2	181998	172024	200914	264397	253223	215334	179506	198065	206867	186186	183919	188181	-	HMDB0011482	53480931	-	-	-
MEDN1271	LPE(0:0/20:2)	LPE(0:0/20:2)	GP	甘油磷脂类	LPE	溶血磷脂酰乙醇胺	504.3	505.317	[M-H]-	C25H48NO7P	1	483232	482811	522334	470418	515517	435810	386788	471145	424783	406151	345593	399927	-	-	-	-	-	-
MEDN1273	LPE(0:0/20:3)	LPE(0:0/20:3)	GP	甘油磷脂类	LPE	溶血磷脂酰乙醇胺	502.3	503.301	[M-H]-	C25H46NO7P	2	6.01957e+06	5.47567e+06	6.03393e+06	8.02784e+06	9.06872e+06	7.52388e+06	5.40185e+06	6.34832e+06	6.52444e+06	5.50626e+06	6.1055e+06	5.80671e+06	-	-	-	-	-	-
MEDN1277	LPE(0:0/20:5)	LPE(0:0/20:5)	GP	甘油磷脂类	LPE	溶血磷脂酰乙醇胺	498.3	499.27	[M-H]-	C25H42NO7P	1	4.23391e+06	4.80442e+06	4.88992e+06	5.8498e+06	7.15849e+06	6.13985e+06	4.2149e+06	5.41454e+06	4.54191e+06	4.59463e+06	4.23829e+06	4.59588e+06	-	-	-	-	-	-
MEDN1267	LPE(0:0/22:5)	LPE(0:0/22:5)	GP	甘油磷脂类	LPE	溶血磷脂酰乙醇胺	526.3	527.301	[M-H]-	C27H46NO7P	1	72001.1	59340.5	72119.7	51241.9	54755.2	55734.2	43461.6	50829	51343.4	47077.3	48155.8	50125.5	-	-	-	-	-	-
MEDN0368	LPE(14:0/0:0)	LPE(14:0/0:0)	GP	甘油磷脂类	LPE	溶血磷脂酰乙醇胺	424.2	425.254	[M-H]-	C19H40NO7P	1	160540	152374	152768	271452	267586	260638	166150	191676	194500	165918	190274	170493	-	HMDB0011500	9547070	-	84299	-
MEDN0366	LPE(16:0/0:0)	LPE(16:0/0:0)	GP	甘油磷脂类	LPE	溶血磷脂酰乙醇胺	452.3	453.286	[M-H]-	C21H44NO7P	1	2.73387e+06	2.81176e+06	2.86093e+06	5.67531e+06	5.75249e+06	5.15729e+06	3.16276e+06	3.41609e+06	3.54028e+06	3.36755e+06	3.50684e+06	3.45414e+06	-	-	-	-	-	-
MEDN2364	LPE(16:1/0:0)	LPE(16:1/0:0)	GP	甘油磷脂类	LPE	溶血磷脂酰乙醇胺	450.3	451.27	[M-H]-	C21H42NO7P	1	1.86006e+06	1.89316e+06	2.0247e+06	3.16019e+06	2.96767e+06	3.20489e+06	1.81717e+06	2.18122e+06	2.10247e+06	1.81256e+06	1.80172e+06	1.99213e+06	-	HMDB0011474	53480923	-	-	-
MEDN2362	LPE(17:0/0:0)	LPE(17:0/0:0)	GP	甘油磷脂类	LPE	溶血磷脂酰乙醇胺	466.3	467.301	[M-H]-	C22H46NO7P	2	2.79836e+06	2.82047e+06	2.84736e+06	3.13412e+06	3.06215e+06	3.05062e+06	2.31528e+06	2.45988e+06	2.47741e+06	2.05833e+06	2.13443e+06	2.33455e+06	-	-	52925149	-	-	-
MEDN2365	LPE(17:1/0:0)	LPE(17:1/0:0)	GP	甘油磷脂类	LPE	溶血磷脂酰乙醇胺	464.3	465.286	[M-H]-	C22H44NO7P	1	3.19165e+06	3.1158e+06	3.38496e+06	3.92275e+06	3.63339e+06	3.60813e+06	2.7552e+06	3.00839e+06	3.03316e+06	2.7769e+06	2.96674e+06	2.91917e+06	-	-	42607464	-	-	-
MEDN0364	LPE(18:0/0:0)	LPE(18:0/0:0)	GP	甘油磷脂类	LPE	溶血磷脂酰乙醇胺	480.3	481.317	[M-H]-	C23H48NO7P	1	1.42794e+06	1.58313e+06	1.51306e+06	2.36737e+06	2.40856e+06	2.4162e+06	1.85128e+06	1.96423e+06	2.15455e+06	1.3665e+06	1.64216e+06	1.77415e+06	-	HMDB0011130	9547068	-	75036	-
MEDN0362	LPE(18:1/0:0)	LPE(18:1/0:0)	GP	甘油磷脂类	LPE	溶血磷脂酰乙醇胺	478.3	479.301	[M-H]-	C23H46NO7P	1	2.28435e+07	2.05115e+07	2.34059e+07	28791084	2.77392e+07	2.8977e+07	2.26243e+07	2.56861e+07	2.48294e+07	1.94702e+07	2.12636e+07	2.16823e+07	-	HMDB0011506	53480949	-	74971	-
MEDN2369	LPE(18:2/0:0)	LPE(18:2/0:0)	GP	甘油磷脂类	LPE	溶血磷脂酰乙醇胺	476.3	477.286	[M-H]-	C23H44NO7P	1	1.38611e+06	1.15891e+06	1.58278e+06	1.39706e+06	1.62109e+06	1.24443e+06	1.16513e+06	1.22912e+06	1.20849e+06	1.0247e+06	1.18733e+06	1.13149e+06	-	HMDB0011507	52925130	85046-18-0	83058	-
MEDN1284	LPE(18:3/0:0)	LPE(18:3/0:0)	GP	甘油磷脂类	LPE	溶血磷脂酰乙醇胺	474.3	475.27	[M-H]-	C23H42NO7P	1	579092	580289	610801	714198	624825	608802	501303	544476	560570	467899	484294	512107	-	-	-	-	-	-
MEDN2368	LPE(20:1/0:0)	LPE(20:1/0:0)	GP	甘油磷脂类	LPE	溶血磷脂酰乙醇胺	506.3	507.332	[M-H]-	C25H50NO7P	2	222645	201548	214507	294810	313188	283673	204682	230234	259160	215358	231038	213983	-	HMDB0011512	52925139	-	-	-
MEDN1272	LPE(20:2/0:0)	LPE(20:2/0:0)	GP	甘油磷脂类	LPE	溶血磷脂酰乙醇胺	504.3	505.317	[M-H]-	C25H48NO7P	1	2.74358e+06	2.34261e+06	2.50541e+06	2.13268e+06	2.15282e+06	1.93232e+06	1.84386e+06	1.93685e+06	1.95555e+06	1.68494e+06	1.80472e+06	1.98059e+06	-	-	-	-	-	-
MEDN1274	LPE(20:3/0:0)	LPE(20:3/0:0)	GP	甘油磷脂类	LPE	溶血磷脂酰乙醇胺	502.3	503.301	[M-H]-	C25H46NO7P	1	5.27155e+06	5.48919e+06	5.42772e+06	7.9688e+06	7.92471e+06	6.85634e+06	5.2836e+06	5.81716e+06	6.15916e+06	5.23984e+06	5.41147e+06	5.33156e+06	-	-	-	-	-	-
MEDN1276	LPE(20:4/0:0)	LPE(20:4/0:0)	GP	甘油磷脂类	LPE	溶血磷脂酰乙醇胺	500.3	501.286	[M-H]-	C25H44NO7P	1	4.97185e+06	4.92805e+06	5.75212e+06	5.43176e+06	6.56335e+06	5.52394e+06	3.10347e+06	4.57989e+06	5.31791e+06	4.10933e+06	4.62668e+06	4.39337e+06	-	-	-	-	-	-
MEDN1278	LPE(20:5/0:0)	LPE(20:5/0:0)	GP	甘油磷脂类	LPE	溶血磷脂酰乙醇胺	498.3	499.27	[M-H]-	C25H42NO7P	1	4.19651e+06	4.69861e+06	4.64521e+06	6.08021e+06	7.34322e+06	5.93929e+06	4.54471e+06	4.70941e+06	4.4173e+06	4.22202e+06	4.42753e+06	4.52732e+06	-	-	-	-	-	-
MEDN2371	LPE(22:3/0:0)	LPE(22:3/0:0)	GP	甘油磷脂类	LPE	溶血磷脂酰乙醇胺	530.3	531.332	[M-H]-	C27H50NO7P	2	12626.1	7266.1	7864.85	8958.41	9889.77	8284.48	2742.01	5153.86	6454.82	7269.92	9545.67	9678.11	-	-	-	-	-	-
MEDN1265	LPE(22:4/0:0)	LPE(22:4/0:0)	GP	甘油磷脂类	LPE	溶血磷脂酰乙醇胺	528.3	529.317	[M-H]-	C27H48NO7P	1	51433.3	62140.4	53210.6	39133.9	43264.2	35776.7	34297.4	29593	34358.4	35684	37123.3	37549.4	-	-	-	-	-	-
MEDN1268	LPE(22:5/0:0)	LPE(22:5/0:0)	GP	甘油磷脂类	LPE	溶血磷脂酰乙醇胺	526.3	527.301	[M-H]-	C27H46NO7P	1	59931.6	59941.1	62130.2	47134.7	52788.2	50434.6	31297.4	40931.9	39175.1	39750.3	43579	36805.3	-	-	-	-	-	-
MEDP2748	LPE(O-17:1)	LPE(O-17:1)	GP	甘油磷脂类	LPE	溶血磷脂酰乙醇胺	452.3	451.306	[M+H]+	C22H46NO6P	2	553170	587899	608770	716706	488465	590400	528683	520354	375444	469099	512878	488075	-	-	164487190	-	-	-
MEDN2286	LPE(O-18:1/0:0)	LPE(O-18:1/0:0)	GP	甘油磷脂类	LPE	溶血磷脂酰乙醇胺	464.3	465.322	[M-H]-	C23H48NO6P	2	768018	831217	868867	1.12504e+06	1.01135e+06	1.07135e+06	890212	945631	1.05848e+06	738615	812464	830584	-	-	42607468	-	-	-
MEDN2284	LPE(O-18:2)	LPE(O-18:2)	GP	甘油磷脂类	LPE	溶血磷脂酰乙醇胺	462.3	463.306	[M-H]-	C23H46NO6P	2	33780.4	34647.4	45671.3	46107.2	40057.8	42483	31499.8	36562.1	42833.7	32937.5	27755.7	32085.6	-	-	164230329	-	-	-
MEDP2849	LPE(P-16:0)	溶血磷脂酰乙醇胺_LPE(P-16:0)	GP	甘油磷脂类	LPE-P	溶血磷脂酰乙醇胺(烯醚键)	438.3	437.291	[M+H]+	C21H44NO6P	2	23142.6	30572.1	48151.1	39942	45428	33603.3	48190.6	43980.2	43423.4	39362.2	33548.6	34862.7	-	HMDB0011152	42607469	174062-72-7	-	-
MEDP2850	LPE(P-17:0)	溶血磷脂酰乙醇胺_LPE(P-17:0)	GP	甘油磷脂类	LPE-P	溶血磷脂酰乙醇胺(烯醚键)	452.3	451.306	[M+H]+	C22H46NO6P	2	656869	663175	780791	721710	741146	619550	561043	579180	613709	503087	613077	550603	-	-	-	-	-	-
MEDP2851	LPE(P-18:0)	溶血磷脂酰乙醇胺_LPE(P-18:0)	GP	甘油磷脂类	LPE-P	溶血磷脂酰乙醇胺(烯醚键)	466.3	465.322	[M+H]+	C23H48NO6P	2	4.50024e+06	5.4717e+06	5.49414e+06	6.36847e+06	6.0376e+06	6.19394e+06	5.59571e+06	5.71253e+06	6.5236e+06	4.46502e+06	5.0698e+06	5.2067e+06	-	HMDB0240598	42607470	174062-73-8	-	-
MEDP2856	LPE(P-18:1)	溶血磷脂酰乙醇胺_LPE(P-18:1)	GP	甘油磷脂类	LPE-P	溶血磷脂酰乙醇胺(烯醚键)	464.3	463.306	[M+H]+	C23H46NO6P	2	163216	185915	200205	223784	191089	200551	191560	205826	180242	178103	176717	160696	-	-	-	-	-	-
MEDN2372	LPE0:0/(20:4)	LPE0:0/(20:4)	GP	甘油磷脂类	LPE	溶血磷脂酰乙醇胺	500.3	501.286	[M-H]-	C25H44NO7P	1	4.76629e+06	4.93395e+06	4.51031e+06	8.04116e+06	7.64251e+06	6.3795e+06	4.90217e+06	5.37829e+06	6.34515e+06	5.05894e+06	5.22514e+06	4.96681e+06	-	HMDB0011487	53480936	-	72741	-
MEDN2403	LPG(17:0)	溶血磷脂酰甘油_LPG(17:0)	GP	甘油磷脂类	LPG	溶血磷脂酰甘油	497.3	498.296	[M-H]-	C23H47O9P	2	28314.1	25080.7	23805.4	26691.3	12234	12538.6	12603.4	41804.7	33421.3	21630.9	21171.4	21157	-	-	52927456	-	-	-
MEDN2405	LPG(19:0)	溶血磷脂酰甘油_LPG(19:0)	GP	甘油磷脂类	LPG	溶血磷脂酰甘油	525.3	526.327	[M-H]-	C25H51O9P	2	100557	120667	101787	122421	105706	108783	125849	107351	143874	97950.5	97193.7	98565.2	-	-	52927454	-	-	-
MEDN2385	LPS(20:0)	溶血磷脂酰丝氨酸_LPS(20:0)	GP	甘油磷脂类	LPS	溶血磷脂酰丝氨酸	552.3	553.338	[M-H]-	C26H52NO9P	2	12585	11973.1	13166.9	24042.3	25290.2	24413.5	18415.5	18268.5	15930.6	14418.2	17400	13315.2	-	-	52926280	-	-	-
MEDN0229*056	Lactose	乳糖	Carbohydrates and Its metabolites	碳水化合物及其代谢物	Sugars	糖类	341.1	342.116	[M-H]-	C12H22O11	2	7.94948e+06	8.8973e+06	12640618	1.747e+07	1.09103e+07	1.46579e+07	1.32386e+07	1.69903e+07	1.64388e+07	1.55069e+07	1.2023e+07	1.27607e+07	C00243	HMDB0000186	84571	63-42-3	36219	267
MEDN0230*056	Lactulose	乳果糖	Carbohydrates and Its metabolites	碳水化合物及其代谢物	Sugars	糖类	341.1	342.116	[M-H]-	C12H22O11	2	7.94948e+06	8.8973e+06	12640618	1.747e+07	1.09103e+07	1.46579e+07	1.32386e+07	1.69903e+07	1.64388e+07	1.55069e+07	1.2023e+07	1.27607e+07	C07064	HMDB0000740	11333	4618-18-2	6359	916
MEDP1776	Leu-Ala	L-亮氨酸-L-丙氨酸	Amino acid and Its metabolites	氨基酸及其代谢物	Small Peptide	小肽	203.1	202.132	[M+H]+	C9H18N2O3	2	163256	151660	342653	217311	120917	193132	399249	330820	145315	159582	168790	249195	D78456	HMDB0028922	81721	7298-84-2	-	-
MEDP1668	Leu-Ala-Val	亮氨酸-丙氨酸-缬氨酸	Amino acid and Its metabolites	氨基酸及其代谢物	Small Peptide	小肽	302.2	301.2	[M+H]+	C14H27N3O4	2	52687.4	41410.7	51296.9	52743.7	47221.9	41394.6	92501.7	63636.2	64600.8	47059.2	51702.7	52732.4	-	-	-	-	-	-
MEDP2504*145	Leu-Asn	亮氨酸-天冬酰胺	Amino acid and Its metabolites	氨基酸及其代谢物	Small Peptide	小肽	246.1	245.137	[M+H]+	C10H19N3O4	2	36636.6	31912.9	57760.8	61265.1	54408.7	28410	47217.6	22545.5	20094.2	40096.5	64938.1	38887.1	-	-	7016078	14608-81-2	-	-
MEDP2572	Leu-Asp	L-亮氨酸-L-天冬氨酸	Amino acid and Its metabolites	氨基酸及其代谢物	Small Peptide	小肽	247.1	246.121	[M+H]+	C10H18N2O5	1	51102	69990.7	77618.1	64004.5	86491.1	77228.4	93032.8	81363.8	50818.8	54355	97908.2	55191.7	-	-	7019087	32949-40-9	-	-
MEDP2393*151	Leu-Glu	L-亮氨酸-L-谷氨酸	Amino acid and Its metabolites	氨基酸及其代谢物	Small Peptide	小肽	261.1	260.137	[M+H]+	C11H20N2O5	2	93951.2	74178.7	162660	110507	98400.7	115689	151467	161763	124538	101628	121395	112116	-	-	7009630	16364-31-1	-	-
MEDP2307*144	Leu-Leu	L-亮氨酰-L-亮氨酸	Amino acid and Its metabolites	氨基酸及其代谢物	Small Peptide	小肽	245.2	244.179	[M+H]+	C12H24N2O3	2	218940	186920	404995	291984	201941	238461	314527	387055	289946	234829	282190	266174	C11332	HMDB0028933	76807	3303-31-9	73531	-
MEDP1672	Leu-Leu-Glu	亮氨酸-亮氨酸-谷氨酸	Amino acid and Its metabolites	氨基酸及其代谢物	Small Peptide	小肽	374.2	373.221	[M+H]+	C17H31N3O6	2	46388.2	52502.4	68504.8	65263.8	42066	43852.5	67185.1	58387.9	59580.9	40354.5	47149	49925.3	-	-	484684	20274-83-3	-	-
MEDP1675	Leu-Leu-Gly	亮氨酸-亮氨酸-甘氨酸	Amino acid and Its metabolites	氨基酸及其代谢物	Small Peptide	小肽	302.2	301.2	[M+H]+	C14H27N3O4	2	30665.5	22276.1	23133.2	37636.5	33159.9	30497.2	56792	40098.7	40493.1	31878.8	35283	30302.1	-	-	7019089	4464-36-2	-	-
MEDP1683	Leu-Leu-Leu	亮氨酸-亮氨酸-亮氨酸	Amino acid and Its metabolites	氨基酸及其代谢物	Small Peptide	小肽	358.3	357.263	[M+H]+	C18H35N3O4	2	34760.1	47150.8	22172	37782.7	50482.2	21950.3	39404.1	36567.6	87841.9	38712.7	39667.2	38095.6	-	-	82546	10329-75-6	-	-
MEDP2442	Leu-Met	亮氨酸-蛋氨酸	Amino acid and Its metabolites	氨基酸及其代谢物	Small Peptide	小肽	263.1	262.135	[M+H]+	C11H22N2O3S	2	38511	42836.3	56101.5	48183.4	28953.7	54446.7	76643.5	65996.2	37816.5	36207.5	42216.4	47432.5	-	-	7010529	36077-39-1	-	-
MEDP1780	Leu-Phe	L-亮氨酸-L-苯丙氨酸	Amino acid and Its metabolites	氨基酸及其代谢物	Small Peptide	小肽	279.2	278.163	[M+H]+	C15H22N2O3	1	34055.3	43773.5	102689	68971.3	42290.2	74706.4	133103	97356.6	52593.1	51343.3	49010.9	52456.4	D95550	HMDB0013243	6992310	3063/5/6	73585	-
MEDP2396*142	Leu-Thr	亮氨酸-苏氨酸	Amino acid and Its metabolites	氨基酸及其代谢物	Small Peptide	小肽	233.2	232.14	[M+H]+	C10H20N2O4	2	129464	120024	221191	187152	101481	157607	321899	319221	120799	154150	141138	147348	-	-	10353878	-	-	-
MEDP1506	Leu-Val	L-亮氨酰-L-缬氨酸	Amino acid and Its metabolites	氨基酸及其代谢物	Small Peptide	小肽	231	230.163	[M+H]+	C11H22N2O3	2	109759	113857	215531	144124	97751.5	167075	176789	221874	137475	154442	142380	147356	-	HMDB0028942	6993116	13588-95-9	-	-
MEDN2302	Licochalcone B	甘草查耳酮 B	Benzene and substituted derivatives	苯及其衍生物	Benzene and substituted derivatives	苯及其衍生物	285	286.084	[M-H]-	C16H14O5	2	1.4974e+06	1.42612e+06	1.47857e+06	1.47323e+06	1.55828e+06	1.36339e+06	1.39579e+06	1.53057e+06	1.55567e+06	1.2949e+06	1.3347e+06	1.40789e+06	-	HMDB0037320	5318999	58749-23-8	-	-
MEDP2806	Linoleamide	亚油酰胺	Alcohol and amines	醇、胺类	Amines	胺类	280.2	279.256	[M+H]+	C18H33NO	2	2.12356e+06	3.27567e+06	3.23866e+06	1.82122e+06	2.552e+06	1.92706e+06	1.54783e+06	942887	2.42808e+06	2.09214e+06	2.61061e+06	2.55346e+06	-	HMDB0062656	6435901	3999/1/7	82984	-
MEDP0890	Lumichrome	光色素	Heterocyclic compounds	杂环化合物	Heterocyclic compounds	杂环化合物	243.2	242.08	[M+H]+	C12H10N4O2	1	52517.2	52742.4	42611.8	62494.3	63192.9	60981.7	49945.5	58250.1	83080.2	62922.5	70528.8	62888.4	C01727	-	5326566	1086-80-2	-	-
MEDP2580*152	Lys-Asp	L-赖氨酸-L-天冬氨酸	Amino acid and Its metabolites	氨基酸及其代谢物	Small Peptide	小肽	262.1	261.132	[M+H]+	C10H19N3O5	2	35426.2	17083	27896.8	30082.7	16189.2	36746.3	37574.2	5541.03	8370.12	28318.6	20163.7	28919.6	-	HMDB0028947	6426943	20556-18-7	-	-
MEDN2107	Lys-Gly	L-赖氨酸-L-甘氨酸	Amino acid and Its metabolites	氨基酸及其代谢物	Small Peptide	小肽	202.1	203.128	[M-H]-	C8H17N3O3	2	136324	205854	163041	210663	178377	165802	165496	208327	116081	170034	155516	142989	-	HMDB0028951	7022320	7563/3/3	-	-
MEDP2371	Lys-Ile	赖氨酸-异亮氨酸	Amino acid and Its metabolites	氨基酸及其代谢物	Small Peptide	小肽	260.2	259.19	[M+H]+	C12H25N3O3	2	12724.4	22239	21735.3	16760.1	13741.5	20153.4	13872.2	11269.8	16058.3	18489.7	15390.4	13332.1	-	HMDB0028954	7010499	20556-13-2	-	-
MEDP2376	Lys-Leu	赖氨酸-亮氨酸	Amino acid and Its metabolites	氨基酸及其代谢物	Small Peptide	小肽	260.2	259.19	[M+H]+	C12H25N3O3	2	223238	217973	360251	283977	248508	294091	510678	522682	220780	440416	399144	226603	-	HMDB0028955	7016103	7369-79-1	-	-
MEDP2596	Lys-Phe	L-赖氨酸-L-苯丙氨酸	Amino acid and Its metabolites	氨基酸及其代谢物	Small Peptide	小肽	294.2	293.173	[M+H]+	C15H23N3O3	2	115716	109002	137567	129608	114713	122031	168897	152249	130050	104299	127704	144448	-	HMDB0015371	151410	6235-35-4	5296	-
MEDP2310	Lys-Pro	赖氨酸-脯氨酸	Amino acid and Its metabolites	氨基酸及其代谢物	Small Peptide	小肽	244.2	243.158	[M+H]+	C11H21N3O3	2	56677.9	41521.8	52171.3	36505.2	37261.2	39531.2	57651.9	36735.7	27636.8	42740.5	45502.8	44129.4	-	-	171204	52766-27-5	-	-
MEDP2318	Lys-Ser	赖氨酸-丝氨酸	Amino acid and Its metabolites	氨基酸及其代谢物	Small Peptide	小肽	234.1	233.137	[M+H]+	C9H19N3O4	2	100460	67628.5	112938	137844	138873	86092	91357.8	107300	107422	95137.3	90457.9	117221	-	-	151428	6665-19-6	-	-
MEDN2123	Lys-Thr	L-赖氨酸-L-苏氨酸	Amino acid and Its metabolites	氨基酸及其代谢物	Small Peptide	小肽	246.2	247.154	[M-H]-	C10H21N3O4	2	39131	5804.59	38845.7	43893.7	46251.4	38322.5	44363.2	42927.3	38748.5	40856.1	36384.7	48537.4	-	HMDB0028961	7010718	97791-84-9	-	-
MEDN1171	Lythramine	Lythramine	Alcohol and amines	醇、胺类	Polyamines	多胺	478.3	479.267	[M-H]-	C29H37NO5	2	12027.2	10846.4	12938.2	14688.3	21786.4	20176.1	11033.1	14655.1	16287.2	14660.6	10194.1	11478.1	C10604	-	442864	32420-56-7	-	-
MEDP2791	MG(0:0/20:4/0:0)	MG(0:0/20:4/0:0)	GL	甘油脂类	MG	单甘油酯	379.3	378.276	[M+H]+	C23H38O4	2	51733.5	69587	175593	101899	70742.8	83791.4	131887	149214	84250.6	58366.3	85674.3	99037.8	-	-	-	-	-	-
MEDP1453	MG(0:0/20:5/0:0)	MG(0:0/20:5/0:0)	GL	甘油脂类	MG	单甘油酯	377.3	376.261	[M+H]+	C23H36O4	2	245227	210212	421240	274999	186424	270838	355399	430511	261623	225038	286191	297011	-	-	-	-	-	-
MEDN2253	MG(15:0/0:0)	MG(15:0/0:0)	GL	甘油脂类	MG	单甘油酯	356.3	316.261	[M-H+CH3CN]-	C18H36O4	2	34402.8	41499.1	28783	92009.9	90378.6	84178.4	42264.7	52564.5	49489.9	62053.7	65217.6	66330.9	-	HMDB0011563	46879024	-	-	-
MEDP1097	MG(18:2/0:0/0:0)	MG(18:2/0:0/0:0)	GL	甘油脂类	MG	单甘油酯	355	354.277	[M+H]+	C21H38O4	2	60999	54838.8	69626.3	67289.9	68997.4	79267.7	87124.9	76773.6	62156.3	61567.5	83758	89513.5	-	-	5365676	3443-82-1	-	-
MEDP1455	MG(20:4/0:0/0:0)	MG(20:4/0:0/0:0)	GL	甘油脂类	MG	单甘油酯	379.3	378.276	[M+H]+	C23H38O4	1	58327.8	60594.2	156485	123261	73320.9	84520.4	122965	159573	91905.3	91858.9	124301	121224	-	-	-	-	-	-
MEDP1454	MG(20:5/0:0/0:0)	MG(20:5/0:0/0:0)	GL	甘油脂类	MG	单甘油酯	377.3	376.261	[M+H]+	C23H36O4	2	227855	212531	411606	263279	190300	253348	354115	403842	244494	230572	283194	273786	-	-	-	-	-	-
MEDN0233*056	Maltose	麦芽糖	Carbohydrates and Its metabolites	碳水化合物及其代谢物	Sugars	糖类	341.1	342.116	[M-H]-	C12H22O11	2	7.94948e+06	8.8973e+06	12640618	1.747e+07	1.09103e+07	1.46579e+07	1.32386e+07	1.69903e+07	1.64388e+07	1.55069e+07	1.2023e+07	1.27607e+07	C00208	HMDB0000163	10991489	69-79-4	47937	413
MEDN0234*060	Maltotriose	麦芽三糖	Carbohydrates and Its metabolites	碳水化合物及其代谢物	Sugars	糖类	503.2	504.169	[M-H]-	C18H32O16	2	8307.28	1471.04	28849	40574.9	8091.78	10813.7	19400.7	23685.6	12704.4	13446.7	16182.3	16639.4	C01835	HMDB0001262	439586	1109-28-0	140999	3585
MEDN0334*019	Mandelic Acid	扁桃酸	Organic acid And Its derivatives	有机酸及其衍生物	Organic acid And Its derivatives	有机酸及其衍生物	151	152.047	[M-H]-	C8H8O3	2	57941.7	41736.9	66407.6	50441.7	50747.6	71266	47222.8	77811.2	53535.5	56063.8	74301.8	71608.5	C01984	HMDB0000703	439616	90-64-2	32800	5671
MEDN0208	Melatonin	褪黑激素	Hormones and hormone related compounds	激素及激素相关物质	Hormones and hormone related compounds	激素及激素相关物质	231.1	232.121	[M-H]-	C13H16N2O2	2	33753.7	34302.7	49172.1	44478.9	55404.7	50625.9	48958.5	56290.9	59568.1	44404.8	48684.2	50119.7	C01598	HMDB0001389	896	73-31-4	16796	73
MEDP1990*165	Melibiose	蜜二糖	Carbohydrates and Its metabolites	碳水化合物及其代谢物	Sugars	糖类	343.1	342.116	[M+K]+	C12H22O11	2	85773.2	76866.1	100068	92984.9	156621	69517.4	149911	109415	86057.6	91608.3	128108	133728	C05402	HMDB0000048	440658	585-99-9	-	-
MEDP2604	Met-Arg	L-蛋氨酸-L-精氨酸	Amino acid and Its metabolites	氨基酸及其代谢物	Small Peptide	小肽	306.2	305.152	[M+H]+	C11H23N5O3S	2	15802.1	7251.14	8732.83	7566.39	5664.43	6022.82	10375	1082.87	6651.48	8542.84	11730.2	7808.08	-	-	25216498	60461-10-1	-	-
MEDP2598	Met-Phe	L-蛋氨酸-L-苯丙氨酸	Amino acid and Its metabolites	氨基酸及其代谢物	Small Peptide	小肽	297.1	296.119	[M+H]+	C14H20N2O3S	2	9468.28	9661.27	31059.6	16765.3	8329.64	16146.6	10498.5	25469.7	8702.09	13734	11563	13194.8	-	-	6992350	14492-14-9	-	-
MEDP2606	Met-Tyr	L-蛋氨酸-L-酪氨酸	Amino acid and Its metabolites	氨基酸及其代谢物	Small Peptide	小肽	313.1	312.114	[M+H]+	C14H20N2O4S	2	10878.1	14487.5	26164.4	10301	5725.56	13202.7	27422	27294.9	13841.1	15384.7	8683.32	8505.73	-	-	7009558	13589-04-3	-	-
MEDN0741	Methanesulfonic acid	甲磺酸	Organic acid And Its derivatives	有机酸及其衍生物	Sulfonic acids	磺酸类化合物	95	95.9881	[M-H]-	CH4O3S	1	1.50058e+06	747636	1.55795e+06	1.34139e+06	973534	1.29185e+06	1.24589e+06	951493	1.39919e+06	1.02223e+06	740169	1.37332e+06	C11145	-	6395	75-75-2	-	-
MEDP1178	Methenamine	乌洛托品	Alcohol and amines	醇、胺类	Amines	胺类	141.1	140.106	[M+H]+	C6H12N4	2	1.99617e+06	2.06291e+06	1.91759e+06	1.9233e+06	2.11539e+06	1.95075e+06	1.94595e+06	1.92111e+06	1.81313e+06	2.0211e+06	2.0174e+06	1.90424e+06	D00393	HMDB0029598	4101	100-97-0	6824	-
MEDN0051	Methionine Sulfoxide	蛋氨酸亚砜	Amino acid and Its metabolites	氨基酸及其代谢物	Amino acid derivatives	氨基酸衍生物	164	165.046	[M-H]-	C5H11NO3S	2	4717.23	1370.71	645.559	4597.74	2858.26	1752.74	9	9	9	2175.56	5248.01	3122.05	C02989	HMDB0002005	847	62697-73-8	17016	6428
MEDP1098	Methoxyindoleacetic Acid	甲氧基吲哚乙酸	Heterocyclic compounds	杂环化合物	Indole and Its derivatives	吲哚及其衍生物	206.1	205.074	[M+H]+	C11H11NO3	2	241616	238887	238162	210259	229244	238329	232693	200094	224034	229778	216668	214259	C05660	HMDB0004096	18986	3471-31-6	28281	7016
MEDP0277	Methyl Indole-3-Acetate	吲哚-3-乙酸甲酯	Heterocyclic compounds	杂环化合物	Indole and Its derivatives	吲哚及其衍生物	190.1	189.079	[M+H]+	C11H11NO2	1	84545.6	76574.6	121184	71026.5	94503.8	79374	87194.7	87691.9	84933	78121.4	88383.7	83025	C20635	HMDB0029738	74706	1912-33-0	72782	-
MEDP0685	Methylcysteine	S-甲基-L-半胱氨酸	Amino acid and Its metabolites	氨基酸及其代谢物	Amino acids	氨基酸	136.2	135.035	[M+H]+	C4H9NO2S	2	2.61373e+06	2.99508e+06	4.8672e+06	6.87201e+06	5.39738e+06	5.35661e+06	4.54752e+06	5.37196e+06	4.5952e+06	3.30636e+06	3.31992e+06	3.74468e+06	C22040	HMDB0002108	24417	1187-84-4	45658	6490
MEDN0335*066	Methylmalonic Acid	甲基丙二酸	Organic acid And Its derivatives	有机酸及其衍生物	Organic acid And Its derivatives	有机酸及其衍生物	117	118.027	[M-H]-	C4H6O4	1	308761	267233	300231	389940	299981	294210	312600	317178	320597	278898	312846	277704	C02170	HMDB0000202	487	516-05-2	30860	3712
MEDP0700	Methyl beta-D-galactopyranoside	甲基β-D-吡喃半乳糖苷	Carbohydrates and Its metabolites	碳水化合物及其代谢物	Sugar derivatives	糖衍生物	195.2	194.079	[M+H]+	C7H14O6	1	707638	770052	380888	703356	816709	667147	503556	902536	601470	743933	770120	601255	C03619	-	94214	1824-94-8	-	-
MEDN1562	Monobutyl phthalate	邻苯二甲酸单丁酯	Aldehyde,Ketones,Esters	醛、酮、酯类	Esters	酯类	221.1	222.089	[M-H]-	C12H14O4	1	340156	381432	361532	340176	336012	384013	376399	389988	391392	356622	409617	378866	D70341	HMDB0013247	8575	131-70-4	-	-
MEDN1183	Multifidol	2-甲基-1-（2,4,6-三羟基苯基）丁烷-1-酮	Benzene and substituted derivatives	苯及其衍生物	Phenolics	苯酚类	209.1	210.089	[M-H]-	C11H14O4	2	410035	346291	303257	293788	277497	312871	378277	300794	350543	362190	341922	357801	C10709	-	12892	125074-06-8	-	-
MEDP1360	Mycosporine-glycine	霉菌素甘氨酸	Amino acid and Its metabolites	氨基酸及其代谢物	Amino acid derivatives	氨基酸衍生物	246.1	245.09	[M+H]+	C10H15NO6	1	31214.5	7973.02	24614.6	17592.5	16391.9	34025.4	18009	27364.9	16145.1	10036.8	26236.1	22520	-	-	14444486	65318-21-0	-	-
MEDP0135*128	Myoinositol	肌醇	Carbohydrates and Its metabolites	碳水化合物及其代谢物	Sugar alcohols	糖醇	181.1	180.063	[M+H]+	C6H12O6	1	8.52963e+06	7.71847e+06	8.59464e+06	8.78491e+06	7.1933e+06	7.89871e+06	8.88405e+06	7.14346e+06	1.02478e+07	9.46718e+06	8.99948e+06	1.01257e+07	C00137	HMDB0000211	892	87-89-8	17268	5221
MEDP0326	N'-Formylkynurenine	N’-甲酰基犬尿氨酸	Amino acid and Its metabolites	氨基酸及其代谢物	Amino acid derivatives	氨基酸衍生物	237.1	236.08	[M+H]+	C11H12N2O4	1	43813.6	35079.3	79448.6	91548.8	83262.8	82830.4	73402	60457.5	41253.3	42428.1	78082.8	56898.5	C02406	HMDB0001200	910	1022-31-7	18377	-
MEDP2143	N,N-Bis(2-hydroxyethyl)dodecanamide	二乙醇胺月桂酸	FA	脂肪酰类	Others	其他	288.3	287.246	[M+H]+	C16H33NO3	1	110496	99983.7	89955.2	78716	99935.9	80507.2	107119	93954.8	106443	112995	120459	127490	C06179	HMDB0032358	8430	120-40-1	-	-
MEDP1663	N,N-Dimethylarginine	N，N-二甲基精氨酸	Amino acid and Its metabolites	氨基酸及其代谢物	Amino acid derivatives	氨基酸衍生物	203.1	202.143	[M+H]+	C8H18N4O2	2	48396.6	27076.1	21178.4	23934.2	21432.3	18176.5	20772.7	18537.7	20499.6	20534.9	23014.8	26273.7	C03626	HMDB0001539	123831	30315-93-6	17929	6309
MEDP1052	N,N-diacetyl-O-methylhydroxylamine	N,N-二乙酰基-O-甲基羟胺	Alcohol and amines	醇、胺类	Polyamines	多胺	132.1	131.058	[M+H]+	C5H9NO3	2	1.0733e+06	910230	1.13511e+06	1.01257e+06	1.03891e+06	1.18571e+06	950056	1.08954e+06	1.13061e+06	962409	877489	992568	D91454	-	538412	128459-09-6	-	-
MEDN1125	N,N′-dicyclohexylcarbodiimide	N,N‘-二环己基碳二亚胺	Alcohol and amines	醇、胺类	Polyamines	多胺	205.2	206.178	[M-H]-	C13H22N2	2	3.65167e+06	3.3839e+06	2.93469e+06	3.08616e+06	3.9721e+06	3.52751e+06	3.28394e+06	4.20175e+06	3.7505e+06	8.52471e+06	9.31675e+06	9.59243e+06	C93487	-	10868	538-75-0	-	-
MEDP2758	N-(2-Hydroxyethyl)pentadecanamide	十五酰基乙醇酰胺	FA	脂肪酰类	Others	其他	286.3	285.267	[M+H]+	C17H35NO2	2	126923	175094	117219	126153	134734	116034	118365	110493	154032	258947	263758	253770	-	-	14455157	53832-58-9	-	-
MEDP2412	N-(2-hydroxyethyl)-3-pyridinecarboxamide	N-(2-羟乙基)-3-吡啶甲酰胺	Heterocyclic compounds	杂环化合物	Heterocyclic compounds	杂环化合物	167.1	166.074	[M+H]+	C8H10N2O2	2	535660	439343	493938	475686	522293	375118	522641	448755	439509	432176	440209	446446	-	-	72663	6265-73-2	-	-
MEDP1040	N-(2-hydroxyethyl)stearamide	硬脂酰乙醇酰胺	Alcohol and amines	醇、胺类	Amines	胺类	328.3	327.314	[M+H]+	C20H41NO2	1	17156.1	36248.8	24580.2	30566.4	32238.9	34523.1	24513.2	22930.6	42770.6	15409.1	28992.5	27844.1	-	-	27902	111-57-9	-	-
MEDP1962	N-(3-Indolylacetyl)-L-alanine	N-(3-吲哚乙酰基)-L-丙氨酸	Amino acid and Its metabolites	氨基酸及其代谢物	Amino acid derivatives	氨基酸衍生物	247.1	246.1	[M+H]+	C13H14N2O3	2	39646.1	38565	47888.5	39990	35692.1	35670.8	39691.6	33929.4	28265.1	34490.2	32554.8	44344.4	-	-	644225	57105-39-2	-	-
MEDP2227	N-3-oxooctanoyl-L-homoserine-lactone	N-3-氧代辛酰基-L-高丝氨酸内酯	Amino acid and Its metabolites	氨基酸及其代谢物	Amino acid derivatives	氨基酸衍生物	242.1	241.131	[M+H]+	C12H19NO4	2	65590.4	70410	70797.1	69096.9	66186.5	65674.4	65398.6	80926.9	63887.6	47248.1	63894.4	48585.4	C11841	-	127293	147795-39-9	-	-
MEDP2047	N-Acetyl-Asp-Glu	N-乙酰天冬氨酰谷氨酸	Amino acid and Its metabolites	氨基酸及其代谢物	Small Peptide	小肽	305.1	304.091	[M+H]+	C11H16N2O8	2	29603.4	15919.2	20481.1	26267	31016.6	21295.2	18577	16073.6	11893.8	15537.2	16237.9	26386.4	C12270	HMDB0001067	188803	3106-85-2	95120	-
MEDN0235	N-Acetyl-D-Glucosamine	N-乙酰氨基葡萄糖	Carbohydrates and Its metabolites	碳水化合物及其代谢物	Sugar derivatives	糖衍生物	220.1	221.09	[M-H]-	C8H15NO6	2	114315	106514	101779	130039	145005	154760	137065	116890	142830	137694	117616	117002	C00140	HMDB0000215	439174	7512-17-6	506227	3356
MEDN2002	N-Acetyl-L-Glutamic Acid	N-乙酰-L-谷氨酸	Amino acid and Its metabolites	氨基酸及其代谢物	Amino acid derivatives	氨基酸衍生物	188.1	189.064	[M-H]-	C7H11NO5	2	5682.19	11934.2	9178.95	9806.66	10043.8	12536	8603.11	13440.3	7792.02	10184.1	14828.2	5875.49	C00624	HMDB0001138	70914	1188-37-0	17533	-
MEDP0611	N-Acetyl-L-Histidine	N-乙酰-L-组氨酸	Amino acid and Its metabolites	氨基酸及其代谢物	Amino acid derivatives	氨基酸衍生物	198.1	197.08	[M+H]+	C8H11N3O3	1	272336	226440	295077	265448	323809	353216	245641	247630	284537	303797	298200	256243	C02997	HMDB0032055	273260	2497/2/1	16437	-
MEDP0066	N-Acetyl-L-Tyrosine	N-乙酰-L-酪氨酸	Amino acid and Its metabolites	氨基酸及其代谢物	Amino acid derivatives	氨基酸衍生物	224.1	223.084	[M+H]+	C11H13NO4	1	194086	127860	199591	277275	248146	158044	225358	157075	258377	206379	192158	168878	C01657	HMDB0000866	68310	537-55-3	21563	-
MEDP1916	N-Acetyl-L-phenylalanine	N-乙酰苯丙氨酸	Amino acid and Its metabolites	氨基酸及其代谢物	Amino acid derivatives	氨基酸衍生物	208.1	207.09	[M+H]+	C11H13NO3	1	635280	577338	629811	582840	564529	601421	633557	571722	604036	614869	595616	542495	C03519	HMDB0000512	74839	2018-61-3	16259	5498
MEDP0064	N-Acetylcysteine	N-乙酰半胱氨酸	Amino acid and Its metabolites	氨基酸及其代谢物	Amino acid derivatives	氨基酸衍生物	164	163.03	[M+H]+	C5H9NO3S	1	282490	215252	296890	237689	318534	273607	252813	256179	281166	332931	330089	231197	C06809	HMDB0001890	12035	616-91-1	28939	784
MEDN0506	N-Acetylglucosamine 1-Phosphate	N-乙酰葡萄糖胺 1-磷酸	Carbohydrates and Its metabolites	碳水化合物及其代谢物	Phosphate sugars	磷酸糖	300	301.056	[M-H]-	C8H16NO9P	2	43842.1	79693.7	85722.1	111166	136915	88954.4	126009	88179.5	82841.9	63622.9	78718.4	83889.7	C04256	HMDB0001367	440272	6866-69-9	7125	6194
MEDP0373	N-Acetylglycine	N-乙酰基甘氨酸	Amino acid and Its metabolites	氨基酸及其代谢物	Amino acid derivatives	氨基酸衍生物	118	117.043	[M+H]+	C4H7NO3	2	9.4234e+06	9.24755e+06	9.56856e+06	9.25064e+06	1.02576e+07	1.06969e+07	9.20403e+06	1.0133e+07	1.03928e+07	9.81464e+06	9.29119e+06	1.05902e+07	-	HMDB0000532	10972	543-24-8	40410	5517
MEDP0089	N-Acetylhistamine	乙酰基组胺	Alcohol and amines	醇、胺类	Amines	胺类	154.1	153.09	[M+H]+	C7H11N3O	1	47428.8	46602.5	38549.3	37836	48882.8	22454.3	19556	32617.6	32719.3	52487.9	31836.2	19019.2	C05135	HMDB0013253	69602	673-49-4	28483	-
MEDN0058	N-Acetylneuraminic Acid(SA)	N-乙酰神经氨酸	Amino acid and Its metabolites	氨基酸及其代谢物	Amino acid derivatives	氨基酸衍生物	308.1	309.106	[M-H]-	C11H19NO9	1	147941	123925	136849	90306.4	122023	151668	151582	132451	135197	110988	119434	115704	C19910	HMDB0000230	445063	131-48-6	45744	3321
MEDN0839	N-Alpha-Acetyl-L-Asparagine	N-α-乙酰基-L-天冬酰胺	Amino acid and Its metabolites	氨基酸及其代谢物	Amino acid derivatives	氨基酸衍生物	173.1	174.064	[M-H]-	C6H10N2O4	1	223084	202788	220558	194027	232846	234287	233307	238295	268141	207262	255994	256112	-	HMDB0006028	99715	4033-40-3	-	-
MEDP2346*104	N-Ethylglycine	N-乙基甘氨酸	Amino acid and Its metabolites	氨基酸及其代谢物	Amino acid derivatives	氨基酸衍生物	104.1	103.063	[M+H]+	C4H9NO2	1	911099	763997	720747	924861	1.43086e+06	1.37533e+06	844640	1.03304e+06	814592	1.05341e+06	1.23025e+06	1.20361e+06	C11735	HMDB0041945	316542	627-01-0	15620	-
MEDP1996	N-Formylglycine	N-甲酰甘氨酸	Amino acid and Its metabolites	氨基酸及其代谢物	Amino acids	氨基酸	104	103.027	[M+H]+	C3H5NO3	1	1.32159e+06	1.23907e+06	1.19504e+06	1.09738e+06	1.50841e+06	1.23603e+06	1.40372e+06	1.47253e+06	1.05098e+06	1.13187e+06	1.28109e+06	1.06886e+06	-	-	75606	2491-15-8	-	-
MEDN0837	N-Methyl-L-Glutamate	N-甲基-L-谷氨酸	Amino acid and Its metabolites	氨基酸及其代谢物	Amino acid derivatives	氨基酸衍生物	160.1	161.069	[M-H]-	C6H11NO4	2	157879	150914	149775	135798	148015	157418	131122	131451	156888	134713	147914	134691	C01046	HMDB0062660	439377	35989-16-3	16440	-
MEDP0868*104	N-Methylalanine	N-甲基丙氨酸	Amino acid and Its metabolites	氨基酸及其代谢物	Amino acid derivatives	氨基酸衍生物	104	103.063	[M+H]+	C4H9NO2	1	911099	763997	720747	924861	1.43086e+06	1.37533e+06	844640	1.03304e+06	814592	1.05341e+06	1.23025e+06	1.20361e+06	C02721	HMDB0094692	5288725	3913-67-5	17519	-
MEDN1861	N-Myristoylglycine	N-肉豆蔻酰甘氨酸	Amino acid and Its metabolites	氨基酸及其代谢物	Amino acid derivatives	氨基酸衍生物	284.2	285.23	[M-H]-	C16H31NO3	2	73575.7	58780.8	57556.5	55483	51259.5	57043.9	56277	55229.2	50674.1	55609.4	52835.9	46427.6	-	HMDB0013250	72348	14246-55-0	87142	-
MEDN0632	N-Oleoyl Glycine	N-油酰甘氨酸	Alcohol and amines	醇、胺类	Amines	胺类	338.3	339.277	[M-H]-	C20H37NO3	2	34378.9	28728.5	32354	25653.7	25978.2	27474.6	33118.7	31487.6	27062	28209.3	29341.8	33732.2	-	HMDB0013631	6436908	2601-90-3	73723	-
MEDN1410	N-Palmitoylglycine	N-棕榈酰甘氨酸	Amino acid and Its metabolites	氨基酸及其代谢物	Amino acid derivatives	氨基酸衍生物	312.3	313.262	[M-H]-	C18H35NO3	2	282912	301808	305867	306442	309057	281516	316239	290859	308609	271058	280177	270251	D76997	HMDB0013034	151008	2441-41-0	479285	-
MEDN0062	N-Propionylglycine	丙甘氨酸	Amino acid and Its metabolites	氨基酸及其代谢物	Amino acids	氨基酸	130.1	131.058	[M-H]-	C5H9NO3	2	8024.86	7424.31	11230.6	12330.2	4538.27	10295.2	13645.1	13361.8	5810.65	11165.6	4783.1	6161.17	-	HMDB0000783	98681	21709-90-0	89836	5749
MEDP2478	N-acetyl-D-phenylalanine	N-乙酰-D-苯丙氨酸	Amino acid and Its metabolites	氨基酸及其代谢物	Amino acid derivatives	氨基酸衍生物	208.1	207.09	[M+H]+	C11H13NO3	2	622512	658415	586098	578100	585743	574367	597446	547485	646453	577965	573144	610357	C05620	-	101184	10172-89-1	-	-
MEDP1211	N-acetylpyrrolidine	N-乙酰基吡咯烷	Heterocyclic compounds	杂环化合物	Heterocyclic compounds	杂环化合物	114.1	113.084	[M+H]+	C6H11NO	2	102508	121048	91372.3	91897.4	91496.4	103433	85292.2	90137.9	94221.1	113228	94400.3	79589.9	-	-	77650	4030-18-6	-	-
MEDP1786	N1,N8-diacetylspermidine	N1，N8-二乙酰亚精胺	Alcohol and amines	醇、胺类	Amines	胺类	230.2	229.179	[M+H]+	C11H23N3O2	2	576711	641429	477197	1.26427e+06	1.51728e+06	1.42566e+06	679059	420397	390693	688010	584028	723182	-	HMDB0041947	389613	82414-35-5	-	-
MEDP2374	N1-Acetylspermidine	N1-乙酰亚精胺	Alcohol and amines	醇、胺类	Amines	胺类	188.2	187.168	[M+H]+	C9H21N3O	2	102897	103025	81615	88671.4	172359	162362	111408	155177	169835	130327	88414	99733.8	-	-	214848	34450-16-3	-	-
MEDP1788	N4-Acetylcytidine-triphosphate	N4-乙酰胞苷三磷酸	Nucleotide And Its metabolites	核苷酸及其代谢物	Nucleotide And Its metabolites	核苷酸及其代谢物	526	524.995	[M+H]+	C11H18N3O15P3	2	124535	116824	111063	114001	127956	124272	122038	121799	97998.7	98135.9	129352	122644	-	-	90117875	-	-	-
MEDN0052	N6-Acetyl-L-Lysine	N6-乙酰-L-赖氨酸	Amino acid and Its metabolites	氨基酸及其代谢物	Amino acid derivatives	氨基酸衍生物	187.1	188.116	[M-H]-	C8H16N2O3	2	2142.25	9425.35	8028.64	11152.1	12473	4547.07	10431.7	11309.5	8587.03	12186.7	7475.47	10129.8	C02727	HMDB0000206	92832	692-04-6	17752	5216
MEDP0378	N6-Succinyl Adenosine	N6-琥珀酰腺苷	Nucleotide And Its metabolites	核苷酸及其代谢物	Nucleotide And Its metabolites	核苷酸及其代谢物	384	383.108	[M+H]+	C14H17N5O8	1	44157.8	51378.4	58632.1	84072.8	86166	71597.9	48096	28188	50657.9	44422.7	38512.2	36255	-	HMDB0000912	20849086	4542-23-8	71169	5867
MEDP1493*155	N6-methyladenosine	N6-甲基腺苷	Nucleotide And Its metabolites	核苷酸及其代谢物	Nucleotide And Its metabolites	核苷酸及其代谢物	282	281.112	[M+H]+	C11H15N5O4	1	26961.9	46776	63512.1	96786.3	51410.4	72716.8	61646	62498.7	48462.2	49013.1	56595.3	48687.6	-	HMDB0004044	102175	1867-73-8	21891	-
MEDP2757	Niclosamide	灭绦灵	Others	其他	Medicine	药物	327	325.986	[M+H]+	C13H8Cl2N2O4	2	396483	341481	372092	1.20815e+06	370483	340350	360115	1.08085e+06	382019	1.22553e+06	1.19712e+06	1.36844e+06	-	-	4477	50-65-7	-	-
MEDP0242	Nicotinamide	烟酰胺	CoEnzyme and vitamins	辅酶和维生素	CoEnzyme and vitamins	辅酶和维生素	123.1	122.048	[M+H]+	C6H6N2O	1	1.5486e+06	1.54059e+06	1.84618e+06	2.52733e+06	1.97078e+06	2.26633e+06	1.6789e+06	1.85326e+06	1.34714e+06	1.64984e+06	1.72107e+06	1.49486e+06	C00153	HMDB0001406	936	98-92-0	17154	1497
MEDN1015	Nicotinic Acid	烟酸	CoEnzyme and vitamins	辅酶和维生素	CoEnzyme and vitamins	辅酶和维生素	122	123.032	[M-H]-	C6H5NO2	2	698384	743851	735918	749901	750984	659200	691979	688859	745888	653539	680398	703814	C00253	HMDB0001488	938	59-67-6	15940	6272
MEDP0173	Nicotinic Acid Adenine Dinucleotide	烟酰胺腺嘌呤双核苷酸	Nucleotide And Its metabolites	核苷酸及其代谢物	Nucleotide And Its metabolites	核苷酸及其代谢物	664.1	663.109	[M+H]+	C21H27N7O14P2	2	9798.53	17666.1	7763.79	16060.1	13946	23453.8	11990.2	27797.5	20455.7	17136.1	8981.53	10976.4	C00003	HMDB0000902	5893	53-84-9	15846	5858
MEDN2265	Norethindrone acetate	醋酸炔诺酮	Hormones and hormone related compounds	激素及激素相关物质	Hormones and hormone related compounds	激素及激素相关物质	339.2	340.204	[M-H]-	C22H28O3	2	48926	51196.3	51638.2	70024.3	54949.4	61341.8	61090.3	59692.6	62653.2	48640.9	53603.2	57468.7	-	HMDB0255731	5832	51-98-9	-	-
MEDP0849	Nα-Acetyl-L-glutamine	N-乙酰-L-谷氨酰胺	Amino acid and Its metabolites	氨基酸及其代谢物	Amino acid derivatives	氨基酸衍生物	189.1	188.183	[M+H]+	C7H12N2O4	1	169775	256824	243514	322485	178054	237629	192028	167891	266944	191767	329332	186911	D07063	HMDB0006029	25561	2490-97-3	21553	-
MEDP2336	O-Acetyl-L-homoserine	O-乙酰-L-高丝氨酸	Amino acid and Its metabolites	氨基酸及其代谢物	Amino acid derivatives	氨基酸衍生物	162.1	161.068	[M+H]+	C6H11NO4	2	16983.1	24706.1	16030.3	18064.1	17612.4	14199.3	24953.5	13818.1	22962.3	27773.5	26651.4	30363.3	-	-	45038083	250736-84-6	-	-
MEDN0616	O-Acetyl-L-serine	O-乙酰基-L-丝氨酸	Amino acid and Its metabolites	氨基酸及其代谢物	Amino acid derivatives	氨基酸衍生物	146	147.053	[M-H]-	C5H9NO4	2	1.65001e+06	1.56806e+06	1.91527e+06	1.71791e+06	1.6888e+06	1.62279e+06	1.71565e+06	1.57617e+06	1.63189e+06	1.66131e+06	1.36421e+06	1.47176e+06	C00979	HMDB0003011	99478	5147-00-2	17981	3270
MEDN0682	Octadecanamide	硬脂酰胺	Alcohol and amines	醇、胺类	Amines	胺类	282.3	283.288	[M-H]-	C18H37NO	2	73483.1	62610.2	58045.2	30966	63771.1	48267.1	67379.6	57550.3	68687.9	59384.7	64762.6	52143.5	C13846	HMDB0034146	31292	124-26-5	34900	-
MEDP0574	Oleamide	油酸酰胺	Alcohol and amines	醇、胺类	Amines	胺类	282.3	281.272	[M+H]+	C18H35NO	1	6.5403e+06	1.05594e+07	1.17218e+07	6.18734e+06	8.06143e+06	7.00385e+06	6.061e+06	4.70669e+06	9.39968e+06	5.69074e+06	8.37238e+06	8.97419e+06	C19670	HMDB0002117	5283387	301-02-0	116314	-
MEDP1083	Oxypurinol	奥昔嘌醇	Nucleotide And Its metabolites	核苷酸及其代谢物	Nucleotide And Its metabolites	核苷酸及其代谢物	153	152.033	[M+H]+	C5H4N4O2	2	403832	242360	338318	587667	971374	730143	478939	470269	344339	523763	515999	535587	C07599	HMDB0000786	135398752	2465-59-0	28315	5752
MEDP0101	P-Coumaric Acid	4-香豆酸	Benzene and substituted derivatives	苯及其衍生物	Phenolic acids	酚酸类	165	164.047	[M+H]+	C9H8O3	2	116568	148762	233327	166585	119052	141012	236030	141779	145383	174785	155952	199060	C00811	HMDB0002035	637542	501-98-4	32374	6450
MEDN1145	P-chlorophenylalanine	对氯苯丙氨酸	Benzene and substituted derivatives	苯及其衍生物	Phenolic acids	酚酸类	198	199.04	[M-H]-	C9H10ClNO2	1	3.81025e+06	3.43102e+06	3.77378e+06	4.43083e+06	4.04347e+06	3.7996e+06	3.69234e+06	4.73702e+06	3.89618e+06	3.99685e+06	3.93228e+06	4.32779e+06	D04143	-	4652	7424-00-2	-	-
MEDN2224	PA(18:1(9Z)/18:1(9Z))	1,2-二油酰基-sn-甘油-3-磷酸	GP	甘油磷脂类	PA	磷脂酸	699.5	700.504	[M-H]-	C39H73O8P	2	24015.4	26406.9	27314.5	26281.8	27578.5	27284.2	23682.4	24897.2	25561.1	24021.7	23504.3	26014.6	-	HMDB0007865	14057128	61617-08-1	83775	-
MEDP2765	PAF C-18:1	1-（9Z十八烯基）-2-乙酰基-sn-甘油-3-磷酸胆碱	GP	甘油磷脂类	LPC	溶血磷脂酰胆碱	550.4	549.379	[M+H]+	C28H56NO7P	2	240222	251236	253978	374199	385237	379014	316813	366042	295668	299237	280923	278588	-	HMDB0011148	16759362	85966-90-1	847856	-
MEDP1096	PC(12:0/12:0)	PC(12:0/12:0)	GP	甘油磷脂类	PC	磷脂酰胆碱	548.4	565.374	[M-H2O+H]+	C28H56NO8P	1	1.23502e+06	1.29012e+06	1.41602e+06	1.80261e+06	1.68339e+06	1.5713e+06	1.28273e+06	1.39148e+06	1.52029e+06	1.20943e+06	1.21333e+06	1.14158e+06	-	-	16219892	3436-44-0	-	-
MEDN2230	PC(18:0/18:2)	1-硬脂酰-2-亚油酸基-sn-甘油-3-磷酸胆碱	GP	甘油磷脂类	PC	磷脂酰胆碱	844.6	785.593	[M+CH3COO]-	C44H84NO8P	2	43705.4	36332.1	30770.4	30662.2	30166	28285.4	24505.6	24830.8	22319.3	40157.5	28897.5	18801.9	-	HMDB0008039	6441487	27098-24-4	84822	-
MEDN2235	PC(34:2)	PC(34:2)	GP	甘油磷脂类	PC	磷脂酰胆碱	816.6	757.562	[M+CH3COO]-	C42H80NO8P	2	23385.1	19173.8	18228.6	21268.5	27494.9	22681.8	20566.1	18555.4	16872.6	21960	20180.2	14147.1	-	-	24778802	-	-	-
MEDN2236	PC(36:3)	PC(36:3)	GP	甘油磷脂类	PC	磷脂酰胆碱	842.6	783.578	[M+CH3COO]-	C44H82NO8P	2	8866.38	6999.46	6982.19	6774.26	8513.08	7192.52	5865.27	6814.91	6996.06	7222.79	6288.92	6844.48	-	-	24778716	-	-	-
MEDP1068	PC(8:0/8:0)	PC(8:0/8:0)	GP	甘油磷脂类	PC	磷脂酰胆碱	510.3	509.312	[M+H]+	C24H48NO8P	1	428720	272197	245805	449744	471762	157668	149007	176168	259177	144780	154004	111352	-	-	24779244	19191-91-4	-	-
MEDP2792	PC(O-1:0/O-16:0)	PC(O-1:0/O-16:0)	GP	甘油磷脂类	PC-O	磷脂酰胆碱(醚键)	496.3	495.369	[M+H]+	C25H54NO6P	1	3.86115e+06	3.98937e+06	3.97964e+06	6.228e+06	4.92781e+06	4.36389e+06	4.95645e+06	4.99767e+06	5.44857e+06	4.27963e+06	4.00071e+06	3.95432e+06	-	-	-	-	-	-
MEDP2708	PE-NMe(16:1(9Z)/18:1(11Z))	PE-NMe(16:1(9Z)/18:1(11Z))	FA	脂肪酰类	Others	其他	752.5	729.531	[M+Na]+	C40H76NO8P	2	206592	177120	253099	166625	161665	128932	151552	173393	217271	241092	247081	245506	-	-	131820073	-	-	-
MEDN2266	PI(15:0/2:0)	PI(15:0/2:0)	GP	甘油磷脂类	PI	磷脂酰肌醇	599.3	600.291	[M-H]-	C26H49O13P	2	6571.76	7768	9002.58	7589.49	8486.87	8415.86	8779.56	7056.85	8282.6	6082.11	6350.56	8902.61	-	-	145719036	-	-	-
MEDN2262	PS(22:0)	PS(22:0)	GP	甘油磷脂类	PS	磷脂酰丝氨酸	594.4	595.349	[M-H]-	C28H54NO10P	2	276642	224740	193877	263249	241783	240189	243675	233400	220758	333954	322522	383505	-	-	138300232	-	-	-
MEDP1067	Palmitoyl-N-isopropylamide	棕榈酰基N-异丙基酰胺	Alcohol and amines	醇、胺类	Amines	胺类	320.3	297.303	[M+Na]+	C19H39NO	2	150212	179848	125208	159012	153190	116765	149630	139346	123687	508057	553614	540257	-	-	5063962	189939-61-5	-	-
MEDP1163	Palmitoylethanolamide	棕榈酰乙醇胺	Alcohol and amines	醇、胺类	Amines	胺类	298.3	297.267	[M+H]+	C18H35NO2	2	121155	127049	129975	587063	595543	575824	256503	289388	286052	285928	278534	323483	-	-	54428293	94421-67-7	-	-
MEDP1795	Palmitoylethanolamide（PEA）	棕榈乙醇胺	Alcohol and amines	醇、胺类	Amines	胺类	300.3	299.282	[M+H]+	C18H37NO2	2	61367.4	70915	93912.2	125404	126008	112673	108426	102840	105405	69442.9	94012.8	105695	C16512	HMDB0002100	4671	544-31-0	71464	-
MEDN0442	Pantetheine	泛酰巯基乙胺	CoEnzyme and vitamins	辅酶和维生素	CoEnzyme and vitamins	辅酶和维生素	277.1	278.13	[M-H]-	C11H22N2O4S	2	27222.3	28728.6	39673.3	24424.1	55479	59562.6	43394.1	38710.5	28497.8	40547	39239.6	34243.4	C00831	HMDB0003426	479	496-65-1	16753	6928
MEDN0245	Pantothenate	泛酸	CoEnzyme and vitamins	辅酶和维生素	CoEnzyme and vitamins	辅酶和维生素	218.1	219.1	[M-H]-	C9H17NO5	2	54219.6	57575.6	52904.1	80818.1	82833.2	84668.9	64649.5	79048.4	83411.8	50935.8	64883.6	59552.3	C00864	HMDB0000210	988	79-83-4	46905	-
MEDP2565	Phe-Ala	L-苯丙氨酸-L-丙氨酸	Amino acid and Its metabolites	氨基酸及其代谢物	Small Peptide	小肽	237.1	236.116	[M+H]+	C12H16N2O3	2	57110.3	14179.4	79356.7	70618.2	16120.3	74356.9	96567.5	100966	6089.06	42183.8	65121.7	60875.6	-	HMDB0028988	5488196	3918-87-4	-	-
MEDP2413*161	Phe-Ala-Ser	苯丙氨酸-丙氨酸-丝氨酸	Amino acid and Its metabolites	氨基酸及其代谢物	Small Peptide	小肽	324.2	323.148	[M+H]+	C15H21N3O5	2	21069.1	19400.5	12629.4	18795.9	16479	14546.4	24099.1	11061.3	25817.3	25032.5	21323.3	17934.4	-	-	145457127	-	-	-
MEDP1507	Phe-Asn	L-苯丙氨酰-L-天冬酰胺	Amino acid and Its metabolites	氨基酸及其代谢物	Small Peptide	小肽	280	279.122	[M+H]+	C13H17N3O4	2	23343.1	25629.4	47987.5	32799.4	20754.5	40054.2	48087.5	31032.8	24856.7	33743.9	36927.2	32995.6	-	-	10468817	-	-	-
MEDP2356	Phe-Asp	苯丙氨酸-天冬氨酸	Amino acid and Its metabolites	氨基酸及其代谢物	Small Peptide	小肽	281.1	280.105	[M+H]+	C13H16N2O5	2	50959	53539.8	80877.2	101391	74971.7	63284.9	111648	65237.9	57955.7	67375.4	68026	77330.8	-	-	6992643	22828-05-3	-	-
MEDP1667*158	Phe-Glu	苯丙氨酸-谷氨酸	Amino acid and Its metabolites	氨基酸及其代谢物	Small Peptide	小肽	295.1	294.122	[M+H]+	C14H18N2O5	2	190480	164123	385799	328286	240167	249323	334464	335911	215328	288276	251564	236386	-	HMDB0028994	151134	3617-45-6	-	-
MEDP2431	Phe-Gly	苯丙氨酸-甘氨酸	Amino acid and Its metabolites	氨基酸及其代谢物	Small Peptide	小肽	223.1	222.1	[M+H]+	C11H14N2O3	2	136795	166075	323353	251154	213616	228154	364892	384545	214239	241978	209036	261677	-	-	6992304	721-90-4	-	-
MEDP2600	Phe-His	L-苯丙氨酸-L-组氨酸	Amino acid and Its metabolites	氨基酸及其代谢物	Small Peptide	小肽	303.1	302.137	[M+H]+	C15H18N4O3	2	7669.31	7866.32	35513.2	19882.5	8412.79	23968.7	31161.7	25196.8	23972.5	22499.1	26567	30862.2	-	HMDB0028997	9966159	16874-81-0	-	-
MEDP2587	Phe-Hyp	L-苯丙氨酸-L-羟脯氨酸	Amino acid and Its metabolites	氨基酸及其代谢物	Amino acid derivatives	氨基酸衍生物	279.1	278.127	[M+H]+	C14H18N2O4	1	77991.9	78809.6	63816.1	88221.5	74860	72563.6	72126.4	86791.7	95147.9	92378.1	101732	79147	-	HMDB0011176	53480675	90965-82-5	-	-
MEDP2588	Phe-Ile	L-苯丙氨酸-L-异亮氨酸	Amino acid and Its metabolites	氨基酸及其代谢物	Small Peptide	小肽	279.2	278.162	[M+H]+	C15H22N2O3	1	126510	134698	199771	187881	126543	168963	257073	245533	160006	124176	153007	134546	-	HMDB0028998	7010566	22951-94-6	-	-
MEDP1508	Phe-Met	L-苯丙氨酰-L-蛋氨酸	Amino acid and Its metabolites	氨基酸及其代谢物	Small Peptide	小肽	297	296.119	[M+H]+	C14H20N2O3S	1	28923.4	33361.9	85902.3	66088.4	33214.4	35910.7	80276.5	66683.9	26004.8	34905.8	33683.6	38143.8	-	-	7010506	15080-84-9	-	-
MEDP0078	Phe-Phe	L-苯丙氨酸-L-苯丙氨酸	Amino acid and Its metabolites	氨基酸及其代谢物	Small Peptide	小肽	313.4	312.147	[M+H]+	C18H20N2O3	1	11059.5	14240.6	47069	28267.1	17404.1	41462.7	55691.9	62239.2	11167.2	26327.8	16178	21646.2	-	HMDB0013302	65104	2577-40-4	356630	-
MEDP2584*153	Phe-Thr	L-苯丙氨酸-L-苏氨酸	Amino acid and Its metabolites	氨基酸及其代谢物	Small Peptide	小肽	267.1	266.126	[M+H]+	C13H18N2O4	2	160132	180752	850498	566615	148560	415600	917610	759195	172754	369295	374996	338442	-	HMDB0029005	10445608	51352-44-4	-	-
MEDP2451	Phe-Tyr	L-苯丙氨酸-L-酪氨酸	Amino acid and Its metabolites	氨基酸及其代谢物	Small Peptide	小肽	329.1	328.142	[M+H]+	C18H20N2O4	1	103130	123679	319185	187308	87484.4	152931	365178	284450	146457	146030	188650	180631	-	-	515709	17355-18-9	-	-
MEDP1512	Phe-Val	苯丙氨酰-缬氨酸	Amino acid and Its metabolites	氨基酸及其代谢物	Small Peptide	小肽	265	264.147	[M+H]+	C14H20N2O3	2	137472	103784	282034	264179	98833.3	204789	379636	315618	150208	188404	208286	215194	-	HMDB0029008	4096934	-	-	-
MEDP2058	Phenethylamine	2-苯乙胺	Alcohol and amines	醇、胺类	Amines	胺类	122.1	121.089	[M+H]+	C8H11N	1	243013	283553	222742	235435	248286	226279	214132	263012	236596	225508	229027	212013	C05332	HMDB0012275	1001	64-04-0	18397	-
MEDN1050	Phenyl acetate	乙酸苯酯	Benzene and substituted derivatives	苯及其衍生物	Benzene and substituted derivatives	苯及其衍生物	135	136.052	[M-H]-	C8H8O2	2	131036	116331	141037	127219	125399	131908	143173	142806	127346	121897	130914	139694	C00548	HMDB0040733	31229	122-79-2	8082	-
MEDP0858	Phosphoenolpyruvate	磷酸烯醇丙酮酸	Organic acid And Its derivatives	有机酸及其衍生物	Phosphoric acids	磷酸类化合物	169	167.982	[M+H]+	C3H5O6P	2	217980	328884	287625	194209	206624	252367	302646	213595	195567	229421	222982	198409	C00074	HMDB0000263	1005	138-08-9	-	-
MEDN1567	Phosphonoacetic acid	磷酰基乙酸	Organic acid And Its derivatives	有机酸及其衍生物	Phosphoric acids	磷酸类化合物	138.6	139.987	[M-H]-	C2H5O5P	1	1.02632e+06	1.45292e+06	892797	1.37567e+06	1.16e+06	977898	924824	1.32049e+06	1.5388e+06	1.27135e+06	1.29041e+06	1.14697e+06	C05682	HMDB0004110	546	4408-78-0	15732	7018
MEDN0096*028	Phthalic Acid	邻苯二甲酸	Benzene and substituted derivatives	苯及其衍生物	Phenolic acids	酚酸类	165	166.027	[M-H]-	C8H6O4	2	105798	153922	132318	146149	164457	101679	115221	173601	127348	137498	145820	154374	C01606	HMDB0002107	1017	88-99-3	29069	6489
MEDN1840*054	Pinolenic acid	皮诺敛酸	FA	脂肪酰类	FFA	游离脂肪酸	277.2	278.225	[M-H]-	C18H30O2	2	158776	170866	163249	203177	201343	188061	183094	186416	201186	182509	172886	187741	-	-	5312495	16833-54-8	-	-
MEDN1722	Piperic acid	胡椒酸	Organic acid And Its derivatives	有机酸及其衍生物	Organic acid And Its derivatives	有机酸及其衍生物	165	166.027	[M-H]-	C8H6O4	2	2.04511e+06	2.04991e+06	2.05448e+06	2.17144e+06	2.10948e+06	1.92738e+06	2.26525e+06	2.43289e+06	2.18634e+06	2.0255e+06	2.23878e+06	2.27051e+06	C04599	HMDB0032613	7196	94-53-1	-	-
MEDP0456	Piperidine	哌啶	Heterocyclic compounds	杂环化合物	Heterocyclic compounds	杂环化合物	86.1	85.0891	[M+H]+	C5H11N	2	94812.1	100528	166113	116119	100856	103986	159682	151381	97753.1	116492	99621	115784	C01746	HMDB0034301	8082	110-89-4	18049	-
MEDP0395	Piperidine acid	D-哌啶酸	Organic acid And Its derivatives	有机酸及其衍生物	Organic acid And Its derivatives	有机酸及其衍生物	130	129.079	[M+H]+	C6H11NO2	1	112203	115753	108636	145998	132222	126344	81785.9	305418	97487.6	203513	259531	240723	C00408	HMDB0005960	439227	3105-95-1	41582	-
MEDP1304	Piperidone	哌啶酮	Heterocyclic compounds	杂环化合物	Heterocyclic compounds	杂环化合物	170.1	169.11	[M+H]+	C9H15NO2	2	656504	491130	345127	337395	304195	336485	337491	207091	344948	400552	417616	460754	C17730	-	6465	1977/3/2	-	-
MEDN0622	Porphobilinogen	紫质胆素原	Organic acid And Its derivatives	有机酸及其衍生物	Organic acid And Its derivatives	有机酸及其衍生物	225.1	226.095	[M-H]-	C10H14N2O4	2	1.11626e+07	1.05389e+07	1.16687e+07	1.3081e+07	1.10546e+07	1.25477e+07	1.32255e+07	1.40292e+07	1.37039e+07	1.28677e+07	1.12161e+07	1.19526e+07	C00931	HMDB0000245	1021	487-90-1	-	-
MEDP2357	Pro-Ala	脯氨酸-丙氨酸	Amino acid and Its metabolites	氨基酸及其代谢物	Small Peptide	小肽	187.1	186.1	[M+H]+	C8H14N2O3	2	466021	527715	356237	457755	401443	717904	470131	484585	420263	524115	588272	499546	-	-	6347578	6422-36-2	-	-
MEDN2113	Pro-Asp	L-脯氨酸-L-天冬氨酸	Amino acid and Its metabolites	氨基酸及其代谢物	Small Peptide	小肽	229.1	230.091	[M-H]-	C9H14N2O5	2	8751.95	2549.73	9829.8	2136.2	1084.76	7552.62	2593.94	7202.43	4847.17	3190.61	3844.03	6235.06	-	-	7079450	85227-98-1	-	-
MEDP2567	Pro-Gln	L-脯氨酸-L-谷氨酰胺	Amino acid and Its metabolites	氨基酸及其代谢物	Small Peptide	小肽	244.1	243.121	[M+H]+	C10H17N3O4	2	19481.8	15769.3	18728.1	29508.5	25657.3	18476.5	29690.2	26983.9	40639.7	21665.8	18314.6	18573	-	-	7408110	18668-08-1	-	-
MEDN1559	Pro-Gly	L-脯氨酸-L-甘氨酸	Amino acid and Its metabolites	氨基酸及其代谢物	Small Peptide	小肽	171.1	172.085	[M-H]-	C7H12N2O3	2	15279	28677.9	20033.2	29333.2	27656.7	35618.2	22277.9	12977.6	37195.1	16037.5	38152.5	40229.1	-	HMDB0011178	6426709	2578-57-6	61695	-
MEDP2339	Pro-Ser	脯氨酸-丝氨酸	Amino acid and Its metabolites	氨基酸及其代谢物	Small Peptide	小肽	203.1	202.095	[M+H]+	C8H14N2O4	1	48396.6	27076.1	21178.4	23934.2	21432.3	18176.5	20772.7	18537.7	20499.6	20534.9	23014.8	26273.7	-	-	7408258	71835-80-8	-	-
MEDP1802	Proline betaine	脯氨酸甜菜碱	Amino acid and Its metabolites	氨基酸及其代谢物	Amino acid derivatives	氨基酸衍生物	144.1	143.095	[M+H]+	C7H13NO2	1	645238	851793	568872	764693	757519	743534	568364	746658	648607	655564	662710	547950	C10172	HMDB0004827	115244	471-87-4	35280	7089
MEDP2426	Proline-Hydroxyproline	脯氨酸羟脯氨酸	Amino acid and Its metabolites	氨基酸及其代谢物	Small Peptide	小肽	229.1	228.11	[M+H]+	C10H16N2O4	2	33997.6	30783.4	49918.9	50743.9	35389.2	63335.5	89108.4	68723.6	28967.5	46214.7	30514.4	36588	-	HMDB0006695	3952518	18684-24-7	74767	-
MEDN1430*060	Prostaglandin A2	前列腺素A2	FA	脂肪酰类	Oxidized lipids	氧化脂质	333.2	334.214	[M-H]-	C20H30O4	2	8307.28	1471.04	28849	40574.9	8091.78	10813.7	19400.7	23685.6	12704.4	13446.7	16182.3	16639.4	C05953	HMDB0002752	5280880	13345-50-1	27820	-
MEDP0174	Purine	嘌呤碱	Nucleotide And Its metabolites	核苷酸及其代谢物	Nucleotide And Its metabolites	核苷酸及其代谢物	121	120.044	[M+H]+	C5H4N4	2	1.071e+06	1.46548e+06	1.2485e+06	1.25537e+06	1.30302e+06	937738	1.18827e+06	1.24965e+06	1.35007e+06	1.15865e+06	1.18347e+06	1.1394e+06	C15587	HMDB0001366	1044	120-73-0	17258	6193
MEDP0127	Putrescine	腐胺	Alcohol and amines	醇、胺类	Polyamines	多胺	89	88.1	[M+H]+	C4H12N2	2	261806	267288	261255	324760	270562	358855	283788	249675	306864	281137	246717	293019	C00134	HMDB0001414	1045	110-60-1	17148	3226
MEDN2096	Pyrazine-2-carboxylic acid	吡嗪-2-羧酸	Organic acid And Its derivatives	有机酸及其衍生物	Organic acid And Its derivatives	有机酸及其衍生物	123	124.028	[M-H]-	C5H4N2O2	2	785395	726564	805595	737384	826314	685567	839397	817182	802641	732974	694090	783049	C19915	HMDB0059734	1047	98-97-5	71311	-
MEDP0898	Pyridoxal	吡哆醛	Heterocyclic compounds	杂环化合物	Pteridines and derivatives	蝶啶及其衍生物	168.3	167.058	[M+H]+	C8H9NO3	2	950558	649898	999432	676832	901569	699850	1.11731e+06	958098	775233	809022	909656	658411	C00250	HMDB0001545	1050	66-72-8	17310	6312
MEDP0240	Pyridoxine	吡哆素	CoEnzyme and vitamins	辅酶和维生素	CoEnzyme and vitamins	辅酶和维生素	170.1	169.074	[M+H]+	C8H11NO3	2	5455.71	16313.6	14784.4	3088.99	8314.13	11518.4	5018.84	2600.88	11749.2	22016.3	8043.33	17353.2	C00314	HMDB0000239	1054	65-23-6	-	-
MEDN0448	Pyridoxine 5'-Phosphate	5-磷酸吡哆醇	CoEnzyme and vitamins	辅酶和维生素	CoEnzyme and vitamins	辅酶和维生素	248	249.04	[M-H]-	C8H12NO6P	1	957326	1.27359e+06	1.15136e+06	1.07762e+06	1.28465e+06	1.66409e+06	1.06643e+06	2.42398e+06	1.36744e+06	1.2656e+06	1.50921e+06	1.64575e+06	C00627	HMDB0001319	1055	447-05-2	28803	6156
MEDN1966	Pyrimidine-4-carboxylic acid	嘧啶-4-羧酸	Heterocyclic compounds	杂环化合物	Heterocyclic compounds	杂环化合物	123	124.1	[M-H]-	C5H4N2O2	2	788805	801393	779609	757872	802753	719271	827684	845072	784723	715187	717295	774795	-	-	24820426	819850-18-5	-	-
MEDN1574	Pyrithioxin	黄曲霉毒素	Others	其他	Others	其他	367.1	368.086	[M-H]-	C16H20N2O4S2	2	12505.4	12099.3	12298.8	16157.2	9308.89	10329	10610.5	10480.6	12297	6639.17	15296.7	12226	C71346	-	14190	1098-97-1	-	-
MEDP0892	Pyrocatechol	邻苯二酚	Benzene and substituted derivatives	苯及其衍生物	Phenolics	苯酚类	111.1	110.037	[M+H]+	C6H6O2	1	5.27928e+06	5.54389e+06	5.28532e+06	5.42954e+06	5.64107e+06	4.67182e+06	5.27513e+06	5.92528e+06	5.38446e+06	4.66994e+06	5.06847e+06	4.53913e+06	C00090	HMDB0000957	289	120-80-9	18135	282
MEDP2001	Pyroglutamic acid	L-焦谷氨酸	Amino acid and Its metabolites	氨基酸及其代谢物	Amino acids	氨基酸	130	129.043	[M+H]+	C5H7NO3	1	112203	115753	108636	145998	132222	126344	81785.9	305418	97487.6	203513	259531	240723	C01879	HMDB0000267	7405	98-79-3	-	-
MEDP0792	Pyrrolidine	四氢吡咯	Heterocyclic compounds	杂环化合物	Heterocyclic compounds	杂环化合物	72.3	71.0735	[M+H]+	C4H9N	1	87703.9	83330.2	77194.9	112267	90209.1	100748	137611	167362	82168.3	106093	104950	102426	-	HMDB0031641	31268	123-75-1	33135	-
MEDN0097*019	P–Hydroxyphenyl Acetic Acid	对-羟基苯乙酸	Benzene and substituted derivatives	苯及其衍生物	Phenolic acids	酚酸类	151	152.047	[M-H]-	C8H8O3	1	57941.7	41736.9	66407.6	50441.7	50747.6	71266	47222.8	77811.2	53535.5	56063.8	74301.8	71608.5	C00642	HMDB0000020	127	156-38-7	18101	130
MEDP2643	Quinmerac	7-氯-3-甲基喹啉-8-羧酸	Benzene and substituted derivatives	苯及其衍生物	Benzene and substituted derivatives	苯及其衍生物	222	221.024	[M+H]+	C11H8ClNO2	2	4.52718e+06	4.56385e+06	4.57688e+06	4.40961e+06	4.50047e+06	4.43456e+06	4.26133e+06	4.49142e+06	4.27363e+06	4.33762e+06	4.18134e+06	4.23849e+06	C18891	HMDB0257043	91749	90717-03-6	-	-
MEDN0236*060	Raffinose	棉籽糖	Carbohydrates and Its metabolites	碳水化合物及其代谢物	Sugars	糖类	503.2	504.169	[M-H]-	C18H32O16	2	8307.28	1471.04	28849	40574.9	8091.78	10813.7	19400.7	23685.6	12704.4	13446.7	16182.3	16639.4	C00492	HMDB0003213	10542	512-69-6	16634	-
MEDN1018*020	Ribitol	核糖醇	Carbohydrates and Its metabolites	碳水化合物及其代谢物	Sugar alcohols	糖醇	151.1	152.069	[M-H]-	C5H12O5	2	193829	162906	133562	168315	115177	133737	105852	177174	169468	170390	232782	158670	C00474	HMDB0000508	6912	488-81-3	15963	316
MEDP0250	Riboflavin	核黄素	CoEnzyme and vitamins	辅酶和维生素	CoEnzyme and vitamins	辅酶和维生素	377	376.138	[M+H]+	C17H20N4O6	1	263138	293128	402232	514112	570943	457992	390854	443236	399945	321117	319347	310571	C00255	HMDB0000244	493570	83-88-5	-	-
MEDP1280	S-Adenosyl-L-Methionine	S-腺苷蛋氨酸	Amino acid and Its metabolites	氨基酸及其代谢物	Amino acid derivatives	氨基酸衍生物	399.1	398.137	[M+H]+	C15H22N6O5S	2	3.21301e+06	3.37909e+06	3.82979e+06	2.48122e+06	4.00038e+06	4.00894e+06	2.97343e+06	3.05721e+06	3.16201e+06	1.81094e+06	2.77384e+06	3.06124e+06	C00019	HMDB0001185	9865603	17176-17-9	15414	6064
MEDP2267	S-methyl-L-thiocitrulline	S-甲基-L-硫代瓜氨酸	Amino acid and Its metabolites	氨基酸及其代谢物	Amino acid derivatives	氨基酸衍生物	206.1	205.088	[M+H]+	C7H15N3O2S	1	243803	213635	234355	229132	245805	251965	196166	231481	155792	186884	263925	237976	-	-	2733508	209589-59-3	-	-
MEDP1488	SDMA	(S)-2-氨基-5-((双(甲基氨基)亚甲基)氨基)戊酸	Organic acid And Its derivatives	有机酸及其衍生物	Organic acid And Its derivatives	有机酸及其衍生物	203	202.143	[M+H]+	C8H18N4O2	1	40000.1	33233.4	26099.4	45390.9	48437.3	34572.8	26745.9	47373.2	47877.5	51671.5	45522.9	44853.8	-	HMDB0003334	169148	30344-00-4	25682	6891
MEDP2824	SPH(d16:1)	鞘氨醇_SPH(d16:1)	SL	鞘脂类	SPH	鞘氨醇	272.3	271.251	[M+H]+	C16H33NO2	2	350822	342181	294946	340817	325690	339349	329591	320368	299423	387367	404196	409936	-	-	14767871	-	-	-
MEDP2241	SPH(d17:1)	鞘氨醇_SPH(d17:1)	SL	鞘脂类	SPH	鞘氨醇	286.3	285.266	[M+H]+	C17H35NO2	2	2.22664e+06	2.25568e+06	2.15854e+06	2.81718e+06	2.73162e+06	2.66222e+06	1.92442e+06	2.13431e+06	2.19489e+06	2.25615e+06	2.07998e+06	2.19136e+06	-	-	5283557	6918-48-5	-	-
MEDN2338	Salicylic acid	水杨酸	Organic acid And Its derivatives	有机酸及其衍生物	Organic acid And Its derivatives	有机酸及其衍生物	137	138.032	[M-H]-	C7H6O3	2	369248	392323	350695	405308	367551	419174	387511	397400	418495	398018	414240	463320	C00805	HMDB0001895	338	69-72-7	16914	616
MEDP0404	Sarcosine	肌氨酸	Amino acid and Its metabolites	氨基酸及其代谢物	Amino acids	氨基酸	90	89.048	[M+H]+	C3H7NO2	2	495801	556481	507095	501087	458056	607489	471902	362818	430050	486730	520181	340238	C00213	HMDB0000271	1088	107-97-1	15611	51
MEDN0342	Sebacate	癸二酸	Organic acid And Its derivatives	有机酸及其衍生物	Organic acid And Its derivatives	有机酸及其衍生物	201.1	202.121	[M-H]-	C10H18O4	1	811896	778830	863319	906242	897920	891546	908223	858078	808226	820316	888458	863686	C08277	HMDB0000792	5192	111-20-6	41865	4240
MEDP2488	Securinine	一叶萩碱	Amino acid and Its metabolites	氨基酸及其代谢物	Amino acid derivatives	氨基酸衍生物	240.1	217.11	[M+H]+	C13H15NO2	2	506737	603060	464279	445103	449392	462479	396196	425198	500125	410600	381922	370086	C10614	-	442872	5610-40-2	-	-
MEDP1497	Selenomethionine	硒代蛋氨酸	Amino acid and Its metabolites	氨基酸及其代谢物	Amino acids	氨基酸	197	196.12	[M+H]+	C5H11NO2Se	2	61295.8	55266	44352.8	60876.8	58743.3	51647.8	49215.1	51653.6	44840.1	65807.8	52512.4	48018.1	C05335	-	15103	1464-42-2	-	-
MEDP2493	Ser-Arg	丝氨酸-精氨酸	Amino acid and Its metabolites	氨基酸及其代谢物	Small Peptide	小肽	262.2	261.143	[M+H]+	C9H19N5O4	2	46079.6	54335	46050.7	39494	36773.2	50726.1	37655.6	45807.8	64656.4	46376.6	36915.8	42166.5	-	-	9856515	-	-	-
MEDP1947	Ser-Ile	丝氨酰-异亮氨酸	Amino acid and Its metabolites	氨基酸及其代谢物	Small Peptide	小肽	219.1	218.127	[M+H]+	C9H18N2O4	2	43538.8	62885	98871.3	84386	40272.5	66515.1	126614	113028	83663.4	74487.2	72000.6	67670.7	-	-	71429009	91086-51-0	-	-
MEDP1888	Ser-Leu	丝氨酸-亮氨酸	Amino acid and Its metabolites	氨基酸及其代谢物	Small Peptide	小肽	219.1	218.127	[M+H]+	C9H18N2O4	2	53291.4	54745.8	119275	91479.9	40201	71466.1	105751	121864	60387.9	63518.3	77135	57437.7	-	HMDB0029043	7015695	6665-16-3	74815	-
MEDP1889	Ser-Phe	丝氨酸-苯丙氨酸	Amino acid and Its metabolites	氨基酸及其代谢物	Small Peptide	小肽	253.1	252.111	[M+H]+	C12H16N2O4	2	109335	93972.9	283165	187116	103439	156236	281379	253378	106819	159000	149109	132752	-	HMDB0029046	7009598	16875-28-8	71029	-
MEDP2414*161	Ser-Phe-Ala	丝氨酸-苯丙氨酸-丙氨酸	Amino acid and Its metabolites	氨基酸及其代谢物	Small Peptide	小肽	324.2	323.148	[M+H]+	C15H21N3O5	2	21069.1	19400.5	12629.4	18795.9	16479	14546.4	24099.1	11061.3	25817.3	25032.5	21323.3	17934.4	-	-	15817515	-	-	-
MEDP1356	Shinorine	霉菌素-甘氨酸(维生素A)	Amino acid and Its metabolites	氨基酸及其代谢物	Amino acid derivatives	氨基酸衍生物	333.1	332.122	[M+H]+	C13H20N2O8	2	409372	334806	404271	367009	365147	370359	421916	383929	367570	382148	395703	318776	-	HMDB0039002	10471931	73112-73-9	-	-
MEDP0442	Sn-Glycero-3-Phosphocholine	sn-甘油-3-磷酸胆碱	Tryptamines,Cholines,Pigments	色胺、胆碱、色素	Cholines	胆碱类	258.2	257.103	[M+H]+	C8H20NO6P	1	5.56707e+06	6.25204e+06	4.85105e+06	7.03572e+06	7.8209e+06	8.65881e+06	6.77292e+06	7.08729e+06	6.77686e+06	9.33889e+06	7.42434e+06	8.60848e+06	C00670	HMDB0000086	71920	28319-77-9	16870	370
MEDP0601	Spermidine	亚精胺	Alcohol and amines	醇、胺类	Polyamines	多胺	146.2	145.158	[M+H]+	C7H19N3	2	2.57212e+06	2.02728e+06	2.18163e+06	3.12784e+06	2.69565e+06	2.18466e+06	1.84376e+06	3.31405e+06	1.86409e+06	2.86803e+06	2.48374e+06	2.35268e+06	C00315	HMDB0001257	1102	124-20-9	16610	254
MEDN0344	Subericacid	辛二酸	Organic acid And Its derivatives	有机酸及其衍生物	Organic acid And Its derivatives	有机酸及其衍生物	173.1	174.089	[M-H]-	C8H14O4	1	2.33459e+06	2.4068e+06	2.42735e+06	2.50148e+06	2.41169e+06	2.52783e+06	2.36869e+06	2.44753e+06	2.43171e+06	2.44069e+06	2.47649e+06	2.46756e+06	C08278	HMDB0000893	10457	505-48-6	9300	4243
MEDN0201*066	Succinic Acid	琥珀酸	Organic acid And Its derivatives	有机酸及其衍生物	Organic acid And Its derivatives	有机酸及其衍生物	117	118.027	[M-H]-	C4H6O4	1	308761	267233	300231	389940	299981	294210	312600	317178	320597	278898	312846	277704	C00042	HMDB0000254	1110	110-15-6	-	-
MEDN0651	Succinic anhydride	琥珀酸酐	Organic acid And Its derivatives	有机酸及其衍生物	Organic acid And Its derivatives	有机酸及其衍生物	99	100.016	[M-H]-	C4H4O3	1	767341	1.17166e+06	675269	497240	961587	1.0056e+06	957877	1.02762e+06	870997	816864	786132	775465	C19524	HMDB0032523	7922	108-30-5	36595	-
MEDN1576	Sucrose 6′-monophosphate	蔗糖6'-单磷酸	Carbohydrates and Its metabolites	碳水化合物及其代谢物	Phosphate sugars	磷酸糖	421.1	422.083	[M-H]-	C12H23O14P	2	68885.9	48151.1	61806.2	69329.5	106584	68278	74575.4	96860.6	40814.5	76417.3	109968	75376.3	-	-	439762	36064-19-4	-	-
MEDP1803	Synephrine	辛弗林	Benzene and substituted derivatives	苯及其衍生物	Phenolic acids	酚酸类	168.1	167.095	[M+H]+	C9H13NO2	2	417236	598849	269759	414733	959768	402301	651032	816841	370752	918324	389765	741148	C04548	HMDB0004826	7172	1994/7/5	29081	7088
MEDN1059	Tauroursodeoxycholic acid	牛磺熊去氧胆酸	Bile acids	胆汁酸	Bile acids	胆汁酸	498.3	499.297	[M-H]-	C26H45NO6S	1	77963.6	73287.7	78682.5	73003.2	66325.9	56690.9	76471	156652	67022.4	43167.3	60647.7	47543.9	C05463	HMDB0000896	9848818	14605-22-2	9410	5853
MEDN0086	Terephthalic Acid	对苯二甲酸	Benzene and substituted derivatives	苯及其衍生物	Phenolic acids	酚酸类	165	166.027	[M-H]-	C8H6O4	2	158080	147125	143311	152067	201331	113526	109078	178210	173898	167272	124627	104902	C06337	HMDB0002428	7489	100-21-0	15702	6676
MEDP2797	Testosterone	睾酮	Hormones and hormone related compunds	激素及激素相关物质	Hormones and hormone related compounds	激素及激素相关物质	289.2	288.209	[M+H]+	C19H28O2	2	214335	243484	224165	195305	237586	211538	219750	226143	229067	227621	221427	220668	C00535	HMDB0000234	6013	58-22-0	17347	-
MEDN0604	Tetradecanedioic acid	十四烷二酸	FA	脂肪酰类	FFA	游离脂肪酸	257.2	258.183	[M-H]-	C14H26O4	2	60471.1	78253.8	69913.8	80351.4	75346.4	71099.4	82993.9	69725.3	73726.5	83286.7	77015.9	74333.1	C11002	HMDB0000872	13185	821-38-5	76308	5833
MEDN1719	Tetradecyl phosphonic acid	十四烷基膦酸	Organic acid And Its derivatives	有机酸及其衍生物	Organic acid And Its derivatives	有机酸及其衍生物	277.2	278.201	[M-H]-	C14H31O3P	2	250078	265339	278022	271670	266965	265911	257379	266420	286967	235227	236453	260109	-	-	78401	4671-75-4	-	-
MEDP2436	Tetraethylene-glycol	三缩四乙二醇	Alcohol and amines	醇、胺类	Alcohols	醇类	195.1	194.115	[M+H]+	C8H18O5	2	253519	350754	209618	522921	300384	467420	310593	529235	298630	333846	348806	342556	-	HMDB0094708	8200	112-60-7	44920	-
MEDP0120	Theobromine	可可碱	Nucleotide And Its metabolites	核苷酸及其代谢物	Nucleotide And Its metabolites	核苷酸及其代谢物	181	180.065	[M+H]+	C7H8N4O2	2	26933.2	25736.8	33385.8	50749.3	32023.7	52142	42961.6	38407.1	28495.1	29218.2	34443.3	34512.1	C07480	HMDB0002825	5429	83-67-0	28946	1456
MEDN0134	Thiamine Pyrophosphate (TPP)	焦磷酸硫胺素	CoEnzyme and vitamins	辅酶和维生素	CoEnzyme and vitamins	辅酶和维生素	424	425.045	[M-H]-	C12H19N4O7P2S	2	7405.92	9067.32	9930	14841.8	10993	8594.07	16247.1	11973.7	6669.26	11268.8	11130.2	11907.9	C00068	HMDB0001372	1132	154-87-0	9532	2832
MEDP2494	Thr-Arg	L-苏氨酸-L-精氨酸	Amino acid and Its metabolites	氨基酸及其代谢物	Small Peptide	小肽	276.2	275.159	[M+H]+	C10H21N5O4	2	603043	538064	598708	595214	537268	665678	592213	676482	690370	653584	614860	618474	-	-	7016110	13448-26-5	-	-
MEDP2340	Thr-Asp	L-苏氨酸-L-天冬氨酸	Amino acid and Its metabolites	氨基酸及其代谢物	Small Peptide	小肽	235.1	234.085	[M+H]+	C8H14N2O6	2	86995	108746	96772.5	104041	122162	98255.2	100373	101444	111179	112302	99563.8	116737	-	-	3280446	108320-97-4	-	-
MEDP2496	Thr-His	L-苏氨酸-L-组氨酸	Amino acid and Its metabolites	氨基酸及其代谢物	Small Peptide	小肽	257.1	256.117	[M+H]+	C10H16N4O4	2	29617.7	18205.6	22452.7	20354.4	34397.7	32450.4	28579.1	26373	18234.4	24205	23899	10578.1	-	-	9943049	-	-	-
MEDP2416*141	Thr-Ile	苏氨酸-异亮氨酸	Amino acid and Its metabolites	氨基酸及其代谢物	Small Peptide	小肽	233.1	232.14	[M+H]+	C10H20N2O4	2	71591	83411.6	148427	119979	65902.5	113275	175394	214692	93103.4	90430.2	117287	98792.5	-	-	18218246	-	-	-
MEDP1912*141	Thr-Leu	L-苏氨酸-L-亮氨酸	Amino acid and Its metabolites	氨基酸及其代谢物	Small Peptide	小肽	233.1	232.142	[M+H]+	C10H20N2O4	2	71591	83411.6	148427	119979	65902.5	113275	175394	214692	93103.4	90430.2	117287	98792.5	-	HMDB0029065	7021828	50299-12-2	-	-
MEDP1022*153	Thr-Phe	L-苏氨酸-L-苯丙氨酸	Amino acid and Its metabolites	氨基酸及其代谢物	Small Peptide	小肽	267.1	266.127	[M+H]+	C13H18N2O4	2	160132	180752	850498	566615	148560	415600	917610	759195	172754	369295	374996	338442	-	HMDB0029068	4099799	16875-27-7	-	-
MEDP2591	Thr-Tyr	L-苏氨酸-L-酪氨酸	Amino acid and Its metabolites	氨基酸及其代谢物	Small Peptide	小肽	283.1	282.121	[M+H]+	C13H18N2O5	2	23086.2	19930.8	37290	33999.8	22283.7	38002.2	50760.3	48988.3	33177.7	34683.1	30605.1	29704.2	-	HMDB0029073	11778518	145295-02-9	-	-
MEDP1678	Thr-Val-Leu	苏氨酸-缬氨酸-亮氨酸	Amino acid and Its metabolites	氨基酸及其代谢物	Small Peptide	小肽	332.2	331.211	[M+H]+	C15H29N3O5	2	97925.5	64137.1	102278	107022	111281	70406.4	111960	183375	156689	88073.2	107661	92736.8	-	-	49864481	-	-	-
MEDP2696	Traumatin	12-氧代-10E-十二烯酸	Organic acid And Its derivatives	有机酸及其衍生物	Organic acid And Its derivatives	有机酸及其衍生物	195.1	212.141	[M+H-H2O]+	C12H20O3	2	3.34101e+08	3.2571e+08	3.36931e+08	3.44247e+08	3.23535e+08	3.28664e+08	3.40916e+08	3.37091e+08	3.4504e+08	3.44436e+08	3.37192e+08	3.53672e+08	-	HMDB0037326	5312889	65410-38-0	19144	-
MEDN1406	Tridecanedioic acid	十三烷二酸	FA	脂肪酰类	FFA	游离脂肪酸	243.2	244.167	[M-H]-	C13H24O4	1	204191	250780	191954	270768	227612	226381	260932	264574	242147	223342	240970	208201	-	-	10458	505-52-2	-	-
MEDP2332	Triethanolamine	三乙醇胺	Alcohol and amines	醇、胺类	Alcohols	醇类	150.1	149.105	[M+H]+	C6H15NO3	2	717453	714558	721286	605176	849198	611312	648797	642356	692978	1.01581e+06	572992	673706	C06771	HMDB0032538	7618	102-71-6	28621	-
MEDP0692	Triethylamine	三乙胺	Others	其他	Hydrocarbon derivatives	烃衍生物	102	101.12	[M+H]+	C6H15N	2	428639	278556	458797	450263	413203	417639	468284	381387	453425	421694	412083	379755	C14691	HMDB0032539	8471	121-44-8	35026	-
MEDP2066	Triethylenetetramine	三乙烯四胺	Alcohol and amines	醇、胺类	Polyamines	多胺	147.2	146.153	[M+H]+	C6H18N4	2	444193	434454	402263	343260	307041	390104	301343	388365	279201	543231	388445	390044	C07166	-	5565	112-24-3	-	-
MEDP0084*101	Trimethylamine-N-Oxide	氧化三甲胺	Alcohol and amines	醇、胺类	Amines	胺类	76	75.0684	[M+H]+	C3H9NO	1	35715.6	47095.5	54432.7	50350.4	63100.2	55542.9	64844.1	44942.4	39433.1	62809.1	41386	54038.7	C01104	HMDB0000925	1145	1184-78-7	15724	5876
MEDP2316	Trp-Thr	L-色氨酸-L-苏氨酸	Amino acid and Its metabolites	氨基酸及其代谢物	Small Peptide	小肽	306.1	305.138	[M+H]+	C15H19N3O4	2	9	2321.99	15484.1	9962.74	14039.6	9845.57	19551.2	15217	5203.19	17444.1	16567.7	16067.2	-	-	17773480	-	-	-
MEDP2575	Tyr-Ala	L-酪氨酸-L-丙氨酸	Amino acid and Its metabolites	氨基酸及其代谢物	Small Peptide	小肽	253.1	252.111	[M+H]+	C12H16N2O4	2	56289.8	98561.1	45010	139104	77771.4	125088	216121	162016	82663.7	147448	120754	88955.7	-	-	5496455	730-08-5	-	-
MEDP2385	Tyr-Asn	L-酪氨酸-L-天冬酰胺	Amino acid and Its metabolites	氨基酸及其代谢物	Small Peptide	小肽	296.1	295.117	[M+H]+	C13H17N3O5	2	10952.2	14739.2	61027.6	37946.1	28509.5	53130.4	50247.2	82059.7	25087.5	32113.5	41665.3	57060.4	-	-	18218251	151145-11-8	-	-
MEDP2391	Tyr-Glu	L-酪氨酸-L-谷氨酸	Amino acid and Its metabolites	氨基酸及其代谢物	Small Peptide	小肽	311.1	310.116	[M+H]+	C14H18N2O6	2	31782	48877.8	18110.1	43894	22183.3	24310.2	46169	39545.2	18232	28331	38691.5	27630.9	D81946	-	7009628	2545-89-3	-	-
MEDP2566	Tyr-Gly	L-酪氨酸-L-甘氨酸	Amino acid and Its metabolites	氨基酸及其代谢物	Small Peptide	小肽	239.1	238.095	[M+H]+	C11H14N2O4	2	279938	188673	360620	166770	224528	322227	392723	360817	241688	268312	243827	251403	-	HMDB0029105	7021854	673-08-5	-	-
MEDP1894	Tyr-Leu	酪氨酸-亮氨酸	Amino acid and Its metabolites	氨基酸及其代谢物	Small Peptide	小肽	295.2	294.158	[M+H]+	C15H22N2O4	2	206823	170882	395504	289825	137265	220552	420665	367982	199753	221902	215960	210127	C73328	HMDB0029109	87071	17355-10-1	-	-
MEDP1895	Tyr-Phe	酪氨酸-苯丙氨酸	Amino acid and Its metabolites	氨基酸及其代谢物	Small Peptide	小肽	311.1	328.142	[M-H2O+H]+	C18H20N2O4	2	18517.2	22476.4	17034.1	13485.7	11737.7	18240.2	11408.8	20396.9	24316.4	16782.5	20943.5	13825.4	-	HMDB0029112	3421919	17355-11-2	-	-
MEDP2430	Tyr-Pro	L-酪氨酸-L-脯氨酸	Amino acid and Its metabolites	氨基酸及其代谢物	Small Peptide	小肽	279.1	278.127	[M+H]+	C14H18N2O4	2	27310.2	21583.8	56916.7	51213.2	31945.9	44281	48672.3	52070.9	38313.5	27155.7	36667.1	51936.8	-	-	9795637	51871-47-7	-	-
MEDP2383	Tyr-Ser	L-酪氨酸-L-丝氨酸	Amino acid and Its metabolites	氨基酸及其代谢物	Small Peptide	小肽	269.1	268.106	[M+H]+	C12H16N2O5	2	32578.1	25958.3	105053	120694	45864.9	56130.8	116046	161878	52672.2	71053	59360.4	54535	-	-	54564570	13588-99-3	-	-
MEDP2503	Tyr-Thr	L-酪氨酸-L-苏氨酸	Amino acid and Its metabolites	氨基酸及其代谢物	Small Peptide	小肽	283.1	282.122	[M+H]+	C13H18N2O5	2	27942.2	43757.8	69551.1	77993.8	24562.1	63180.1	84204.5	80496.1	28746.4	66801.7	54970.8	50205.6	-	-	14522584	-	-	-
MEDP2432	Tyr-Tyr	L-酪氨酸-L-酪氨酸	Amino acid and Its metabolites	氨基酸及其代谢物	Small Peptide	小肽	345.1	344.137	[M+H]+	C18H20N2O5	2	64520.4	66339	140291	105288	57609.8	86821.8	130108	154165	90866.6	91446.9	65271.7	89225.9	-	-	70590	1050-28-8	-	-
MEDN1987	Tyr-Val	酪氨酸-缬氨酸	Amino acid and Its metabolites	氨基酸及其代谢物	Small Peptide	小肽	279.1	280.143	[M-H]-	C14H20N2O4	2	6430.49	7889.43	9737.51	6751.31	4283.11	9455.81	11651.8	12035.5	11189.7	10046.7	11062.1	8623.51	-	-	7009560	17355-09-8	-	-
MEDP0178	Uracil	尿嘧啶	Nucleotide And Its metabolites	核苷酸及其代谢物	Nucleotide And Its metabolites	核苷酸及其代谢物	113	112.027	[M+H]+	C4H4N2O2	1	16279.6	39689.8	57667.6	101640	56299.6	93977.1	86829.1	101739	39804.7	63245.1	78045.7	75640.6	C00106	HMDB0000300	1174	66-22-8	17568	258
MEDP0086	Urea	尿素	Alcohol and amines	醇、胺类	Amines	胺类	61	60.032	[M+H]+	CH4N2O	1	561821	519446	479374	447298	544078	490525	485779	547630	538338	513060	508022	504367	C00086	HMDB0000294	1176	57-13-6	16199	6
MEDP0333	Uric acid	尿酸	Organic acid And Its derivatives	有机酸及其衍生物	Organic acid And Its derivatives	有机酸及其衍生物	169	168.028	[M+H]+	C5H4N4O3	1	247060	176398	257852	206046	161658	299894	239644	183725	309375	178039	115770	286145	C00366	HMDB0000289	1175	69-93-2	17775	88
MEDN0171	Uridine	尿嘧啶核苷	Nucleotide And Its metabolites	核苷酸及其代谢物	Nucleotide And Its metabolites	核苷酸及其代谢物	243.1	244.07	[M-H]-	C9H12N2O6	1	5441.51	5826.06	25228.5	44879.3	13953.8	27285.1	33264.6	34678.2	13712.7	21914	22294.5	24532.8	C00299	HMDB0000296	6029	58-96-8	16704	90
MEDN0419	Uridine 5-Monophosphate	5-尿嘧啶核苷酸	Nucleotide And Its metabolites	核苷酸及其代谢物	Nucleotide And Its metabolites	核苷酸及其代谢物	323	324.036	[M-H]-	C9H13N2O9P	2	372567	498975	1.93997e+06	1.55508e+06	882087	2.05786e+06	2.11316e+06	2.42748e+06	720919	1.45215e+06	1.09239e+06	1.37706e+06	C00105	HMDB0000288	6030	58-97-9	16695	-
MEDP0357	Urocanic Acid	尿刊酸	Organic acid And Its derivatives	有机酸及其衍生物	Organic acid And Its derivatives	有机酸及其衍生物	139	138.043	[M+H]+	C6H6N2O2	1	123940	124792	98913.2	212696	155832	118195	156625	134874	252976	359044	359990	433584	C00785	HMDB0000301	736715	104-98-3	30817	298
MEDN1548	Val-Ala	L-缬氨酸-L-丙氨酸	Amino acid and Its metabolites	氨基酸及其代谢物	Small Peptide	小肽	187.1	188.116	[M-H]-	C8H16N2O3	2	1.95506e+06	2.236e+06	1.96005e+06	2.07231e+06	2.22582e+06	2.24955e+06	2.26193e+06	2.17551e+06	2.20774e+06	2.2888e+06	2.52929e+06	2.34932e+06	-	-	6992638	27493-61-4	-	-
MEDP2327	Val-Arg	缬氨酸-精氨酸	Amino acid and Its metabolites	氨基酸及其代谢物	Small Peptide	小肽	274.2	273.18	[M+H]+	C11H23N5O3	2	14140.3	10879.6	2134.73	20497	10261.1	9968.77	19218.3	14042.7	8926.64	11665.2	21660.4	13799.4	-	HMDB0029121	444523	37682-75-0	-	-
MEDN1934	Val-Gln	L-缬氨酸-L-谷氨酰胺	Amino acid and Its metabolites	氨基酸及其代谢物	Small Peptide	小肽	244.1	245.138	[M-H]-	C10H19N3O4	2	25952.6	20790	28835.4	27742.3	28113.2	28799	20057.9	16133.1	23416.8	26502.3	8736.59	20136.8	-	-	5253209	42854-54-6	-	-
MEDP2399	Val-Glu	缬氨酸-谷氨酰胺	Amino acid and Its metabolites	氨基酸及其代谢物	Small Peptide	小肽	247.1	246.122	[M+H]+	C10H18N2O5	2	14504.6	12137.6	18692.1	36096.7	10206.5	12326.5	25459.5	22486.7	30016.2	21013.5	17318.9	41358.9	D81741	HMDB0029126	7009623	3062/7/5	-	-
MEDP2576	Val-His	L-缬氨酸-L-组氨酸	Amino acid and Its metabolites	氨基酸及其代谢物	Small Peptide	小肽	255.1	254.137	[M+H]+	C11H18N4O3	2	21621.1	12546.6	20903.3	27156.6	6243.92	32860.8	53358.9	29430.3	10324	10987.3	24765.1	28138.1	-	-	7408625	13589-07-6	-	-
MEDP2433*138	Val-Ile	缬氨酸-异亮氨酸	Amino acid and Its metabolites	氨基酸及其代谢物	Small Peptide	小肽	231.2	230.163	[M+H]+	C11H22N2O3	2	267879	203685	394591	262026	221275	247929	394797	472752	281232	289722	274383	238339	D97354	HMDB0029130	7010532	20556-14-3	-	-
MEDP2434*138	Val-Leu	缬氨酸-亮氨酸	Amino acid and Its metabolites	氨基酸及其代谢物	Small Peptide	小肽	231.2	230.163	[M+H]+	C11H22N2O3	2	267879	203685	394591	262026	221275	247929	394797	472752	281232	289722	274383	238339	-	HMDB0029131	6993118	3989-97-7	-	-
MEDN1942	Val-Thr	缬氨酸-苏氨酸	Amino acid and Its metabolites	氨基酸及其代谢物	Small Peptide	小肽	217.1	218.127	[M-H]-	C9H18N2O4	2	3.38046e+06	2.49289e+06	3.06035e+06	3.7118e+06	2.90757e+06	2.91246e+06	3.23473e+06	3.9773e+06	3.68013e+06	3.16081e+06	2.85696e+06	3.21912e+06	D82099	-	9815826	72636-02-3	-	-
MEDP1766	Val-Tyr	L-缬氨酰基-L-酪氨酸	Amino acid and Its metabolites	氨基酸及其代谢物	Small Peptide	小肽	281.2	280.142	[M+H]+	C14H20N2O4	2	146121	129973	247209	157492	109475	131502	265194	254837	153026	135830	169356	131452	-	-	7009555	3061-91-4	-	-
MEDN2297	Vanillic acid 4-O-sulfate	香草醛酸4-O-磺酸	Organic acid And Its derivatives	有机酸及其衍生物	Sulfonic acids	磺酸类化合物	247	247.999	[M-H]-	C8H8O7S	2	403053	412947	434825	383333	447083	366273	400496	452707	433230	338786	394237	407287	-	HMDB0041788	382946	71235-86-4	88847	-
MEDN0241	Vitamin D3	维生素D3	CoEnzyme and vitamins	辅酶和维生素	CoEnzyme and vitamins	辅酶和维生素	383.3	384.339	[M-H]-	C27H44O	2	47661.8	56217.3	87723.2	50383.9	95742.4	38317.7	36640.5	42745.3	43471	212466	211792	206151	C05443	HMDB0000876	10883523	67-97-0	28940	-
MEDN0140	Xanthine	黄嘌呤	Nucleotide And Its metabolites	核苷酸及其代谢物	Nucleotide And Its metabolites	核苷酸及其代谢物	151	152.033	[M-H]-	C5H4N4O2	1	446331	504478	376217	868579	1.07586e+06	885385	641733	695716	659959	444589	512137	693753	C00385	HMDB0000292	1188	69-89-6	17712	82
MEDN0533	Xanthosine	黄苷	Nucleotide And Its metabolites	核苷酸及其代谢物	Nucleotide And Its metabolites	核苷酸及其代谢物	283.1	284.076	[M-H]-	C10H12N4O6	1	19470.7	16961.4	25687.8	32877.9	29271.7	53843.1	27654.6	27389.9	25911.4	27744.5	17098.5	23388.5	C01762	HMDB0000299	64959	146-80-5	18107	3408
MEDN1802	Zereno	折仑诺	Benzene and substituted derivatives	苯及其衍生物	Benzene and substituted derivatives	苯及其衍生物	321.2	322.178	[M-H]-	C18H26O5	2	47710.3	45382.7	51308.1	50741.4	35199.5	52250.4	40996.3	37518.4	40478.3	51200.3	52723.4	47286.1	C14752	HMDB0032702	2999413	26538-44-3	-	-
MEDP1844*165	alpha-D-Glucopyranoside,-beta-D-fructofuranosyl	β-D-呋喃果糖基-α-D-吡喃葡萄糖苷	Carbohydrates and Its metabolites	碳水化合物及其代谢物	Sugars	糖类	343.1	342.116	[M+H]+	C12H22O11	2	85773.2	76866.1	100068	92984.9	156621	69517.4	149911	109415	86057.6	91608.3	128108	133728	-	-	1115	1192061-43-0	-	-
MEDN2287	alpha-Methoxy-1H-indole-3-propanoic acid	α-甲氧基-1H-吲哚-3-丙酸	Heterocyclic compounds	杂环化合物	Indole and Its derivatives	吲哚及其衍生物	218.1	219.09	[M-H]-	C12H13NO3	2	7.45107e+06	7.75691e+06	8.04361e+06	7.79731e+06	8.24535e+06	7.11143e+06	8.03312e+06	9.05989e+06	7.96117e+06	6.38024e+06	7.22462e+06	7.42173e+06	-	HMDB0038339	84128275	-	-	-
MEDP0716	cis-Citral	柠檬醛	Aldehyde,Ketones,Esters	醛、酮、酯类	Aldehydes	醛类	153.2	152.12	[M+H]+	C10H16O	2	261292	475942	357718	360037	293544	313578	335210	296234	349972	352105	329488	261088	C01499	HMDB0035092	638011	5392-40-5	29020	-
MEDN1970	cyclo(glu-glu)	环(谷氨酸-谷氨酸)	Amino acid and Its metabolites	氨基酸及其代谢物	Small Peptide	小肽	257.1	258.086	[M-H]-	C10H14N2O6	2	6142.51	8601.88	5312.95	8346.4	4281.27	4516.98	13139.5	5486.76	7117.05	5947.76	5153.31	7484.83	-	-	7408481	16691-00-2	-	-
MEDN0536	estrone 3-sulfate	雌酮3-硫酸盐	Hormones and hormone related compounds	激素及激素相关物质	Hormones and hormone related compounds	激素及激素相关物质	349.1	350.119	[M-H]-	C18H22O5S	2	17198.3	16214.9	19738.1	15811.8	18019.3	14586.6	16361.2	17573.4	16317.7	16706.8	15288.8	18320.5	C02538	HMDB0001425	3556	481-97-0	17474	3556
MEDP0668	m-Cresol	间甲酚	Benzene and substituted derivatives	苯及其衍生物	Phenolics	苯酚类	109.4	108.058	[M+H]+	C7H8O	2	374634	399218	380356	377174	390628	361024	395670	364859	422660	333972	355819	343713	C01467	HMDB0002048	342	108-39-4	17231	-
MEDP2688	methylcarbamyl PAF	甲基氨基甲酰PAF	FA	脂肪酰类	Others	其他	538.4	538.375	[M]+	C26H55N2O7P+	2	5.06709e+08	8.78102e+08	5.44945e+08	5.18351e+08	5.25943e+08	550652078	4.9611e+08	4.44811e+08	8.07905e+08	4.8623e+08	5.10717e+08	4.66516e+08	-	-	124663	91575-58-5	-	-
MEDP2810	n-Oleoylethanolamine	油酰乙醇酰胺	FA	脂肪酰类	Others	其他	326.3	325.298	[M+H]+	C20H39NO2	2	58895.1	50085.5	63970.5	110981	116688	127169	78037.6	82243.1	73037.8	60007.4	73528.9	82578.7	-	HMDB0002088	5283454	111-58-0	71466	-
MEDP0180	Β-Nicotinamide Mononucleotide	β-烟酰胺单核苷酸	Nucleotide And Its metabolites	核苷酸及其代谢物	Nucleotide And Its metabolites	核苷酸及其代谢物	335.1	334.057	[M+H]+	C11H15N2O8P	2	132761	107683	38575.5	32379	63797.8	14181.7	10106.1	18129.8	35228.7	51809.3	67215.8	61987.8	C00455	HMDB0000229	14180	1094-61-7	16171	5238
MEDP0383	Β-Pseudouridine	假尿苷	Nucleotide And Its metabolites	核苷酸及其代谢物	Nucleotide And Its metabolites	核苷酸及其代谢物	245	244.07	[M+H]+	C9H12N2O6	2	171427	103352	186184	193405	286489	166504	252166	207195	202427	220357	241329	194172	C02067	HMDB0000767	15047	1445-07-4	17802	5734
MEDN1836*060	Δ12-Prostaglandin J2	Δ12-前列腺素 J2	FA	脂肪酰类	Oxidized lipids	氧化脂质	333.2	334.215	[M-H]-	C20H30O4	2	8307.28	1471.04	28849	40574.9	8091.78	10813.7	19400.7	23685.6	12704.4	13446.7	16182.3	16639.4	C05958	HMDB0004238	5280885	87893-54-7	28130	7034
MEDP1005*102	β-Alanine	β-氨基丙酸	Amino acid and Its metabolites	氨基酸及其代谢物	Amino acids	氨基酸	90	89.048	[M+H]+	C3H7NO2	1	424748	787807	667495	533329	423517	521265	563545	445624	562050	447335	836194	999630	C00099	HMDB0000056	239	107-95-9	16958	5119
MEDN0074	γ-Glu-Cys	γ-L-谷氨酸-L-半胱氨酸	Amino acid and Its metabolites	氨基酸及其代谢物	Small Peptide	小肽	249.1	250.062	[M-H]-	C8H14N2O5S	2	206462	224072	214644	186227	200183	195271	196117	179066	197724	174721	199989	189653	C00669	HMDB0001049	123938	636-58-8	17515	5966
MEDP2333	γ-Glu-Lys	谷氨酰-赖氨酸	Amino acid and Its metabolites	氨基酸及其代谢物	Small Peptide	小肽	276.2	275.148	[M+H]+	C11H21N3O5	2	25339.4	41991.7	33731.1	33168.4	24213	16286.8	15104.9	24691.4	38414.7	34764.7	17118.8	18167.8	-	-	5288444	-	-	-
MEDP0541	δ-Valerolactam	δ-戊内胺	Alcohol and amines	醇、胺类	Amines	胺类	100.1	99.0684	[M+H]+	C5H9NO	1	1.11321e+06	1.05006e+06	1.14285e+06	1.11721e+06	1.13363e+06	998786	1.13992e+06	1.15145e+06	1.11997e+06	1.02302e+06	1.03989e+06	1.00565e+06	-	HMDB0011749	12665	675-20-7	77761	-

[truncated: 5 more sheets: qPCR, LGG-1, mt-Keima, WB, DAF-16]
