# Supplementary figures and images for: Asperuloside, the bioactive compound in the edible Eucommia ulmoides male flower, delays muscle aging by daf-16 mediated improvement in mitochondrial dysfunction
Source: Royal Society of Chemistry journal article supplement (doi:10.1039/d3fo01024d), 2023-01-01

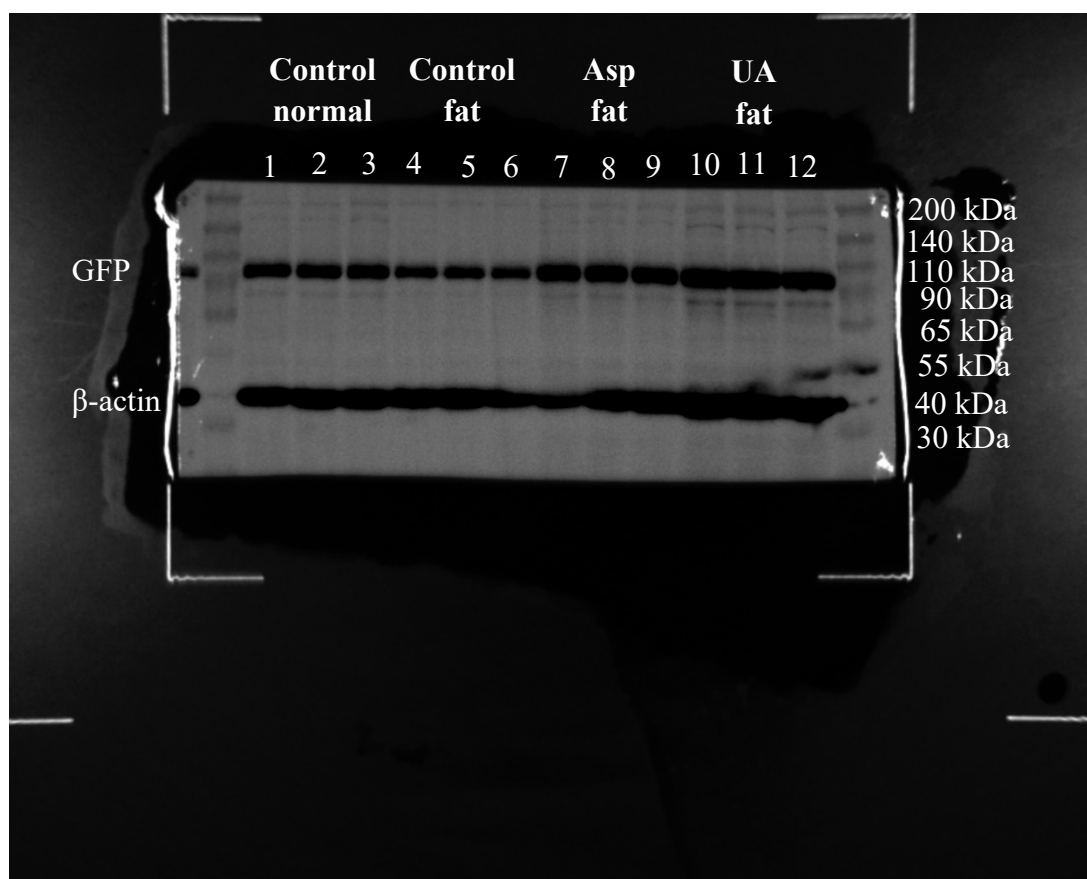

Supplement: d3fo01024d3.pdf [file d3fo01024d3.pdf]
